# Supplementary material for: ASCL2 Maintains Stemness Phenotype through ATG9B and Sensitizes Gliomas to Autophagy Inhibitor
Source: PubMed Central journal article supplement (PMC9507388; doi:10.1002/advs.202105938), 2022-07-26
Supplement: ADVS-9-2105938-s001.pdf [file ADVS-9-2105938-s001.pdf]

# ADVANCED SCIENCE

Open Access

## Supporting Information

for *Adv. Sci.*, DOI 10.1002/adv.202105938

ASCL2 Maintains Stemness Phenotype through ATG9B and Sensitizes Gliomas to Autophagy Inhibitor

*Li-Hong Wang, Ye Yuan, Jiao Wang, Ying Luo, Yang Lan, Jia Ge, Lei Li, Feng Liu, Qing Deng, Ze-Xuan Yan, Mei Liang, Sen Wei, Xin-Dong Liu, Yan Wang, Yi-Fang Ping, Yu Shi, Shi-Cang Yu, Xia Zhang, You-Hong Cui, Xiao-Hong Yao, Hua Feng, Tao Luo\* and Xiu-Wu Bian\**

## Supporting information

### **ASCL2 maintains stemness phenotype through ATG9B and sensitizes gliomas to autophagy inhibitor**

*Li-Hong Wang, Ye Yuan, Jiao Wang, Ying Luo, Yang Lan, Jia Ge, Lei Li, Feng Liu, Qing Deng, Ze-Xuan Yan, Mei Liang, Sen Wei, Xin-Dong Liu, Yan Wang, Yi-Fang Ping, Yu Shi, Shi-Cang Yu, Xia Zhang, You-Hong Cui, Xiao-Hong Yao, Hua Feng, Tao Luo\* and Xiu-Wu Bian\*.*

#### **The file includes:**

Figure S1. ATG9B is correlated with poor prognosis in gliomas.

Figure S2. Knock-down of ATG9B inhibits autophagy flux in gliomas.

Figure S3. The mRNA expression of genomic neighborhood of *ATG9B* was not consistent and ASCL2 overexpression activates autophagy.

Figure S4. Enforced expression of ASCL2 improves stemness phenotype.

Figure S5. ATG9B is indispensable for ASCL2-mediated in glioma stem cell and ASCL2 is regulated by CTNNB1 in gliomas.

Figure S6. ASCL2 is correlated with poor prognosis in gliomas.

Figure S7. ROC-325 inhibits proliferation of intracranial xenografts and has no severe systemic side effects.

Figure S8. ROC-325 sensitizes glioma cells to TMZ.

Table S1. The clinicopathologic mutational and survival information of patients with glioma in southwest (SW) hospital.

Table S2. The clinicopathologic mutational and survival information of patients with glioma in TCGA dataset.

Table S3. Univariate and multivariable Cox regression analyses of factors associated with overall survival in glioma patients(n=610).

Table S4. The clinicopathologic information of patients whose samples were used in figure S6.

Table S5. The primers of indicated genes.

Table S6. Primary antibodies information list.

Table S7. Second antibodies information list.

Table S8: The clinicopathologic information of primary glioma cells.

Table S9. The primer of 3 predicted binding region of ATG9B.

**Figure S1**

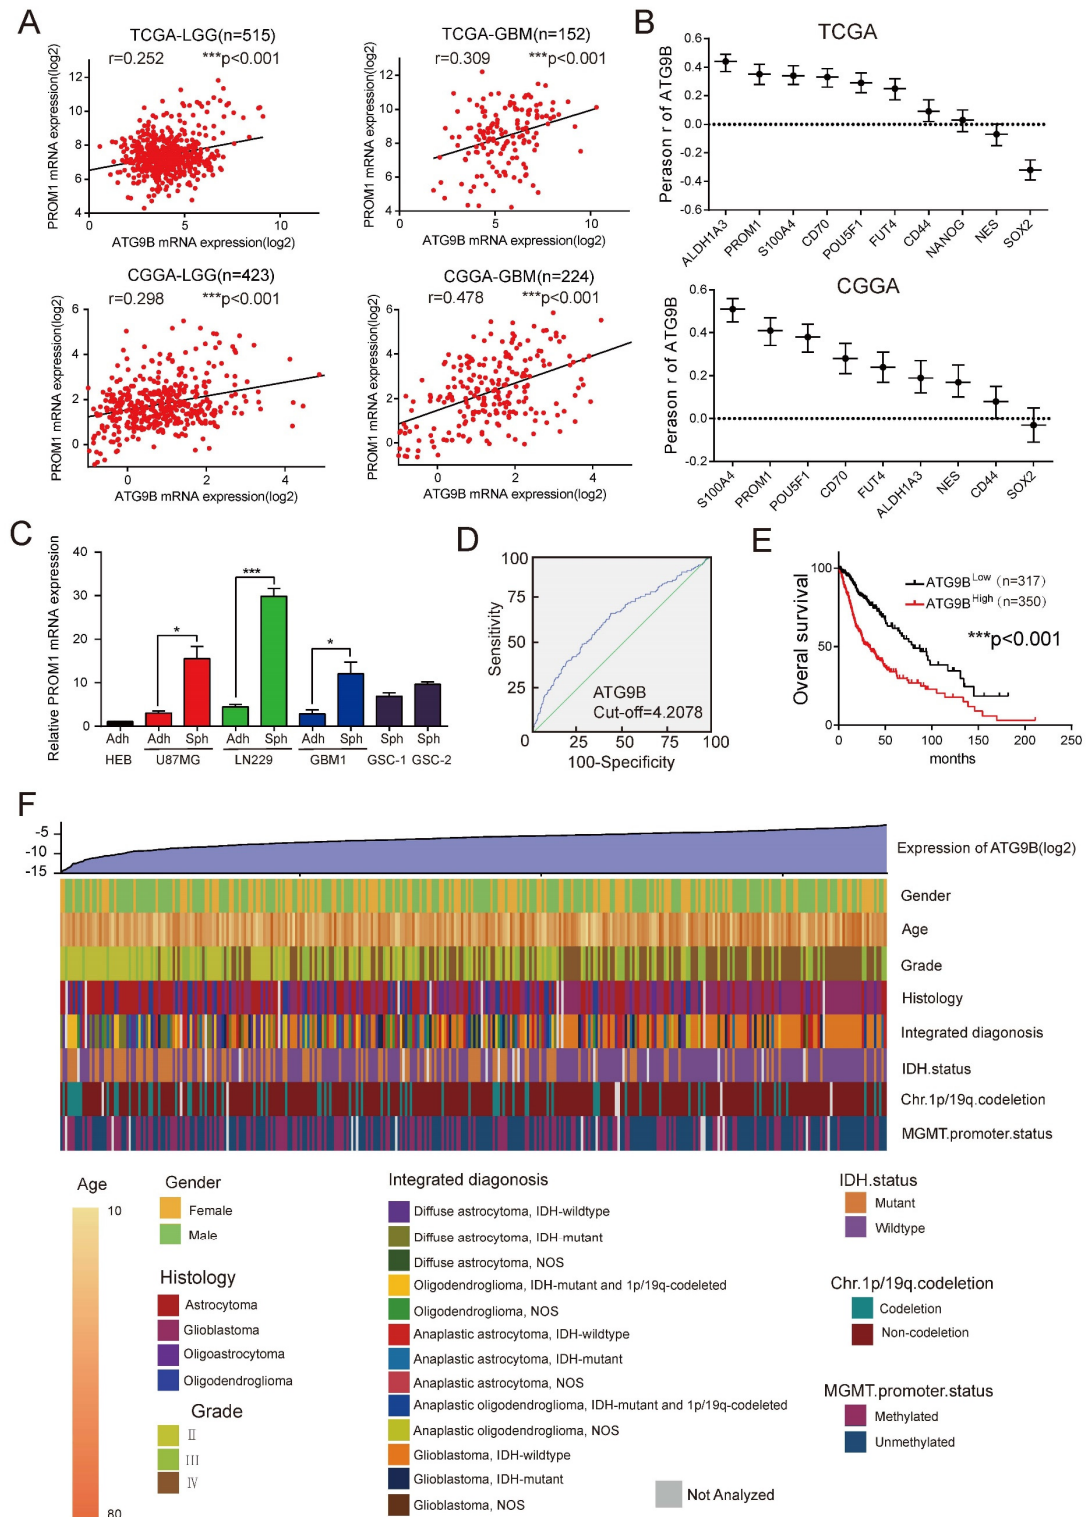

**Figure S1. ATG9B is correlated with poor prognosis in gliomas. (A)** Correlation analysis of the expression of ATG9B and stemness-related genes in the TCGA

(n=669) and CGGA(n=649) LGGGBM dataset, Pearson's r test. (B) Correlation analysis of the expression of ATG9B and PROM1 in the TCGA LGG(n=515)/GBM(n=152) and CGGA LGG(n=423)/GBM(n=224) datasets. Pearson's r test. (C) The mRNA expression of PROM1 in adherent cells/tumorspheres of 2 glioma cell lines (U87MG, LN229) and 1 primary glioma cell line (GBM1). HEB cell line as negative control and primary glioma stem cells as positive control (GSC-1 and GSC-2). (D, E) ROC analysis (D) and Kaplan–Meier survival analysis (E) were performed in patients with glioma in the TCGA database according to ATG9B mRNA expression. n=667, log-rank test. (F) Heatmap showing the distribution of clinical features and genetic characteristics in glioma specimens from Southwest Hospital. n=338.

**Figure S2**

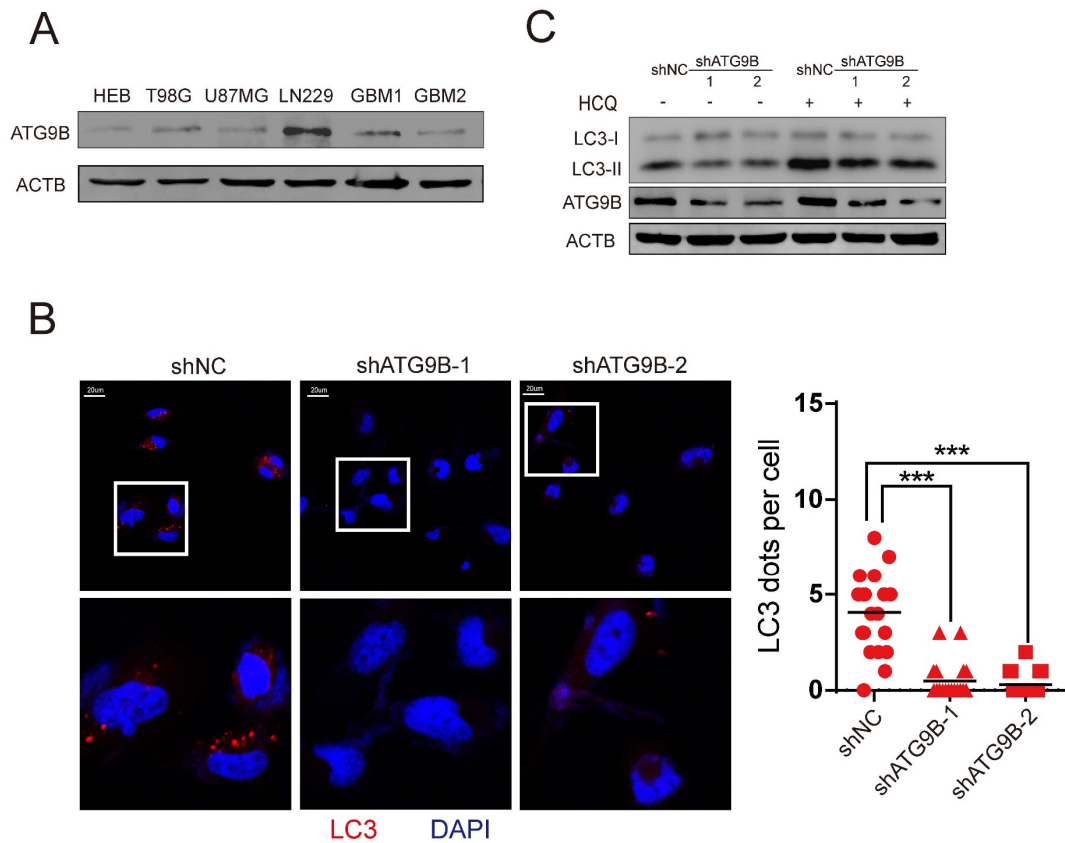

**Figure S2. Knock-down of ATG9B inhibits autophagy flux in gliomas.** (A) The expression of ATG9B was detected in glial cells, glioma cell lines and primary glioma cells. (B) Representative images of LC3 staining in LN229 cells expressing shNC/shATG9-1/shATG9B-2, with a magnified image (left panel). LC3 dots per cell were quantified (right panel). The scale bar represents 20  $\mu$ m. Data are shown as scatter plots and means.  $n=20$ . (C) With or without hydroxychloroquine (HCQ, 10  $\mu$ M) treatment, LC3-II accumulation was measured in LN229 cells expressing shNC/shATG9-1/shATG9B-2. \*\*\* $P<0.001$ .

**Figure S3**

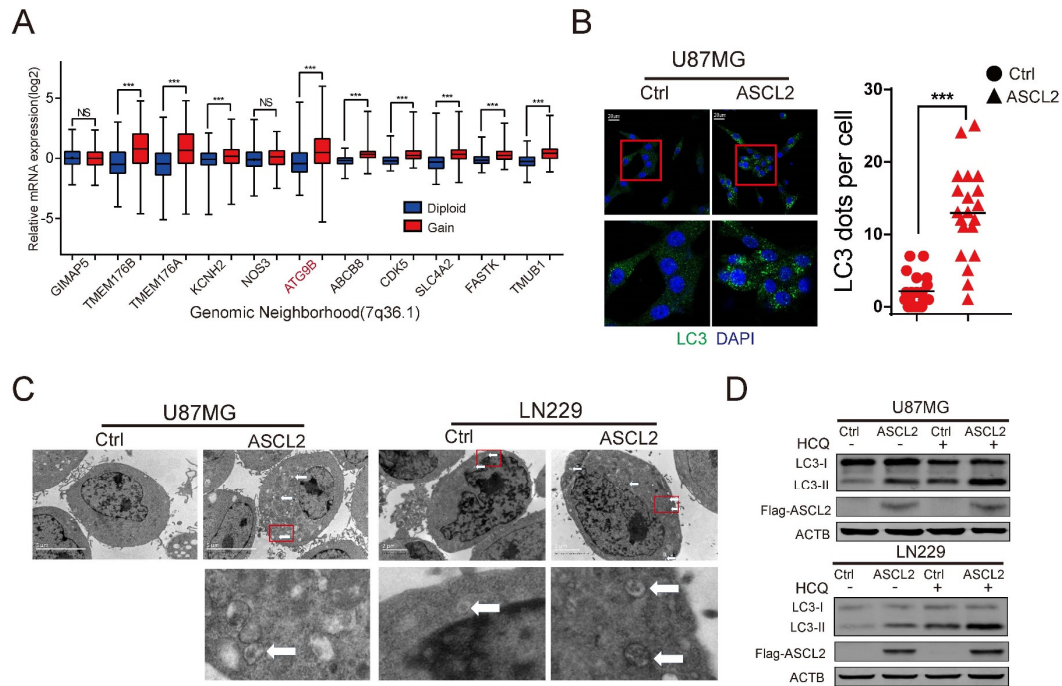

**Figure S3. The mRNA expression of genomic neighborhood of *ATG9B* was not consistent and ASCL2 overexpression activates autophagy.** (A) mRNA expression of the indicated genes in the indicated gene gain/diploid groups. The patients were from TCGA LGGGBM dataset. The genes were in the Genomic Neighborhood of *ATG9B*, which was located on 7q36.1. (B) Representative images of LC3 staining in U87MG cells overexpressing Ctrl/ASCL2, with magnified images (left panel). The number of LC3 dots per cell was quantified (right panel). Data are shown as scatter plots and means. n=20. (C) Representative electron micrographs of autophagic vesicles or autophagosomes of U87MG/LN229 cells overexpressing Ctrl/ASCL2. Arrows denote autophagosomes. Magnified images are shown. (D) With or without

hydroxychloroquine (HCQ, 10  $\mu$ M), LC3-II accumulation was measured in U87MG/LN229 cells overexpressing Ctrl/ASCL2. \*\*P<0.01, \*\*\*P<0.001.



**Figure S4**

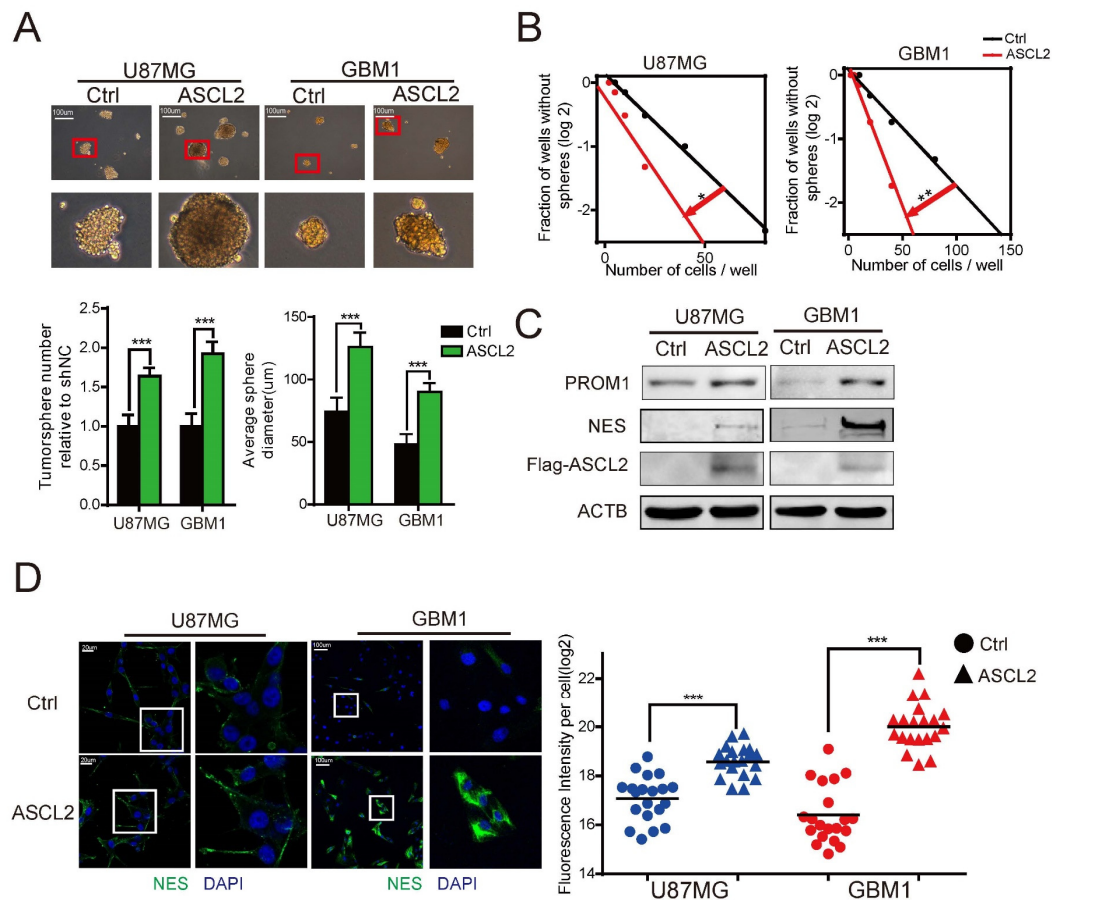

**Figure S4. Enforced expression of ASCL2 improves stemness phenotype.** (A) Representative images of tumorspheres in U87MG/GBM1 cells overexpressing Ctrl/ASCL2, with a magnified image (upper panel). The numbers and diameters of tumorspheres were quantified (lower panel). The data were collected on the 7th day after cell placement. (B) In vitro limiting dilution assay of U87MG/GBM1 cells overexpressing Ctrl/ASCL2. The data were collected on the 7th day after cell placement. (C) Protein level of PROM1/NES in U87MG/LN229 cells overexpressing Ctrl/ASCL2. (D) Representative images of NES staining and magnified images of the indicated cells overexpressing Ctrl/ASCL2 are shown (left panel). Fluorescence intensity per cell was

quantified (right panel). The scale bar is as shown. Data are shown as scatter plots and means. n=20. \*P<0.05, \*\*P<0.01, \*\*\*P<0.001.

**Figure S5**

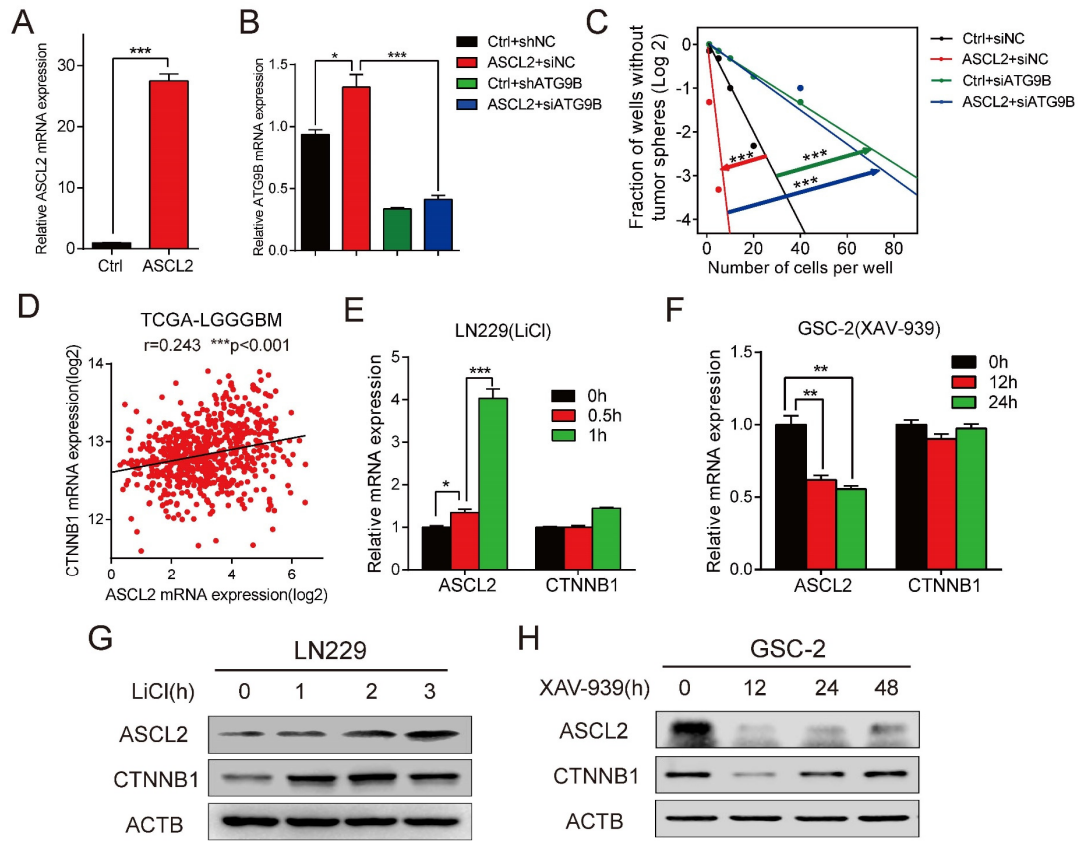

**Figure S5. ATG9B is indispensable for ASCL2-mediated in glioma stem cell and ASCL2 is regulated by CTNNB1 in gliomas.** (A) mRNA expression of ASCL2 in GSC-1 cells overexpressing Ctrl/ASCL2. (B) mRNA expression of ATG9B in GSC-1 cells expressing Ctrl/ASCL2 and siNC/siATG9B. (C) Limiting dilution assay was performed in GSC-1 cells expressing Ctrl/ASCL2 and siNC/siATG9B. (D) Correlation analysis of the expression of ASCL2 and CTNNB1 in the TCGA LGGGBM dataset (n=669). Pearson's r test. (E, F) mRNA expression of ASCL2 in LN229 cells treated with LiCl (activator of canonical wnt/ $\beta$ -catenin signaling, 20 mM) and GSC-1 cells treated with XAV-939 (inhibitor of canonical wnt/ $\beta$ -catenin signaling, 1  $\mu$ M) for indicated times. (G, H) ASCL2 expression were detected by immunoblotting in LN229

cells treated with LiCl (20 mM) and GSC-1 cells treated with XAV-939 (1  $\mu$ M) for indicated times.

**Figure S6**

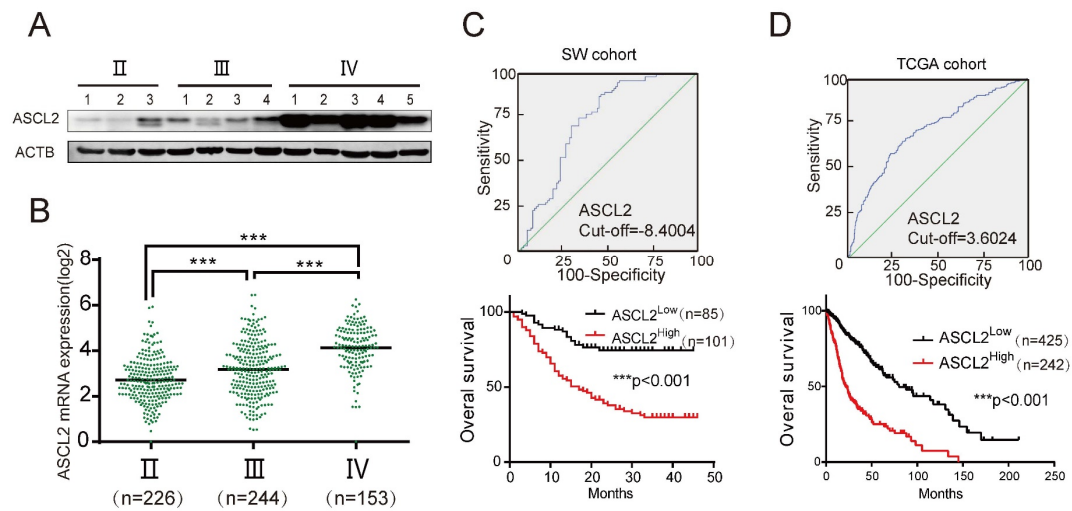

**Figure S6. ASCL2 is correlated with poor prognosis in gliomas. (A)** ASCL2 expression was measured by immunoblotting in glioma samples of different grades. **(B)** The ASCL2 mRNA expression of the TCGA cohort was summarized with different grades (n=623). **(C, D)** ROC analysis (upper panel) and Kaplan–Meier survival analysis (lower panel) were performed on data from glioma patients according to ATG9B protein expression in the SW cohort and ATG9B mRNA expression in the TCGA cohort.

**Figure S7**

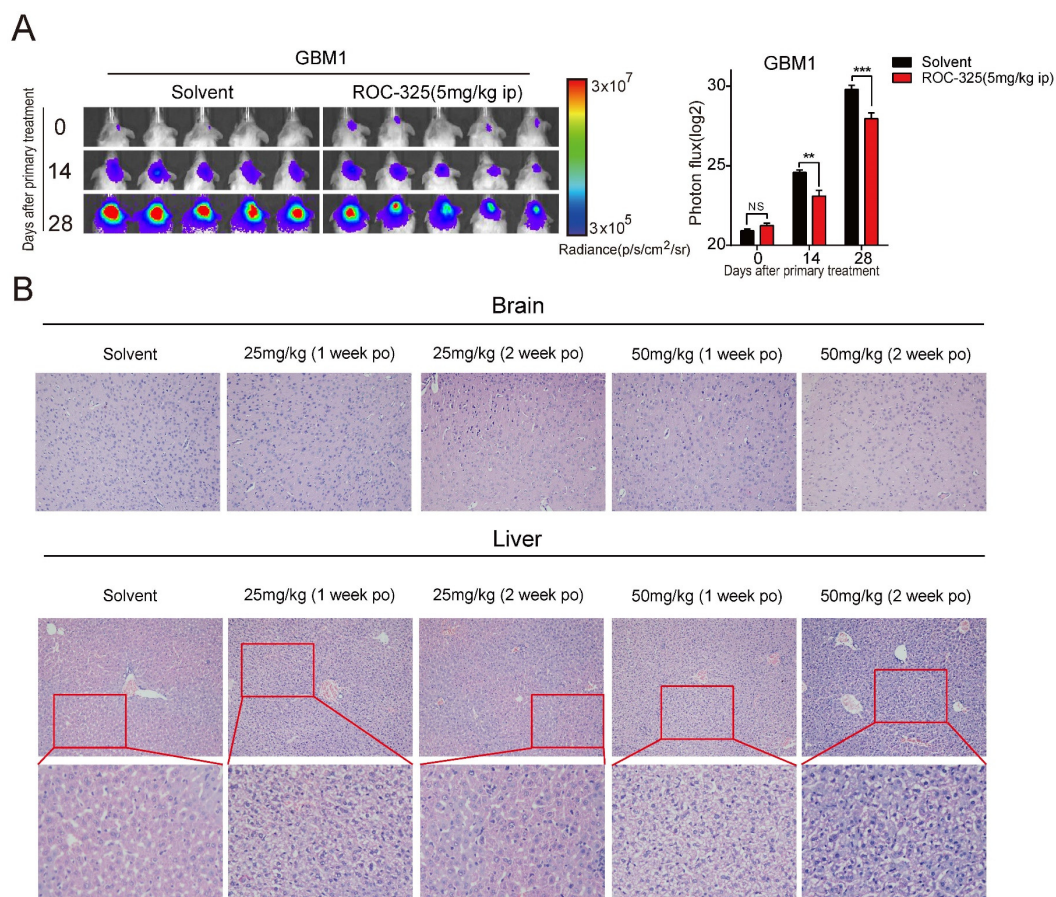

**Figure S7. ROC-325 inhibits proliferation of intracranial xenografts and has no severe systemic side effects. (A)** Representative bioluminescence images and quantification of intracranial xenografts derived from GBM1 cells treated with solvent/ROC-325 (5 mg/kg, 5 days a week, ip). n=10. **(B)** HE staining of brain and liver tissues from C57BL/6 mice treated with solvent/ROC-325 in Figure 6K.

**Figure S8**

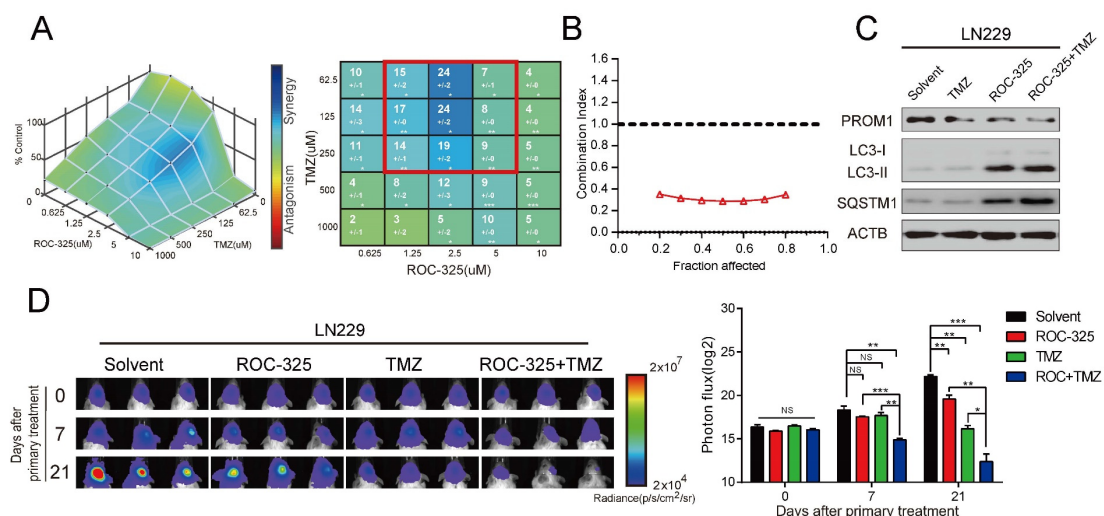

**Figure S8. ROC-325 sensitizes glioma cells to TMZ.** (A) Synergy surface plots in LN229 cells show increase in synergy between ROC-325 and TMZ (n=3). The data in red box was analyzed in panel B. (B) The interaction between ROC-325 and TMZ on cell killing was examined by the median-effect method of Chou–Talalay. Data are plotted as Fraction affected versus Combination Index (CI). CI < 1 represent synergistic interactions. (C) The expression of indicated molecules were detected with immunoblotting in LN229 cells treated with ROC-325(2.5 μM) and/or TMZ (250 μM) for 48 hr. (D) Bioluminescence images of intracranial xenografts derived from LN229 cells treated with ROC-325(5 mg/kg, 5 days a week, ip) and/or TMZ (5 mg/kg, 5 days a week, ip). n=3. Bioluminescence quantification of the intracranial xenografts in right panel.

**Supplementary Table 1: the clinicopathologic mutational and survival information of patients with glioma in southwest hospital**

| Case ID | Gender | Age | Position                                 | ASCL2 IOD(log2) | ATG9B IOD(log2) | Histology         | WHO grade | Integrated Diagnosis                  | IDH1 mutant | 1p/19q codeletion | MGMT Methylation |
|---------|--------|-----|------------------------------------------|-----------------|-----------------|-------------------|-----------|---------------------------------------|-------------|-------------------|------------------|
| 1       | Male   | 43  | ht frontotemporal lobe and basal gan     | -12.35362775    | -6.902785852    | Oligodendroglioma | II        | Oligodendroglioma, NOS                | -           | +                 | +                |
| 2       | Male   | 34  | Right parietal occipital lobe            | -4.957338236    | -4.796658369    | Glioblastoma      | IV        | Glioblastoma, IDH-wildtype            | -           | -                 | -                |
| 3       | Female | 48  | Right parietal occipital lobe            | -7.820569138    | -6.247068283    | Glioblastoma      | IV        | Glioblastoma, IDH-wildtype            | -           | -                 | +                |
| 4       | Male   | 35  | Left cerebellum                          | -9.768927093    | -8.56627174     | Astrocytoma       | II        | Diffuse astrocytoma, IDH-mutant       | +           | -                 | +                |
| 5       | Female | 67  | Left frontal lobe                        | -7.642458157    | -5.367938033    | Glioblastoma      | IV        | Glioblastoma, IDH-wildtype            | -           | -                 | +                |
| 6       | Male   | 27  | Left temporal lobe                       | -6.655160584    | -7.930201665    | Glioblastoma      | IV        | Glioblastoma, IDH-mutant              | +           | -                 | -                |
| 7       | Female | 63  | Right frontal lobe                       | -8.707785712    | -5.258620279    | Glioblastoma      | IV        | Glioblastoma, IDH-wildtype            | -           | -                 | +                |
| 8       | Male   | 62  | Left frontal lobe                        | -8.361343406    | -8.312301377    | Oligoastrocytoma  | III       | Anaplastic astrocytoma, IDH-wildtype  | -           | -                 | +                |
| 9       | Male   | 32  | Left frontal lobe                        | -9.945639774    | -7.611406698    | Glioblastoma      | IV        | Glioblastoma, IDH-wildtype            | -           | -                 | +                |
| 10      | Male   | 63  | Right frontal lobe                       | -7.05554787     | -4.651154066    | Glioblastoma      | IV        | Glioblastoma, IDH-wildtype            | -           | -                 | -                |
| 11      | Male   | 29  | Left frontal lobe                        | -11.24046345    | -10.98673321    | Astrocytoma       | II        | Diffuse astrocytoma, IDH-mutant       | +           | -                 | -                |
| 12      | Male   | 63  | Right temporal occipital lobe            | -8.015055899    | -5.955869129    | Astrocytoma       | IV        | Glioblastoma, IDH-wildtype            | -           | -                 | +                |
| 13      | Male   | 52  | frontotemporal lobe and corpus callo     | -6.501780954    | -6.660809728    | Glioblastoma      | IV        | Glioblastoma, IDH-wildtype            | -           | -                 | +                |
| 14      | Female | 48  | Right fronto parietal lobe               | -10.41700183    | -6.32908042     | Astrocytoma       | II        | Diffuse astrocytoma, IDH-mutant       | +           | -                 | -                |
| 15      | Female | 54  | Right temporal occipital lobe            | -3.900225745    | -2.906708827    | Glioblastoma      | IV        | Glioblastoma, IDH-wildtype            | -           | -                 | +                |
| 16      | Male   | 35  | Left frontal lobe                        | -8.630007798    | -8.32366402     | Astrocytoma       | II        | Diffuse astrocytoma, IDH-wildtype     | -           | -                 | -                |
| 17      | Male   | 44  | Right frontal lobe                       | -9.236180674    | -7.046914449    | Astrocytoma       | III       | Anaplastic astrocytoma, IDH-mutant    | +           | -                 | +                |
| 18      | Female | 20  | Left temporal occipital lobe             | -10.16684872    | -8.967804975    | Astrocytoma       | III       | Anaplastic astrocytoma, IDH-wildtype  | -           | -                 | -                |
| 19      | Female | 44  | Right fronto parietal lobe               | -7.700197215    | -5.498471421    | Oligodendroglioma | III       | ligodendroglioma, IDH-mutant and 1p/1 | +           | +                 | +                |
| 20      | Female | 74  | Right frontal lobe                       | -8.444382694    | -6.850382569    | Oligodendroglioma | III       | Anaplastic oligodendroglioma, NOS     | +           | -                 | +                |
| 21      | Male   | 32  | Left frontal lobe                        | -12.08103591    | -10.03476621    | Astrocytoma       | II        | Diffuse astrocytoma, IDH-mutant       | +           | -                 | +                |
| 22      | Male   | 27  | Left frontotemporal lobe                 | -10.48910032    | -9.273680983    | Oligoastrocytoma  | II        | ndroglioma, IDH-mutant and 1p/19q-cc  | +           | +                 | +                |
| 23      | Male   | 55  | Left temporal parietal occipital lobe    | -8.046433295    | -7.304065996    | NA                | II        | NA                                    | -           | -                 | +                |
| 24      | Male   | 50  | Left frontal lobe                        | -9.692027604    | -9.18165328     | Oligodendroglioma | II        | ndroglioma, IDH-mutant and 1p/19q-cc  | +           | +                 | +                |
| 25      | Male   | 62  | Right temporal parietal occipital lobe   | -5.366973082    | -4.689801636    | Glioblastoma      | IV        | Glioblastoma, IDH-wildtype            | -           | -                 | +                |
| 26      | Male   | 29  | Left frontal lobe                        | -10.29711597    | -7.509506074    | Oligoastrocytoma  | II        | ndroglioma, IDH-mutant and 1p/19q-cc  | +           | +                 | -                |
| 27      | Male   | 42  | Left parietal occipital lobe             | -6.744032456    | -8.372976158    | Oligodendroglioma | III       | ligodendroglioma, IDH-mutant and 1p/1 | +           | +                 | +                |
| 28      | Male   | 30  | Right temporal occipital lobe            | -6.930050677    | -6.75928257     | Astrocytoma       | III       | Anaplastic astrocytoma, IDH-mutant    | +           | -                 | +                |
| 29      | Female | 59  | Right parietal occipital lobe            | -8.772138545    | -8.545767977    | Glioblastoma      | IV        | Glioblastoma, IDH-wildtype            | -           | -                 | +                |
| 30      | Male   | 67  | Left parietal occipital lobe             | -8.620673577    | -5.354088054    | Glioblastoma      | IV        | Glioblastoma, IDH-wildtype            | -           | -                 | +                |
| 31      | Male   | 19  | Cerebellum                               | -8.977493348    | -10.35431519    | Astrocytoma       | II        | Diffuse astrocytoma, IDH-wildtype     | -           | -                 | NA               |
| 32      | Female | 67  | Right parietal lobe                      | -6.534340526    | -5.074152561    | Glioblastoma      | IV        | Glioblastoma, IDH-wildtype            | -           | -                 | +                |
| 33      | Male   | 55  | Left temporal occipital lobe             | -6.895053252    | -6.005751566    | Glioblastoma      | IV        | Glioblastoma, IDH-wildtype            | -           | -                 | -                |
| 34      | Female | 35  | Left frontal lobe                        | -7.727545613    | -5.610242432    | Glioblastoma      | IV        | Glioblastoma, IDH-mutant              | +           | +                 | +                |
| 35      | Male   | 40  | Right frontal lobe                       | -7.524556404    | -5.405603204    | Astrocytoma       | III       | Anaplastic astrocytoma, IDH-mutant    | +           | -                 | -                |
| 36      | Male   | 35  | Right parietal lobe                      | -7.248627939    | -4.913606734    | Glioblastoma      | IV        | Glioblastoma, IDH-mutant              | +           | +                 | +                |
| 37      | Male   | 52  | Right frontal lobe                       | -6.327205412    | -4.662110532    | Glioblastoma      | IV        | Glioblastoma, IDH-wildtype            | -           | -                 | +                |
| 38      | Female | 43  | Right frontal lobe                       | -9.777397144    | -7.331837064    | Astrocytoma       | III       | Anaplastic astrocytoma, IDH-wildtype  | -           | -                 | +                |
| 39      | Male   | 46  | Right temporal lobe                      | -7.710219342    | -5.279090332    | Glioblastoma      | IV        | Glioblastoma, IDH-wildtype            | -           | -                 | -                |
| 40      | Female | 42  | Left frontal lobe                        | -7.13947988     | -7.041843129    | Glioblastoma      | IV        | Glioblastoma, IDH-wildtype            | -           | -                 | -                |
| 41      | Male   | 42  | Right frontal lobe                       | -12.86845341    | -9.220383599    | Astrocytoma       | II        | Diffuse astrocytoma, IDH-mutant       | +           | -                 | -                |
| 42      | Female | 51  | Left fronto parietal lobe                | -7.766621227    | -6.517300276    | Glioblastoma      | IV        | Glioblastoma, IDH-mutant              | +           | +                 | +                |
| 43      | Male   | 39  | Right frontal lobe and corpus callosum   | -7.677691362    | -9.270896976    | Astrocytoma       | III       | Anaplastic astrocytoma, IDH-mutant    | +           | -                 | -                |
| 44      | Female | 28  | Left parietal lobe                       | -7.802288849    | -7.598783885    | Glioblastoma      | IV        | Glioblastoma, IDH-mutant              | +           | -                 | +                |
| 45      | Female | 30  | Midbrain                                 | -13.31660123    | -6.583270633    | Astrocytoma       | II        | Diffuse astrocytoma, IDH-wildtype     | -           | -                 | -                |
| 46      | Female | 51  | Cervical spinal cord                     | -6.852453484    | -6.021278483    | Oligoastrocytoma  | III       | Anaplastic astrocytoma, IDH-wildtype  | -           | -                 | -                |
| 47      | Female | 31  | Left temporal lobe                       | -9.358865469    | -5.077760543    | Astrocytoma       | II        | Diffuse astrocytoma, IDH-wildtype     | -           | -                 | -                |
| 48      | Female | 52  | Right parietal occipital lobe            | -6.64528337     | -5.699040935    | Glioblastoma      | IV        | Glioblastoma, IDH-wildtype            | -           | -                 | -                |
| 49      | Male   | 19  | Right temporal lobe                      | -7.964361888    | -9.06242179     | Astrocytoma       | II        | Diffuse astrocytoma, IDH-wildtype     | -           | -                 | -                |
| 50      | Male   | 54  | Right temporal lobe                      | -7.021865895    | -4.577312721    | Glioblastoma      | IV        | Glioblastoma, IDH-wildtype            | -           | -                 | +                |
| 51      | Male   | 54  | Right temporal occipital lobe            | -8.095607314    | -8.696705854    | Astrocytoma       | III       | Anaplastic astrocytoma, IDH-mutant    | +           | -                 | -                |
| 52      | Male   | 64  | Right parietal occipital lobe            | -7.341078299    | -6.891369458    | Glioblastoma      | IV        | Glioblastoma, IDH-wildtype            | -           | +                 | -                |
| 53      | Female | 29  | Left temporal lobe                       | -9.576433416    | -7.521299381    | Astrocytoma       | II        | Diffuse astrocytoma, IDH-wildtype     | -           | -                 | -                |
| 54      | Female | 36  | Right frontal lobe                       | -9.425335782    | -7.288239196    | Astrocytoma       | II        | Diffuse astrocytoma, IDH-wildtype     | -           | -                 | +                |
| 55      | Male   | 44  | Right temporal lobe                      | -9.990621369    | -8.157691176    | Astrocytoma       | II        | Diffuse astrocytoma, IDH-mutant       | +           | -                 | +                |
| 56      | Male   | 19  | Right cerebellum                         | -6.860548983    | -6.432392231    | Astrocytoma       | III       | Anaplastic astrocytoma, IDH-wildtype  | -           | -                 | NA               |
| 57      | Female | 42  | Left frontal lobe                        | -8.68762744     | -6.380733742    | Oligodendroglioma | II        | ndroglioma, IDH-mutant and 1p/19q-cc  | +           | +                 | +                |
| 58      | Male   | 45  | Left frontal lobe and corpus callosum    | -7.621641232    | -7.947342725    | Oligoastrocytoma  | III       | ligodendroglioma, IDH-mutant and 1p/1 | +           | +                 | +                |
| 59      | Male   | 45  | lateral frontal lobe and corpus callosum | -9.413952956    | -6.592307288    | Astrocytoma       | II        | Diffuse astrocytoma, IDH-mutant       | +           | -                 | +                |
| 60      | Female | 32  | Left temporal lobe                       | -6.746221913    | -4.689065893    | Astrocytoma       | III       | Anaplastic astrocytoma, IDH-mutant    | +           | -                 | +                |
| 61      | Female | 55  | Right parietal lobe                      | -7.436672626    | -3.882858866    | Glioblastoma      | IV        | Glioblastoma, IDH-wildtype            | -           | -                 | -                |
| 62      | Male   | 69  | Right frontal lobe                       | -8.19712877     | -5.479915283    | Astrocytoma       | III       | Anaplastic astrocytoma, IDH-wildtype  | -           | -                 | -                |
| 63      | Female | 52  | Right frontal lobe                       | -10.2692986     | -6.161564214    | NA                | IV        | Glioblastoma, IDH-mutant              | +           | -                 | +                |
| 64      | Male   | 26  | Left parietal lobe                       | -9.062441849    | -8.868611244    | Astrocytoma       | II        | Diffuse astrocytoma, IDH-mutant       | +           | -                 | -                |
| 65      | Female | 40  | Left frontotemporal parietal lobe        | -11.67631696    | -6.981441983    | Oligodendroglioma | III       | ligodendroglioma, IDH-mutant and 1p/1 | +           | +                 | +                |



|     |        |    |                                         |              |              |                   |     |                                       |    |   |    |
|-----|--------|----|-----------------------------------------|--------------|--------------|-------------------|-----|---------------------------------------|----|---|----|
| 66  | Male   | 37 | Left frontal lobe                       | -8.591174606 | -5.231567985 | Glioblastoma      | IV  | Glioblastoma, IDH-mutant              | +  | - | -  |
| 67  | Female | 24 | Right frontal lobe                      | -8.470814971 | -6.630602491 | Oligoastrocytoma  | II  | ndroglioma, IDH-mutant and 1p/19q-cc  | +  | + | NA |
| 68  | Male   | 47 | lateral frontal lobe and corpus callosu | -6.334959363 | -6.222553312 | Astrocytoma       | III | Anaplastic astrocytoma, IDH-mutant    | +  | - | +  |
| 69  | Male   | 52 | Left frontal lobe                       | -7.573550335 | -6.329436404 | Oligodendroglioma | II  | ligodendroglioma, IDH-mutant and 1p/1 | +  | + | +  |
| 70  | Male   | 49 | Left temporal lobe                      | -8.512846186 | -5.160093167 | Astrocytoma       | III | Anaplastic astrocytoma, IDH-mutant    | +  | - | +  |
| 71  | Male   | 67 | Right frontal lobe                      | -8.804115713 | -6.517369014 | Glioblastoma      | IV  | Glioblastoma, IDH-mutant              | +  | - | -  |
| 72  | Female | 46 | Left temporal occipital lobe            | -9.856856462 | -6.719318939 | Astrocytoma       | II  | Diffuse astrocytoma, IDH-wildtype     | -  | - | +  |
| 73  | Female | 49 | Right parietal lobe                     | -7.30100386  | -5.655987061 | Astrocytoma       | III | Anaplastic astrocytoma, IDH-mutant    | +  | - | +  |
| 74  | Male   | 48 | teral corpus callosum and lateral vent  | -8.497699893 | -4.352232391 | Astrocytoma       | III | Anaplastic astrocytoma, IDH-mutant    | +  | - | +  |
| 75  | Male   | 64 | Right frontotemporal lobe               | -7.5854128   | -5.835664514 | Oligodendroglioma | III | ligodendroglioma, IDH-mutant and 1p/1 | +  | + | +  |
| 76  | Female | 62 | Left frontal lobe                       | -9.711587116 | -6.573439563 | Glioblastoma      | IV  | Glioblastoma, IDH-wildtype            | -  | - | +  |
| 77  | Male   | 10 | Left frontal lobe                       | -7.315716324 | -7.178557349 | Glioblastoma      | IV  | Glioblastoma, IDH-wildtype            | -  | - | +  |
| 78  | Male   | 31 | Left parietal occipital lobe            | -7.537867683 | -5.865425115 | Astrocytoma       | III | Anaplastic astrocytoma, IDH-wildtype  | -  | - | -  |
| 79  | Male   | 27 | Right frontal lobe                      | -8.238377126 | -9.2622775   | Astrocytoma       | II  | Diffuse astrocytoma, IDH-wildtype     | -  | - | +  |
| 80  | Male   | 35 | Left frontotemporal lobe                | -9.125859341 | -10.36007309 | Astrocytoma       | II  | Diffuse astrocytoma, IDH-mutant       | +  | - | +  |
| 81  | Female | 49 | Left hippocampus and temporal lobe      | -7.896429281 | -7.46455892  | Astrocytoma       | II  | Diffuse astrocytoma, IDH-wildtype     | -  | - | -  |
| 82  | Male   | 44 | Left ventricle                          | -6.885395521 | -5.467273516 | Glioblastoma      | IV  | Glioblastoma, IDH-wildtype            | -  | - | +  |
| 83  | Male   | 54 | Superior cervical spinal cord           | -10.07795062 | -11.23150455 | Astrocytoma       | II  | Diffuse astrocytoma, IDH-wildtype     | -  | - | +  |
| 84  | Female | 30 | Right parietal lobe                     | -7.639604797 | -6.548476606 | Glioblastoma      | IV  | Glioblastoma, IDH-wildtype            | -  | - | -  |
| 85  | Female | 22 | Right middle cranial fossa              | -6.314419842 | -5.944414709 | Glioblastoma      | IV  | Glioblastoma, IDH-wildtype            | -  | - | -  |
| 86  | Male   | 48 | Left fronto parietal lobe               | -8.533175987 | -7.711941062 | Astrocytoma       | III | Anaplastic astrocytoma, IDH-wildtype  | -  | - | +  |
| 87  | Male   | 44 | Left frontotemporal lobe                | -8.085686432 | -6.226478275 | Glioblastoma      | IV  | Glioblastoma, IDH-wildtype            | -  | - | -  |
| 88  | Male   | 27 | Brainstem                               | -6.481255461 | -4.452373193 | Astrocytoma       | II  | Diffuse astrocytoma, NOS              | NA | - | NA |
| 89  | Male   | 51 | Left temporal occipital lobe            | -6.942235278 | -3.966073609 | Glioblastoma      | IV  | Glioblastoma, IDH-wildtype            | -  | + | -  |
| 90  | Male   | 45 | Left frontal lobe                       | -8.076937164 | -9.109809081 | Oligodendroglioma | III | ligodendroglioma, IDH-mutant and 1p/1 | +  | + | +  |
| 91  | Male   | 30 | Right fronto parietal lobe              | -9.972377168 | -6.25913314  | Astrocytoma       | III | Anaplastic astrocytoma, IDH-mutant    | +  | - | +  |
| 92  | Male   | 58 | Left temporal parietal occipital lobe   | -8.191896949 | -7.643170504 | Glioblastoma      | IV  | Glioblastoma, IDH-wildtype            | -  | - | -  |
| 93  | Male   | 38 | Right temporal parietal lobe            | -10.1174159  | -6.45254816  | Glioblastoma      | IV  | Glioblastoma, IDH-wildtype            | -  | - | -  |
| 94  | Female | 39 | Right frontal lobe                      | -11.13039401 | -10.15221588 | Oligodendroglioma | II  | ndroglioma, IDH-mutant and 1p/19q-cc  | -  | + | +  |
| 95  | Male   | 19 | Right frontal lobe                      | -12.33141402 | -8.866735941 | Astrocytoma       | II  | Diffuse astrocytoma, IDH-mutant       | +  | - | -  |
| 96  | Male   | 47 | Left temporal lobe                      | -11.0549391  | -9.788138048 | Astrocytoma       | II  | Diffuse astrocytoma, IDH-mutant       | +  | - | -  |
| 97  | Female | 37 | Right frontotemporal basal ganglia      | -14.2555197  | -8.094930117 | Oligodendroglioma | II  | ndroglioma, IDH-mutant and 1p/19q-cc  | +  | + | +  |
| 98  | Female | 43 | Right temporal lobe                     | -5.555422241 | -5.964947665 | Glioblastoma      | IV  | Glioblastoma, IDH-mutant              | +  | - | -  |
| 99  | Male   | 39 | Left frontal lobe                       | -7.05830551  | -4.879815122 | Glioblastoma      | IV  | Glioblastoma, IDH-mutant              | +  | - | -  |
| 100 | Female | 39 | Left fronto parietal lobe               | -6.836839193 | -6.608767822 | Oligoastrocytoma  | III | ligodendroglioma, IDH-mutant and 1p/1 | +  | + | -  |
| 101 | Female | 25 | Right temporal lobe                     | -8.439411726 | -6.638299825 | Astrocytoma       | III | Anaplastic astrocytoma, IDH-wildtype  | -  | - | -  |
| 102 | Male   | 22 | Left parietal occipital lobe            | -9.49028715  | -5.052233983 | Glioblastoma      | IV  | Glioblastoma, IDH-wildtype            | -  | - | -  |
| 103 | Male   | 30 | Right fronto parietal lobe              | -8.540449744 | -9.919461565 | Astrocytoma       | II  | Diffuse astrocytoma, IDH-mutant       | +  | - | -  |
| 104 | Female | 49 | Left frontotemporal lobe                | -8.47536129  | -5.003175504 | Astrocytoma       | III | Anaplastic astrocytoma, IDH-wildtype  | -  | - | -  |
| 105 | Female | 68 | Left temporal lobe                      | -4.977966235 | -5.574819468 | Glioblastoma      | IV  | Glioblastoma, IDH-wildtype            | -  | - | -  |
| 106 | Female | 21 | Right fronto parietal lobe              | -11.77332006 | -7.86033972  | Oligodendroglioma | II  | Diffuse astrocytoma, IDH-mutant       | +  | - | -  |
| 107 | Female | 27 | Left Island leaf                        | -7.994271272 | -8.361059645 | Oligodendroglioma | II  | ndroglioma, IDH-mutant and 1p/19q-cc  | +  | + | -  |
| 108 | Male   | 49 | Left frontotemporal lobe                | -9.150189312 | -9.591203545 | Astrocytoma       | II  | Diffuse astrocytoma, IDH-wildtype     | -  | - | +  |
| 109 | Female | 35 | Right parietal lobe                     | -11.80505519 | -6.547563805 | Astrocytoma       | II  | Diffuse astrocytoma, IDH-wildtype     | -  | - | -  |
| 110 | Male   | 41 | Right occipital lobe                    | -7.62314201  | -4.531798006 | Glioblastoma      | IV  | Glioblastoma, IDH-wildtype            | -  | - | -  |
| 111 | Male   | 48 | Right temporal lobe                     | -7.348036056 | -5.713208113 | Glioblastoma      | IV  | Glioblastoma, IDH-wildtype            | -  | - | -  |
| 112 | Female | 48 | Right cerebellum                        | -9.969854085 | -9.369969171 | Astrocytoma       | II  | Diffuse astrocytoma, IDH-wildtype     | -  | - | -  |
| 113 | Female | 31 | Left frontal lobe                       | -9.671566561 | -8.148357183 | Oligoastrocytoma  | II  | Diffuse astrocytoma, IDH-wildtype     | -  | - | -  |
| 114 | Male   | 56 | Right frontal lobe                      | -7.639627242 | -5.280212548 | Glioblastoma      | IV  | Glioblastoma, IDH-wildtype            | -  | - | -  |
| 115 | Male   | 47 | Right parietal occipital lobe           | -9.222645772 | -8.30932289  | Astrocytoma       | II  | Diffuse astrocytoma, IDH-mutant       | +  | - | -  |
| 116 | Male   | 29 | otemporal lobe, insular lobe and bas    | -8.123576413 | -5.608099707 | Oligoastrocytoma  | II  | Diffuse astrocytoma, IDH-mutant       | +  | - | +  |
| 117 | Female | 23 | Right frontal lobe                      | -9.310632667 | -7.0113531   | Oligoastrocytoma  | II  | Diffuse astrocytoma, IDH-mutant       | +  | - | +  |
| 118 | Female | 61 | Right frontal lobe and corpus callosun  | -10.27277559 | -7.235287199 | Oligodendroglioma | II  | ndroglioma, IDH-mutant and 1p/19q-cc  | +  | + | +  |
| 119 | Male   | 51 | Left frontal and temporal part          | -8.683348619 | -5.3857682   | Astrocytoma       | II  | Diffuse astrocytoma, IDH-mutant       | +  | - | +  |
| 120 | Male   | 74 | Left temporal lobe                      | -6.989224049 | -3.795009122 | Glioblastoma      | IV  | Glioblastoma, IDH-wildtype            | -  | - | -  |
| 121 | Female | 19 | Right temporal lobe                     | -7.597976807 | -7.229594418 | Oligoastrocytoma  | II  | Diffuse astrocytoma, IDH-wildtype     | -  | - | -  |
| 122 | Female | 53 | rontotemporal lobe and parietooccipit   | -8.34650259  | -3.44571192  | Glioblastoma      | IV  | Glioblastoma, IDH-wildtype            | -  | - | +  |
| 123 | Male   | 50 | Left temporal parietal lobe             | -5.126205237 | -3.562866956 | Glioblastoma      | IV  | Glioblastoma, IDH-mutant              | +  | - | +  |
| 124 | Female | 63 | Right fronto parietal lobe              | -7.420609873 | -4.207203302 | Astrocytoma       | III | Anaplastic astrocytoma, IDH-wildtype  | -  | - | -  |
| 125 | Male   | 23 | Left temporal lobe                      | -12.10893873 | -5.666366746 | Oligodendroglioma | II  | ndroglioma, IDH-mutant and 1p/19q-cc  | +  | + | -  |
| 126 | Male   | 55 | ontotemporal lobe and parietooccipit    | -7.443396272 | -4.073528313 | Glioblastoma      | IV  | Glioblastoma, IDH-wildtype            | -  | - | -  |
| 127 | Female | 47 | Left frontal lobe                       | -8.886824525 | -4.525171371 | Glioblastoma      | IV  | Glioblastoma, IDH-wildtype            | -  | - | -  |
| 128 | Male   | 53 | Left parietal occipital lobe            | -6.546490249 | -4.225431462 | Glioblastoma      | IV  | Glioblastoma, IDH-wildtype            | -  | - | -  |
| 129 | Male   | 18 | Left temporal lobe                      | -10.27523773 | -7.970719721 | Astrocytoma       | II  | Diffuse astrocytoma, IDH-wildtype     | -  | - | +  |
| 130 | Male   | 43 | Right frontal lobe                      | -11.3800836  | -7.343684289 | Astrocytoma       | II  | Diffuse astrocytoma, IDH-mutant       | +  | - | -  |
| 131 | Male   | 52 | Left frontal lobe and corpus callosum   | -9.494448748 | -6.483002912 | Astrocytoma       | II  | Diffuse astrocytoma, IDH-mutant       | +  | - | +  |
| 132 | Male   | 38 | Right temporal occipital lobe           | -8.75103509  | -3.993161948 | Astrocytoma       | III | Anaplastic astrocytoma, IDH-mutant    | +  | - | -  |

|     |        |    |                                        |              |              |                   |     |                                       |    |   |   |
|-----|--------|----|----------------------------------------|--------------|--------------|-------------------|-----|---------------------------------------|----|---|---|
| 133 | Male   | 52 | Right basal ganglia and temporal lobe  | -7.316858432 | -5.745140856 | Glioblastoma      | IV  | Glioblastoma, IDH-mutant              | +  | - | - |
| 134 | Female | 31 | Right frontal lobe                     | -9.024921368 | -4.684797286 | Astrocytoma       | II  | Diffuse astrocytoma, IDH-mutant       | +  | - | - |
| 135 | Female | 48 | Left frontal lobe                      | -6.934633095 | -3.777468658 | Glioblastoma      | IV  | Glioblastoma, IDH-wildtype            | -  | - | + |
| 136 | Female | 43 | Right frontal lobe                     | -9.318516397 | -8.158741555 | Astrocytoma       | II  | Diffuse astrocytoma, IDH-mutant       | +  | - | - |
| 137 | Male   | 25 | Left parietal lobe                     | -9.26499874  | -6.088923672 | Astrocytoma       | II  | Diffuse astrocytoma, IDH-mutant       | +  | - | - |
| 138 | Male   | 30 | Bilateral frontal lobe                 | -8.784394443 | -7.5856362   | Astrocytoma       | II  | ndroglioma, IDH-mutant and 1p/19q-cc  | +  | + | + |
| 139 | Male   | 55 | Left frontal lobe                      | -8.236361698 | -3.933505042 | Glioblastoma      | IV  | Glioblastoma, IDH-wildtype            | -  | - | + |
| 140 | Female | 35 | Left frontal lobe                      | -8.296360882 | -5.787652985 | Astrocytoma       | II  | Diffuse astrocytoma, IDH-mutant       | +  | - | - |
| 141 | Female | 49 | Right cerebellum and brainstem         | -9.479506776 | -4.799257214 | Astrocytoma       | II  | Diffuse astrocytoma, NOS              | NA | - | - |
| 142 | Male   | 28 | Left frontotemporal lobe               | -9.000061232 | -5.514632347 | Oligoastrocytoma  | II  | ndroglioma, IDH-mutant and 1p/19q-cc  | +  | + | + |
| 143 | Male   | 45 | Right frontal lobe                     | -7.866263119 | -2.929694717 | Oligoastrocytoma  | III | ligodendroglioma, IDH-mutant and 1p/1 | +  | + | + |
| 144 | Male   | 47 | Right frontal lobe                     | -8.735791475 | -5.40754318  | Oligodendroglioma | III | ligodendroglioma, IDH-mutant and 1p/1 | +  | + | + |
| 145 | Male   | 46 | Right parietal lobe                    | -6.295149433 | -4.300070816 | Glioblastoma      | IV  | Glioblastoma, IDH-wildtype            | -  | - | - |
| 146 | Male   | 52 | Left frontotemporal lobe               | -7.017698252 | -4.179118639 | Glioblastoma      | IV  | Glioblastoma, IDH-mutant              | +  | + | + |
| 147 | Female | 51 | NA                                     | -7.639544944 | -4.570733634 | Glioblastoma      | IV  | Glioblastoma, IDH-wildtype            | -  | - | - |
| 148 | Male   | 51 | Right occipital lobe and temporal par  | -7.86188375  | -3.786489189 | Glioblastoma      | IV  | Glioblastoma, IDH-wildtype            | -  | - | - |
| 149 | Female | 53 | Left frontal lobe                      | -7.197734512 | -2.968163124 | Glioblastoma      | IV  | Glioblastoma, IDH-wildtype            | -  | - | - |
| 150 | Female | 22 | Right frontal lobe                     | -8.557919283 | -5.21221561  | Astrocytoma       | III | Anaplastic astrocytoma, IDH-wildtype  | -  | - | + |
| 151 | Female | 63 | Left frontal lobe                      | -5.088513833 | -4.67973619  | Glioblastoma      | IV  | Glioblastoma, IDH-wildtype            | -  | - | + |
| 152 | Female | 43 | Left parietal lobe                     | -7.277523607 | -8.194092882 | Oligodendroglioma | III | NA                                    | NA | + | + |
| 153 | Male   | 58 | Left frontal lobe                      | -8.349461013 | -8.527945433 | Oligodendroglioma | II  | ndroglioma, IDH-mutant and 1p/19q-cc  | +  | + | + |
| 154 | Female | 48 | Left temporal and insular lobes        | -9.389463995 | -11.12770508 | Astrocytoma       | II  | Diffuse astrocytoma, IDH-mutant       | +  | - | + |
| 155 | Male   | 45 | Left frontal lobe                      | -7.831731591 | -8.258710771 | Glioblastoma      | IV  | Glioblastoma, IDH-wildtype            | -  | - | - |
| 156 | Male   | 42 | Right frontal lobe                     | -12.6823464  | -8.763258985 | Astrocytoma       | II  | Diffuse astrocytoma, IDH-mutant       | +  | - | + |
| 157 | Female | 15 | Right temporal lobe                    | -7.003412565 | -7.085080098 | Oligodendroglioma | III | Anaplastic oligodendroglioma, NOS     | +  | - | - |
| 158 | Female | 52 | Bilateral frontal lobe                 | -8.105917288 | -6.502651625 | Astrocytoma       | III | Anaplastic astrocytoma, IDH-wildtype  | -  | - | - |
| 159 | Male   | 45 | Right frontal lobe                     | -5.229122908 | -7.279486652 | Oligodendroglioma | III | Anaplastic oligodendroglioma, NOS     | +  | - | + |
| 160 | Male   | 68 | Right frontal lobe and corpus callosum | -7.047083139 | -6.265639439 | Astrocytoma       | III | Anaplastic astrocytoma, IDH-wildtype  | -  | - | + |
| 161 | Male   | 50 | Left temporal lobe                     | -7.407345722 | -4.822291932 | Glioblastoma      | IV  | Glioblastoma, IDH-wildtype            | -  | + | - |
| 162 | Male   | 44 | Left temporal lobe                     | -6.750513863 | -9.280734602 | Astrocytoma       | III | Anaplastic astrocytoma, IDH-mutant    | +  | - | + |
| 163 | Female | 37 | Left temporal lobe                     | -5.378831021 | -5.890632492 | Glioblastoma      | IV  | Glioblastoma, IDH-wildtype            | -  | - | + |
| 164 | Male   | 41 | Left frontal lobe                      | -7.671459474 | -7.463167949 | Oligoastrocytoma  | II  | ndroglioma, IDH-mutant and 1p/19q-cc  | +  | + | + |
| 165 | Female | 36 | Left frontal lobe                      | -6.721831522 | -6.874907807 | Glioblastoma      | IV  | Glioblastoma, IDH-wildtype            | -  | - | - |
| 166 | Female | 31 | Left frontal lobe                      | -5.976767767 | -7.853989092 | Glioblastoma      | IV  | Glioblastoma, IDH-wildtype            | -  | - | - |
| 167 | Male   | 28 | Left frontal lobe                      | -13.68382685 | -9.383763274 | Astrocytoma       | II  | Diffuse astrocytoma, IDH-wildtype     | -  | - | - |
| 168 | Female | 38 | Right frontal lobe                     | -9.446724063 | -6.011677442 | Oligoastrocytoma  | II  | ndroglioma, IDH-mutant and 1p/19q-cc  | +  | + | + |
| 169 | Male   | 66 | Left temporal lobe                     | -8.808836034 | -4.140792379 | Glioblastoma      | IV  | Glioblastoma, IDH-wildtype            | -  | - | - |
| 170 | Male   | 42 | Left frontal lobe                      | -13.11175892 | -7.442064692 | Astrocytoma       | II  | Diffuse astrocytoma, IDH-mutant       | +  | - | - |
| 171 | Male   | 30 | Right temporal lobe                    | -7.301228709 | -5.753759445 | Glioblastoma      | IV  | Glioblastoma, IDH-mutant              | +  | - | + |
| 172 | Male   | 53 | Occipital lobe                         | -5.029043807 | -4.800037782 | Glioblastoma      | IV  | Glioblastoma, IDH-wildtype            | -  | - | - |
| 173 | Male   | 49 | Left occipital lobe                    | -6.75029977  | -5.233739067 | Glioblastoma      | IV  | Glioblastoma, IDH-wildtype            | -  | - | - |
| 174 | Female | 61 | Right frontotemporal parietal lobe     | -6.032600762 | -7.107944679 | Glioblastoma      | IV  | Glioblastoma, IDH-wildtype            | -  | - | + |
| 175 | Male   | 69 | Right frontal lobe                     | -6.114732831 | -3.542920547 | Glioblastoma      | IV  | Glioblastoma, IDH-wildtype            | -  | - | + |
| 176 | Female | 28 | Left fronto parietal lobe              | -6.666065716 | -2.980675024 | Glioblastoma      | IV  | Glioblastoma, IDH-wildtype            | -  | - | - |
| 177 | Male   | 40 | Right frontal lobe                     | -6.342898343 | -3.47118732  | Glioblastoma      | IV  | Glioblastoma, IDH-wildtype            | -  | - | - |
| 178 | Female | 61 | Right parietal lobe                    | -6.450617307 | -2.675680592 | Astrocytoma       | III | Anaplastic astrocytoma, IDH-wildtype  | -  | - | - |
| 179 | Male   | 45 | NA                                     | -7.429805493 | -4.199906258 | Oligoastrocytoma  | II  | Diffuse astrocytoma, IDH-wildtype     | -  | - | - |
| 180 | Male   | 28 | Right frontal lobe                     | -6.509895811 | -3.557626354 | NA                | III | NA                                    | -  | - | - |
| 181 | Female | 68 | Left temporal lobe                     | -6.527495409 | -3.192403776 | Glioblastoma      | IV  | Glioblastoma, IDH-wildtype            | -  | - | - |
| 182 | Male   | 46 | Left temporal lobe                     | -6.032190652 | -4.261391466 | Glioblastoma      | IV  | Glioblastoma, IDH-wildtype            | -  | - | - |
| 183 | Female | 36 | Right frontal lobe                     | -6.598620252 | -5.855815295 | Astrocytoma       | II  | Diffuse astrocytoma, IDH-wildtype     | -  | - | - |
| 184 | Male   | 61 | Right frontal lobe                     | -6.903522317 | -8.294710497 | Astrocytoma       | III | Anaplastic astrocytoma, IDH-mutant    | +  | + | - |
| 185 | Male   | 35 | Right temporal lobe                    | -5.828764394 | -4.312824736 | Glioblastoma      | IV  | Glioblastoma, IDH-wildtype            | -  | - | + |
| 186 | Female | 57 | Right temporal lobe                    | -5.287885904 | -3.370636504 | Glioblastoma      | IV  | Glioblastoma, IDH-wildtype            | -  | - | - |
| 187 | Male   | 47 | Left frontal lobe                      | -8.522071568 | -6.892104574 | Astrocytoma       | III | Anaplastic astrocytoma, IDH-wildtype  | -  | - | - |
| 188 | Female | 33 | Left frontal lobe                      | -6.403208491 | -5.558352379 | Astrocytoma       | III | Anaplastic astrocytoma, IDH-mutant    | +  | - | - |
| 189 | Female | 42 | Left frontal lobe                      | -6.536853569 | -4.890917437 | Oligoastrocytoma  | III | Anaplastic astrocytoma, IDH-mutant    | +  | - | - |
| 190 | Male   | 48 | Left temporal lobe                     | -7.247629793 | -3.615986235 | Glioblastoma      | IV  | Glioblastoma, IDH-wildtype            | -  | - | - |
| 191 | Male   | 71 | Right temporal occipital lobe          | -5.994393255 | -3.163941729 | Glioblastoma      | IV  | Glioblastoma, IDH-wildtype            | -  | - | - |
| 192 | Male   | 37 | Right parietal lobe                    | -9.423582685 | -3.91307704  | Oligoastrocytoma  | II  | ndroglioma, IDH-mutant and 1p/19q-cc  | +  | + | + |
| 193 | Female | 72 | Left temporal lobe                     | -6.568730663 | -2.986966102 | Glioblastoma      | IV  | Glioblastoma, IDH-wildtype            | -  | - | - |
| 194 | Male   | 20 | Right temporal lobe                    | -10.80781003 | -6.418458087 | NA                | II  | Diffuse astrocytoma, IDH-wildtype     | -  | - | - |
| 195 | Male   | 24 | Left temporal parietal lobe            | -6.961184098 | -5.154980341 | Glioblastoma      | IV  | Glioblastoma, IDH-wildtype            | -  | - | - |
| 196 | Male   | 48 | Left frontal and temporal lobes        | -7.587215403 | -3.675370422 | Astrocytoma       | III | Anaplastic astrocytoma, IDH-wildtype  | -  | - | - |
| 197 | Male   | 73 | Left frontal lobe                      | -6.481996444 | -4.548809395 | Glioblastoma      | IV  | Glioblastoma, IDH-wildtype            | -  | - | - |
| 198 | Female | 53 | Right frontal lobe                     | -9.808247251 | -10.50150218 | Astrocytoma       | III | Anaplastic astrocytoma, IDH-mutant    | +  | + | + |
| 199 | Male   | 30 | Left parietal lobe                     | -7.440988577 | -4.860013896 | Astrocytoma       | II  | Diffuse astrocytoma, IDH-mutant       | +  | - | - |

|     |        |    |                                  |              |              |                   |     |                                       |    |    |    |
|-----|--------|----|----------------------------------|--------------|--------------|-------------------|-----|---------------------------------------|----|----|----|
| 200 | Male   | 41 | Right frontal lobe               | -8.310501636 | -5.40141863  | Oligodendroglioma | II  | ndroglioma, IDH-mutant and 1p/19q-cc  | +  | +  | +  |
| 201 | Male   | 18 | Left occipital lobe              | -7.183588207 | -4.501161431 | Glioblastoma      | IV  | Glioblastoma, IDH-wildtype            | -  | -  | -  |
| 202 | Male   | 30 | Right frontal lobe               | -6.428641518 | -6.922803575 | Glioblastoma      | IV  | Glioblastoma, IDH-wildtype            | -  | -  | -  |
| 203 | Female | 22 | Left frontal lobe                | -8.869839398 | -4.74580711  | Oligoastrocytoma  | II  | Diffuse astrocytoma, IDH-wildtype     | -  | -  | -  |
| 204 | Male   | 62 | Right frontal lobe               | -7.824705603 | -4.194974941 | Glioblastoma      | IV  | Glioblastoma, IDH-wildtype            | -  | -  | -  |
| 205 | Female | 54 | Right temporal lobe              | -7.721934492 | -4.604151335 | Oligodendroglioma | III | Anaplastic oligodendroglioma, NOS     | -  | +  | -  |
| 206 | Male   | 20 | Right temporal occipital lobe    | -6.786517664 | -3.521141288 | Glioblastoma      | IV  | Glioblastoma, IDH-wildtype            | -  | NA | -  |
| 207 | Male   | 58 | Right temporal lobe              | -4.515624089 | -3.468329974 | Glioblastoma      | IV  | Glioblastoma, IDH-wildtype            | -  | -  | -  |
| 208 | Female | 36 | Left frontal lobe                | -8.454073653 | -3.81015536  | Glioblastoma      | IV  | Glioblastoma, IDH-wildtype            | -  | -  | -  |
| 209 | Female | 13 | Cervicaland thoracic spinal cord | -6.94937223  | -5.14779709  | Oligodendroglioma | II  | Oligodendroglioma, NOS                | NA | +  | -  |
| 210 | Female | 44 | Left temporal lobe               | -7.458897446 | -3.011278983 | Oligoastrocytoma  | III | ligodendroglioma, IDH-mutant and 1p/1 | +  | +  | +  |
| 211 | Female | 46 | Left temporal lobe               | -9.119897826 | -6.209572606 | Oligodendroglioma | II  | Oligodendroglioma, NOS                | NA | -  | -  |
| 212 | Male   | 42 | Right frontal lobe               | -9.730427103 | -8.928409133 | Glioblastoma      | IV  | Glioblastoma, IDH-mutant              | +  | +  | +  |
| 213 | Male   | 49 | Left frontal lobe                | -8.889508841 | -13.31048972 | Oligoastrocytoma  | II  | ndroglioma, IDH-mutant and 1p/19q-cc  | +  | +  | +  |
| 214 | Male   | 53 | Left frontotemporal lobe         | -9.530232334 | -3.572401928 | Astrocytoma       | III | Anaplastic astrocytoma, IDH-wildtype  | -  | -  | -  |
| 215 | Female | 42 | Left frontal lobe                | -7.726154688 | -10.84549005 | Astrocytoma       | II  | Diffuse astrocytoma, IDH-mutant       | +  | -  | -  |
| 216 | Female | 16 | Left temporal lobe               | -8.592883017 | -5.417088398 | Oligodendroglioma | II  | Diffuse astrocytoma, IDH-wildtype     | -  | -  | +  |
| 217 | Male   | 57 | Left parietal lobe               | -6.907840891 | -4.812034377 | Glioblastoma      | IV  | Glioblastoma, IDH-wildtype            | -  | -  | -  |
| 218 | Female | 18 | Cerebellum                       | -9.114231122 | -5.607823398 | Astrocytoma       | II  | Diffuse astrocytoma, IDH-wildtype     | -  | -  | -  |
| 219 | Female | 32 | Right frontotemporal lobe        | -7.903050757 | -4.626428099 | Astrocytoma       | II  | Diffuse astrocytoma, IDH-wildtype     | -  | -  | -  |
| 220 | Female | 24 | Right thalamus                   | -8.23072667  | -3.591919524 | Glioblastoma      | IV  | Glioblastoma, IDH-wildtype            | -  | -  | -  |
| 221 | Female | 62 | Left frontotemporal lobe         | -8.668158985 | -4.398389813 | Oligoastrocytoma  | III | Anaplastic astrocytoma, IDH-wildtype  | -  | -  | -  |
| 222 | Male   | 64 | Thoracic spinal cord             | -7.83537742  | -10.76611476 | Astrocytoma       | II  | Diffuse astrocytoma, IDH-wildtype     | -  | -  | -  |
| 223 | Male   | 36 | Left frontal lobe                | -8.958797173 | -12.06599675 | Oligodendroglioma | II  | Oligodendroglioma, NOS                | NA | +  | -  |
| 224 | Male   | 50 | Left temporal lobe               | -7.298154868 | -2.853663343 | Glioblastoma      | IV  | Glioblastoma, IDH-wildtype            | -  | +  | -  |
| 225 | Male   | 18 | Thoracic and lumbar spinal cord  | -6.207084107 | -3.717041614 | Glioblastoma      | IV  | Glioblastoma, NOS                     | NA | -  | -  |
| 226 | Female | 26 | Left frontal lobe                | -7.118531198 | -4.116028853 | Astrocytoma       | II  | Diffuse astrocytoma, NOS              | NA | -  | -  |
| 227 | Female | 49 | Left temporal lobe               | -11.32948166 | -14.73406504 | Astrocytoma       | II  | Diffuse astrocytoma, IDH-mutant       | +  | -  | -  |
| 228 | Male   | 61 | Left temporal lobe               | -5.117320831 | -7.15942793  | Glioblastoma      | IV  | Glioblastoma, IDH-wildtype            | -  | +  | -  |
| 229 | Male   | 59 | Right frontal lobe               | -7.80280818  | -11.9792154  | Oligoastrocytoma  | II  | Diffuse astrocytoma, IDH-wildtype     | -  | +  | -  |
| 230 | Male   | 52 | Left temporal lobe               | -5.090360946 | -4.053166656 | Glioblastoma      | IV  | Glioblastoma, IDH-mutant              | +  | -  | +  |
| 231 | Female | 15 | Left parietal lobe               | -6.324165966 | -4.625599854 | Oligodendroglioma | III | Anaplastic oligodendroglioma, NOS     | -  | -  | -  |
| 232 | Female | 61 | Left fronto parietal lobe        | -6.455202372 | -12.50373389 | Oligodendroglioma | II  | ndroglioma, IDH-mutant and 1p/19q-cc  | +  | +  | +  |
| 233 | Male   | 46 | Left parietal lobe               | -8.080233502 | -5.701746874 | Oligoastrocytoma  | II  | Diffuse astrocytoma, IDH-wildtype     | -  | -  | -  |
| 234 | Female | 24 | Right parietal lobe              | -5.331956446 | -3.108421879 | Astrocytoma       | III | Anaplastic astrocytoma, IDH-wildtype  | -  | -  | -  |
| 235 | Female | 30 | Left frontal lobe                | -11.01634733 | -14.23222644 | Astrocytoma       | II  | Diffuse astrocytoma, IDH-wildtype     | -  | +  | +  |
| 236 | Male   | 42 | Left temporal parietal lobe      | -7.468739897 | -5.718743837 | NA                | III | NA                                    | -  | -  | -  |
| 237 | Female | 20 | Left frontal lobe                | -5.388583559 | -3.443626077 | Glioblastoma      | IV  | Glioblastoma, IDH-wildtype            | -  | -  | -  |
| 238 | Male   | 35 | Right frontal lobe               | -5.600599642 | -5.381797109 | NA                | III | NA                                    | -  | -  | -  |
| 239 | Female | 62 | Frontal lobe                     | -6.29099227  | -5.662224526 | Oligodendroglioma | II  | Oligodendroglioma, NOS                | NA | +  | +  |
| 240 | Male   | 38 | Right frontal lobe               | -5.176127159 | -5.53970082  | Astrocytoma       | III | Anaplastic astrocytoma, NOS           | NA | -  | -  |
| 241 | Female | 46 | Right frontal lobe               | -4.269724807 | -4.551376821 | NA                | III | NA                                    | -  | +  | NA |
| 242 | Male   | 43 | Left temporal lobe               | -5.801269576 | -6.330664922 | Glioblastoma      | IV  | Glioblastoma, NOS                     | NA | -  | -  |
| 243 | Male   | 60 | Left frontal lobe                | -5.514869068 | -4.910364914 | Glioblastoma      | IV  | Glioblastoma, IDH-wildtype            | -  | -  | +  |
| 244 | Female | 61 | Left frontal lobe                | -6.892305125 | -7.980115097 | Astrocytoma       | II  | Diffuse astrocytoma, IDH-wildtype     | -  | -  | -  |
| 245 | Female | 45 | Left temporal lobe               | -5.2066005   | -4.973628578 | Astrocytoma       | III | Anaplastic astrocytoma, NOS           | NA | -  | -  |
| 246 | Male   | 64 | Right temporal occipital lobe    | -5.285563072 | -3.767227489 | Glioblastoma      | IV  | Glioblastoma, IDH-wildtype            | -  | -  | +  |
| 247 | Male   | 78 | Left frontal lobe                | -5.378055344 | -3.426015518 | Glioblastoma      | IV  | Glioblastoma, IDH-wildtype            | -  | -  | -  |
| 248 | Female | 59 | Right frontal lobe               | -6.00479961  | -5.062791678 | Glioblastoma      | IV  | Glioblastoma, IDH-wildtype            | -  | -  | +  |
| 249 | Male   | 62 | Frontal lobe                     | -5.553234262 | -8.516592468 | Glioblastoma      | IV  | Glioblastoma, IDH-wildtype            | -  | -  | -  |
| 250 | Male   | 50 | Left frontal lobe                | -5.5495657   | -5.046290716 | Glioblastoma      | IV  | Glioblastoma, IDH-wildtype            | -  | -  | +  |
| 251 | Male   | 27 | Left frontal lobe                | -5.861085358 | -5.996487692 | Oligoastrocytoma  | III | Anaplastic astrocytoma, IDH-wildtype  | -  | -  | +  |
| 252 | Male   | 33 | Left temporal lobe               | -5.732195062 | -5.141300763 | Glioblastoma      | IV  | Glioblastoma, IDH-wildtype            | -  | +  | +  |
| 253 | Female | 73 | Right occipital lobe             | -5.633661596 | -5.525351073 | Glioblastoma      | IV  | Glioblastoma, IDH-wildtype            | -  | -  | -  |
| 254 | Male   | 59 | Right frontal lobe               | -6.141263688 | -6.627115884 | Glioblastoma      | IV  | Glioblastoma, IDH-wildtype            | -  | -  | -  |
| 255 | Male   | 36 | Right parietal lobe              | -5.974784327 | -4.737121682 | Glioblastoma      | IV  | Glioblastoma, IDH-wildtype            | -  | -  | +  |
| 256 | Male   | 49 | Left temporal lobe               | -4.864693628 | -4.399046678 | Glioblastoma      | IV  | Glioblastoma, IDH-mutant              | +  | -  | +  |
| 257 | Female | 47 | Right frontal lobe               | -5.742555243 | -5.566125973 | Astrocytoma       | II  | Diffuse astrocytoma, NOS              | NA | +  | -  |
| 258 | Male   | 36 | Right temporal lobe              | -9.846733218 | -11.05749566 | Astrocytoma       | II  | Diffuse astrocytoma, IDH-wildtype     | -  | -  | -  |
| 259 | Male   | 72 | Right occipital lobe             | -5.302874722 | -5.703268876 | Oligodendroglioma | III | Anaplastic oligodendroglioma, NOS     | NA | -  | -  |
| 260 | Male   | 62 | Right parietal occipital lobe    | -5.628570397 | -3.254506753 | Glioblastoma      | IV  | Glioblastoma, IDH-wildtype            | -  | -  | -  |
| 261 | Female | 25 | Left frontal lobe                | -5.852373278 | -7.684228062 | Glioblastoma      | IV  | Glioblastoma, NOS                     | NA | -  | -  |
| 262 | Male   | 42 | Right frontal lobe               | -12.03827321 | -12.30744365 | Astrocytoma       | II  | ndroglioma, IDH-mutant and 1p/19q-cc  | +  | +  | -  |
| 263 | Female | 51 | Right frontal lobe               | -10.11433509 | -10.50400629 | Astrocytoma       | II  | Diffuse astrocytoma, IDH-mutant       | +  | -  | -  |
| 264 | Male   | 11 | Posterior fossa                  | -5.240260641 | -5.207807743 | Glioblastoma      | IV  | Glioblastoma, IDH-wildtype            | -  | -  | -  |
| 265 | Male   | 37 | frontal lobe                     | -6.242160818 | -5.747731111 | Oligoastrocytoma  | II  | Diffuse astrocytoma, IDH-mutant       | +  | -  | -  |

|     |        |    |                               |              |              |                   |     |                                       |   |    |    |
|-----|--------|----|-------------------------------|--------------|--------------|-------------------|-----|---------------------------------------|---|----|----|
| 266 | Female | 39 | Right frontal lobe            | -5.891209119 | -3.772550222 | Glioblastoma      | IV  | Glioblastoma, IDH-wildtype            | - | -  | -  |
| 267 | Male   | 22 | Right thalamus                | -5.158075601 | -4.752234831 | Oligoastrocytoma  | III | Anaplastic astrocytoma, IDH-wildtype  | - | -  | -  |
| 268 | Female | 14 | Right parietal occipital lobe | -5.3094434   | -4.376848956 | Glioblastoma      | IV  | Glioblastoma, IDH-wildtype            | - | -  | -  |
| 269 | Male   | 52 | Left frontal lobe             | -4.540746628 | -4.637908376 | Glioblastoma      | IV  | Glioblastoma, IDH-mutant              | + | -  | -  |
| 270 | Male   | 51 | Left parietal occipital lobe  | -4.48210209  | -5.696392591 | Glioblastoma      | IV  | Glioblastoma, IDH-mutant              | + | +  | +  |
| 271 | Male   | 47 | Left frontal lobe             | -4.670021267 | -6.655103864 | Oligoastrocytoma  | II  | Oligodendroglioma, NOS                | - | +  | -  |
| 272 | Female | 46 | Left frontal lobe             | -6.021010449 | -6.303707325 | Oligodendroglioma | II  | Oligodendroglioma, NOS                | - | +  | +  |
| 273 | Male   | 45 | Left frontal lobe             | -3.735715001 | -6.985420472 | Glioblastoma      | IV  | Glioblastoma, IDH-wildtype            | + | -  | -  |
| 274 | Male   | 60 | Right frontal lobe            | -11.06446928 | -10.11184195 | Oligoastrocytoma  | II  | ndroglioma, IDH-mutant and 1p/19q-cc  | - | +  | +  |
| 275 | Male   | 70 | Left frontal lobe             | -5.335180479 | -3.258805219 | Glioblastoma      | IV  | Glioblastoma, IDH-wildtype            | - | -  | -  |
| 276 | Male   | 23 | Right fronto parietal lobe    | -6.217214688 | -6.264750618 | Astrocytoma       | II  | Diffuse astrocytoma, IDH-wildtype     | - | -  | -  |
| 277 | Female | 41 | Right frontotemporal lobe     | -7.759603695 | -4.626981453 | Oligoastrocytoma  | II  | Diffuse astrocytoma, IDH-wildtype     | - | -  | -  |
| 278 | Male   | 30 | Left frontal lobe             | -5.904924436 | -3.706648319 | Oligoastrocytoma  | II  | Diffuse astrocytoma, IDH-mutant       | + | -  | NA |
| 279 | Male   | 39 | Left frontotemporal lobe      | -5.922500884 | -4.56111753  | Oligodendroglioma | III | Anaplastic oligodendroglioma, NOS     | - | +  | +  |
| 280 | Male   | 77 | Right temporal lobe           | -5.564983459 | -7.393350617 | Glioblastoma      | IV  | Glioblastoma, IDH-wildtype            | - | -  | +  |
| 281 | Female | 42 | Left frontal lobe             | -4.725930278 | -6.436838386 | Oligodendroglioma | II  | Oligodendroglioma, NOS                | - | -  | -  |
| 282 | Male   | 56 | Left temporal lobe            | -5.407888799 | -4.823335731 | Astrocytoma       | III | Anaplastic astrocytoma, IDH-wildtype  | - | -  | -  |
| 283 | Female | 57 | Right temporal lobe           | -7.441516751 | -7.594796521 | Astrocytoma       | II  | Diffuse astrocytoma, IDH-wildtype     | - | -  | -  |
| 284 | Male   | 39 | Right frontal lobe            | -6.333303582 | -6.770417236 | Astrocytoma       | II  | Diffuse astrocytoma, IDH-wildtype     | - | -  | +  |
| 285 | Male   | 47 | Right frontotemporal lobe     | -6.357452733 | -3.394642307 | Glioblastoma      | IV  | Glioblastoma, IDH-wildtype            | - | -  | -  |
| 286 | Female | 38 | Right frontal lobe            | -7.418297635 | -5.465122313 | Astrocytoma       | II  | Diffuse astrocytoma, IDH-mutant       | + | -  | +  |
| 287 | Male   | 20 | Right temporal lobe           | -8.526201509 | -5.21772281  | Astrocytoma       | II  | Diffuse astrocytoma, IDH-wildtype     | - | -  | NA |
| 288 | Female | 47 | Right lateral ventricle       | -8.491853096 | -6.602946407 | Astrocytoma       | II  | Diffuse astrocytoma, IDH-wildtype     | - | -  | -  |
| 289 | Male   | 51 | Right frontal lobe            | -5.049007102 | -6.153462573 | Glioblastoma      | IV  | Glioblastoma, IDH-wildtype            | - | -  | -  |
| 290 | Female | 16 | Left cerebellum               | -8.691391539 | -7.580291294 | Astrocytoma       | II  | Diffuse astrocytoma, IDH-wildtype     | - | -  | -  |
| 291 | Female | 58 | Left temporal lobe            | -5.466347625 | -3.268543465 | Glioblastoma      | IV  | Glioblastoma, IDH-wildtype            | - | -  | -  |
| 292 | Male   | 57 | Right temporal lobe           | -4.807289941 | -3.797741696 | Glioblastoma      | IV  | Glioblastoma, IDH-wildtype            | - | +  | -  |
| 293 | Male   | 58 | Left frontal lobe             | -5.321878571 | -7.085339924 | Oligoastrocytoma  | III | Anaplastic astrocytoma, IDH-mutant    | + | -  | -  |
| 294 | Male   | 76 | Left parietal lobe            | -5.458772034 | -4.276210092 | Glioblastoma      | IV  | Glioblastoma, IDH-wildtype            | - | -  | -  |
| 295 | Male   | 71 | Right frontal lobe            | -5.930441905 | -5.871409009 | Glioblastoma      | IV  | Glioblastoma, IDH-wildtype            | - | -  | -  |
| 296 | Female | 43 | Right temporal parietal lobe  | -6.72615866  | -5.056610086 | Astrocytoma       | III | Anaplastic astrocytoma, IDH-wildtype  | - | -  | -  |
| 297 | Male   | 35 | Right parietal occipital lobe | -9.90518074  | -11.44847931 | NA                | II  | NA                                    | - | -  | -  |
| 298 | Male   | 49 | Left frontal lobe             | -5.65555797  | -5.492944188 | Glioblastoma      | IV  | Glioblastoma, IDH-wildtype            | - | -  | -  |
| 299 | Female | 34 | Right frontal lobe            | -5.894048865 | -5.914979076 | Astrocytoma       | II  | Diffuse astrocytoma, IDH-mutant       | + | -  | +  |
| 300 | Male   | 46 | Left frontal lobe             | -5.811524357 | -2.718120574 | Astrocytoma       | III | Anaplastic astrocytoma, IDH-mutant    | + | -  | -  |
| 301 | Male   | 25 | Right temporal lobe           | -5.905745218 | -3.744117919 | Astrocytoma       | III | Anaplastic astrocytoma, IDH-wildtype  | - | -  | +  |
| 302 | Male   | 61 | Left frontal lobe             | -4.695680704 | -6.049081629 | Glioblastoma      | IV  | Glioblastoma, IDH-wildtype            | - | -  | -  |
| 303 | Female | 40 | Left frontal lobe             | -6.665620002 | -7.142259768 | Astrocytoma       | II  | Diffuse astrocytoma, IDH-wildtype     | - | -  | -  |
| 304 | Female | 37 | Left frontal lobe             | -5.724536942 | -5.355889255 | NA                | III | NA                                    | - | -  | -  |
| 305 | Female | 25 | Right frontal lobe            | -5.784839109 | -5.147670734 | Oligodendroglioma | III | ligodendroglioma, IDH-mutant and 1p/1 | + | +  | NA |
| 306 | Female | 64 | Right fronto parietal lobe    | -5.293969912 | -4.412332661 | Glioblastoma      | IV  | Glioblastoma, IDH-wildtype            | - | -  | NA |
| 307 | Female | 33 | Left temporal lobe            | -6.313625799 | -3.526800313 | Glioblastoma      | IV  | Glioblastoma, IDH-wildtype            | - | -  | NA |
| 308 | Female | 47 | Right parietal occipital lobe | -6.414394516 | -4.557606475 | Astrocytoma       | III | Anaplastic astrocytoma, IDH-wildtype  | - | -  | NA |
| 309 | Female | 51 | Right temporal parietal lobe  | -5.088221526 | -7.195890544 | Glioblastoma      | IV  | Glioblastoma, IDH-wildtype            | - | -  | -  |
| 310 | Male   | 59 | Left frontal lobe             | -5.950362533 | -6.653097405 | Astrocytoma       | II  | Diffuse astrocytoma, IDH-wildtype     | - | -  | NA |
| 311 | Male   | 46 | Left frontal lobe             | -4.883828351 | -9.527128571 | Astrocytoma       | III | Anaplastic astrocytoma, IDH-mutant    | + | +  | NA |
| 312 | Female | 37 | Left frontal lobe             | -7.217689302 | -8.490570515 | Oligoastrocytoma  | II  | NA                                    | + | NA | +  |
| 313 | Female | 44 | Left Insular lobe             | -6.212496593 | -5.042839642 | Astrocytoma       | II  | Diffuse astrocytoma, IDH-wildtype     | - | NA | +  |
| 314 | Female | 41 | NA                            | -12.19991729 | -10.56709684 | Oligodendroglioma | II  | Oligodendroglioma, NOS                | - | NA | -  |
| 315 | Male   | 58 | Right parietal lobe           | -5.142542027 | -7.898504742 | Astrocytoma       | III | Anaplastic astrocytoma, IDH-wildtype  | - | NA | NA |
| 316 | Female | 37 | Left insular lobe             | -6.228975153 | -5.026603173 | Astrocytoma       | III | Anaplastic astrocytoma, IDH-wildtype  | - | NA | NA |
| 317 | Male   | 41 | Left temporal lobe            | -7.432311223 | -13.58415952 | NA                | III | NA                                    | - | -  | NA |
| 318 | Male   | 59 | Right occipital part          | -7.58228882  | -6.476964581 | Oligodendroglioma | II  | Oligodendroglioma, NOS                | - | +  | +  |
| 319 | Female | 73 | Right frontal lobe            | -5.443569337 | -4.691618396 | Glioblastoma      | IV  | Glioblastoma, IDH-wildtype            | - | +  | +  |
| 320 | Male   | 21 | Left frontal lobe             | -6.31954685  | -5.462433263 | Astrocytoma       | III | Anaplastic astrocytoma, IDH-wildtype  | - | -  | -  |
| 321 | Female | 49 | Right parietal occipital lobe | -5.714795464 | -8.418105115 | Astrocytoma       | III | Anaplastic astrocytoma, IDH-wildtype  | - | -  | +  |
| 322 | Male   | 40 | Bilateral frontal lobe        | -10.11271406 | -12.51576827 | Astrocytoma       | II  | ndroglioma, IDH-mutant and 1p/19q-cc  | + | +  | +  |
| 323 | Male   | 64 | Right temporal lobe           | -5.89040324  | -4.125590805 | Glioblastoma      | IV  | Glioblastoma, IDH-wildtype            | - | +  | -  |
| 324 | Female | 39 | Right insular lobe            | -5.890305319 | -8.449029902 | Astrocytoma       | III | Anaplastic astrocytoma, IDH-wildtype  | - | -  | -  |
| 325 | Male   | 58 | Right temporal occipital lobe | -5.18045411  | -5.251152051 | Glioblastoma      | IV  | Glioblastoma, IDH-wildtype            | - | -  | +  |
| 326 | Male   | 44 | Right frontal lobe            | -7.093315364 | -7.671757807 | Astrocytoma       | II  | Diffuse astrocytoma, IDH-mutant       | + | -  | -  |
| 327 | Male   | 61 | Right frontotemporal lobe     | -6.456140901 | -4.427996886 | Glioblastoma      | IV  | Glioblastoma, IDH-wildtype            | - | NA | +  |
| 328 | Male   | 46 | Right frontal lobe            | -5.895292176 | -7.756866263 | Glioblastoma      | IV  | Glioblastoma, IDH-wildtype            | - | -  | -  |
| 329 | Male   | 58 | Left frontotemporal lobe      | -6.049943945 | -4.672047593 | Oligodendroglioma | III | Anaplastic oligodendroglioma, NOS     | - | -  | -  |
| 330 | Male   | 68 | Left parietal lobe            | -6.734108971 | -4.590445889 | Glioblastoma      | IV  | Glioblastoma, IDH-wildtype            | - | -  | -  |
| 331 | Female | 27 | Right frontal lobe            | -6.121879649 | -6.945491787 | Oligoastrocytoma  | III | ligodendroglioma, IDH-mutant and 1p/1 | + | +  | +  |
| 332 | Female | 49 | Right frontal lobe            | -6.739146349 | -11.50973854 | Astrocytoma       | III | Anaplastic astrocytoma, IDH-wildtype  | - | -  | +  |

|     |        |    |                                       |              |              |                  |     |                                      |   |   |   |
|-----|--------|----|---------------------------------------|--------------|--------------|------------------|-----|--------------------------------------|---|---|---|
| 333 | Male   | 51 | Left frontal lobe                     | -5.274875983 | -3.680471037 | Oligoastrocytoma | III | Anaplastic astrocytoma, IDH-wildtype | - | - | + |
| 334 | Female | 24 | spinal cord                           | -6.833395034 | -5.466503558 | Oligoastrocytoma | II  | Diffuse astrocytoma, IDH-wildtype    | - | - | - |
| 335 | Male   | 67 | Right temporal lobe                   | -6.097132169 | -5.517712751 | Glioblastoma     | IV  | Glioblastoma, IDH-wildtype           | - | - | - |
| 336 | Female | 12 | 'ons, medulla oblongata and brainstem | -4.899889669 | -4.046833212 | Glioblastoma     | IV  | Glioblastoma, IDH-wildtype           | - | - | - |
| 337 | Female | 59 | Right frontotemporal lobe             | -6.045466513 | -4.499392709 | Glioblastoma     | IV  | Glioblastoma, IDH-wildtype           | - | - | + |
| 338 | Male   | 59 | Right temporal lobe                   | -6.276979437 | -6.71417292  | Glioblastoma     | IV  | Glioblastoma, IDH-wildtype           | - | - | - |

Supplementary Table 2: the clinicopathologic mutational and survival information of patients with glioma in TCGA dataset

| Sample       | Age | Gender | ASCL2 level | AT99B level | AT99B CNV | Histology | Grade | Integrated diagnosis       | Subtype            | Transcriptome.Subtype | survival time(days) | survival time(months) | status(0 survival:1 dead) | IDH.status | Chr.1p.19q.codeletion | MGMT.promoter.status | Chr.7.gain                     | Chr.10.loss | ATRX.status |
|--------------|-----|--------|-------------|-------------|-----------|-----------|-------|----------------------------|--------------------|-----------------------|---------------------|-----------------------|---------------------------|------------|-----------------------|----------------------|--------------------------------|-------------|-------------|
| TCGA.02.0047 | 78  | Male   | 3.930879235 | 5.80488735  | Gain      | GBM       | IV    | Glioblastoma, IDH-wildtype | LGm6-GBM           | ME                    | 441                 | 14.7                  | 1                         | WT         | non-codel             | Unmethylated         | No combined CNA                | WT          | WT          |
| TCGA.02.0055 | 62  | Female | 3.74353651  | 4.05951103  | Gain      | GBM       | IV    | Glioblastoma, IDH-wildtype | Mesenchymal-like   | ME                    | 75                  | 2.5                   | 1                         | WT         | non-codel             | Unmethylated         | No combined CNA                | WT          | WT          |
| TCGA.02.2483 | 43  | Male   | 4.542059898 | 4.964828327 | diploid   | GBM       | IV    | Glioblastoma, IDH-mutant   | G-CIMP-low         | PN                    | 459                 | 15.3                  | 0                         | Mutant     | non-codel             | Methylated           | No combined CNA                | Mutant      | WT          |
| TCGA.02.2486 | 53  | Male   | 3.181325221 | 4.31883019  | Gain      | GBM       | IV    | Glioblastoma, IDH-wildtype | Classic-like       | CL                    | 462                 | 15.4                  | 0                         | WT         | non-codel             | Unmethylated         | Gain chr 7 & gain; loss chr 10 | WT          | WT          |
| TCGA.02.2495 | 64  | Male   | 5.164540928 | 3.126262564 | Gain      | GBM       | IV    | Glioblastoma, IDH-wildtype | Classic-like       | ME                    | 609                 | 20.3                  | 1                         | WT         | non-codel             | Unmethylated         | Gain chr 7 & gain; loss chr 10 | WT          | WT          |
| TCGA.06.0125 | 63  | Female | 1.559022674 | 4.89962004  | Gain      | GBM       | IV    | Glioblastoma, IDH-wildtype | Classic-like       | CL                    | 1428                | 47.6                  | 1                         | WT         | non-codel             | Methylated           | No combined CNA                | WT          | WT          |
| TCGA.06.0129 | 73  | Male   | 5.38115135  | 4.40891166  | diploid   | GBM       | IV    | Glioblastoma, IDH-mutant   | G-CIMP-low         | PN                    | 1011                | 33.7                  | 1                         | Mutant     | non-codel             | Methylated           | No combined CNA                | Mutant      | WT          |
| TCGA.06.0130 | 54  | Male   | 6.244059327 | 3.302436041 | Gain      | GBM       | IV    | Glioblastoma, IDH-wildtype | Mesenchymal-like   | ME                    | 387                 | 12.9                  | 1                         | WT         | non-codel             | Unmethylated         | No combined CNA                | WT          | WT          |
| TCGA.06.0132 | 49  | Male   | 5.311208821 | 5.090455449 | Gain      | GBM       | IV    | Glioblastoma, IDH-wildtype | Classic-like       | NE                    | 762                 | 25.4                  | 1                         | WT         | non-codel             | Unmethylated         | No combined CNA                | WT          | WT          |
| TCGA.06.0138 | 43  | Male   | 5.267149979 | 6.150259084 | Gain      | GBM       | IV    | Glioblastoma, IDH-wildtype | Classic-like       | ME                    | 726                 | 24.2                  | 1                         | WT         | non-codel             | Unmethylated         | Gain chr 7 & gain; loss chr 10 | WT          | WT          |
| TCGA.06.0141 | 62  | Male   | 4.496583763 | 6.601194338 | Gain      | GBM       | IV    | Glioblastoma, IDH-wildtype | LGm6-GBM           | ME                    | 309                 | 10.3                  | 1                         | WT         | non-codel             | Unmethylated         | No combined CNA                | WT          | WT          |
| TCGA.06.0156 | 57  | Male   | 3.823494625 | 7.893842705 | NA        | GBM       | IV    | Glioblastoma, IDH-wildtype | Classic-like       | ME                    | 174                 | 5.8                   | 1                         | Mutant     | non-codel             | Unmethylated         | No combined CNA                | WT          | WT          |
| TCGA.06.0157 | 63  | Female | 4.081936082 | 4.620955834 | Gain      | GBM       | IV    | Glioblastoma, IDH-wildtype | Classic-like       | CL                    | 96                  | 3.2                   | 1                         | WT         | non-codel             | Unmethylated         | Gain chr 7 & gain; loss chr 10 | WT          | WT          |
| TCGA.06.0158 | 73  | Male   | 4.750767272 | 4.05736183  | diploid   | GBM       | IV    | Glioblastoma, IDH-wildtype | Classic-like       | CL                    | 324                 | 10.8                  | 1                         | WT         | non-codel             | Unmethylated         | No combined CNA                | WT          | WT          |
| TCGA.06.0168 | 59  | Female | 5.125308074 | 4.87657097  | Gain      | GBM       | IV    | Glioblastoma, IDH-wildtype | Classic-like       | ME                    | 591                 | 19.7                  | 1                         | WT         | non-codel             | Unmethylated         | Gain chr 7 & gain; loss chr 10 | WT          | WT          |
| TCGA.06.0174 | 54  | Male   | 2.918386234 | 6.748592723 | Gain      | GBM       | IV    | Glioblastoma, IDH-wildtype | Classic-like       | PN                    | 96                  | 3.2                   | 1                         | WT         | non-codel             | Unmethylated         | Gain chr 7 & gain; loss chr 10 | WT          | WT          |
| TCGA.06.0178 | 38  | Male   | 4.73545719  | 4.322779034 | diploid   | GBM       | IV    | Glioblastoma, IDH-mutant   | Classic-like       | PN                    | 2643                | 88.1                  | 1                         | Mutant     | non-codel             | Unmethylated         | No combined CNA                | WT          | WT          |
| TCGA.06.0184 | 63  | Male   | 5.914882589 | 3.60844261  | Gain      | GBM       | IV    | Glioblastoma, IDH-wildtype | Classic-like       | ME                    | 2097                | 69.9                  | 1                         | WT         | non-codel             | Unmethylated         | Gain chr 7 & gain; loss chr 10 | WT          | WT          |
| TCGA.06.0187 | 69  | Male   | 3.469899997 | 5.502212834 | Gain      | GBM       | IV    | Glioblastoma, IDH-wildtype | Classic-like       | CL                    | 816                 | 27.2                  | 1                         | WT         | non-codel             | Unmethylated         | No combined CNA                | WT          | WT          |
| TCGA.06.0190 | 62  | Male   | 4.810913242 | 5.985461052 | Gain      | GBM       | IV    | Glioblastoma, IDH-wildtype | Classic-like       | ME                    | 312                 | 10.4                  | 1                         | WT         | non-codel             | Unmethylated         | Gain chr 7 & gain; loss chr 10 | WT          | WT          |
| TCGA.06.0210 | 73  | Female | 4.503782229 | 6.55011416  | Gain      | GBM       | IV    | Glioblastoma, IDH-wildtype | Classic-like       | ME                    | 222                 | 7.4                   | 1                         | WT         | non-codel             | Unmethylated         | Gain chr 7 & gain; loss chr 10 | WT          | WT          |
| TCGA.06.0211 | 47  | Male   | 3.895176574 | 3.59489485  | Gain      | GBM       | IV    | Glioblastoma, IDH-wildtype | Classic-like       | CL                    | 354                 | 11.8                  | 1                         | WT         | non-codel             | Unmethylated         | Gain chr 7 & gain; loss chr 10 | WT          | WT          |
| TCGA.06.0219 | 67  | Male   | 4.327162783 | 4.824375819 | diploid   | GBM       | IV    | Glioblastoma, IDH-wildtype | Classic-like       | NE                    | 21                  | 0.7                   | 1                         | WT         | non-codel             | Unmethylated         | No combined CNA                | WT          | WT          |
| TCGA.06.0238 | 46  | Male   | 5.060566245 | 7.16437298  | Gain      | GBM       | IV    | Glioblastoma, IDH-wildtype | Classic-like       | PN                    | 399                 | 13.3                  | 1                         | WT         | non-codel             | Unmethylated         | Gain chr 7 & gain; loss chr 10 | WT          | WT          |
| TCGA.06.0644 | 71  | Male   | 3.421559945 | 5.236182616 | Gain      | GBM       | IV    | Glioblastoma, IDH-wildtype | Classic-like       | ME                    | 378                 | 12.6                  | 1                         | WT         | non-codel             | Unmethylated         | Gain chr 7 & gain; loss chr 10 | WT          | WT          |
| TCGA.06.0645 | 55  | Female | 5.129315992 | 5.121102458 | Gain      | GBM       | IV    | Glioblastoma, IDH-wildtype | Classic-like       | ME                    | 174                 | 5.8                   | 1                         | WT         | non-codel             | Unmethylated         | Gain chr 7 & gain; loss chr 10 | WT          | WT          |
| TCGA.06.0646 | 60  | Male   | 4.759773695 | 7.189487561 | Gain      | GBM       | IV    | Glioblastoma, IDH-wildtype | Classic-like       | ME                    | 174                 | 5.8                   | 1                         | WT         | non-codel             | Unmethylated         | Gain chr 7 & gain; loss chr 10 | WT          | WT          |
| TCGA.06.0649 | 73  | Female | 4.79215257  | 9.478227622 | Gain      | GBM       | IV    | Glioblastoma, IDH-wildtype | Classic-like       | ME                    | 626                 | 21.2                  | 1                         | WT         | non-codel             | Unmethylated         | Gain chr 7 & gain; loss chr 10 | WT          | WT          |
| TCGA.06.0686 | 53  | Male   | 4.09985243  | 8.067835517 | Gain      | GBM       | IV    | Glioblastoma, IDH-wildtype | Classic-like       | PN                    | 43                  | 1.1                   | 1                         | WT         | non-codel             | Unmethylated         | Gain chr 7 & gain; loss chr 10 | WT          | WT          |
| TCGA.06.0743 | 69  | Male   | 4.291154119 | 6.49815511  | Gain      | GBM       | IV    | Glioblastoma, IDH-wildtype | Classic-like       | CL                    | 792                 | 26.4                  | 1                         | WT         | non-codel             | Unmethylated         | Gain chr 7 & gain; loss chr 10 | WT          | WT          |
| TCGA.06.0744 | 66  | Male   | 4.752994728 | 4.62684794  | Gain      | GBM       | IV    | Glioblastoma, IDH-wildtype | Classic-like       | CL                    | 1407                | 46.9                  | 1                         | WT         | non-codel             | Unmethylated         | Gain chr 7 & gain; loss chr 10 | WT          | WT          |
| TCGA.06.0745 | 59  | Male   | 5.59819546  | 7.209464088 | Gain      | GBM       | IV    | Glioblastoma, IDH-wildtype | Classic-like       | ME                    | 237                 | 7.9                   | 1                         | WT         | non-codel             | Unmethylated         | Gain chr 7 & gain; loss chr 10 | WT          | WT          |
| TCGA.06.0747 | 53  | Male   | 3.038102511 | 3.993983426 | Gain      | GBM       | IV    | Glioblastoma, IDH-wildtype | Classic-like       | CL                    | 81                  | 2.7                   | 1                         | WT         | non-codel             | Unmethylated         | No combined CNA                | WT          | WT          |
| TCGA.06.0748 | 50  | Male   | 6.030035854 | 6.498212565 | Gain      | GBM       | IV    | Glioblastoma, IDH-wildtype | Classic-like       | NE                    | 81                  | 2.7                   | 1                         | WT         | non-codel             | Unmethylated         | Gain chr 7 & gain; loss chr 10 | WT          | WT          |
| TCGA.06.0750 | 43  | Male   | 4.515434926 | 6.52925557  | Gain      | GBM       | IV    | Glioblastoma, IDH-wildtype | Classic-like       | ME                    | 27                  | 0.9                   | 1                         | WT         | non-codel             | Unmethylated         | Gain chr 7 & gain; loss chr 10 | WT          | WT          |
| TCGA.06.0878 | 74  | Male   | 4.754785976 | 4.907284878 | Gain      | GBM       | IV    | Glioblastoma, IDH-wildtype | Mesenchymal-like   | ME                    | 216                 | 7.2                   | 0                         | WT         | non-codel             | Unmethylated         | Gain chr 7 & gain; loss chr 10 | WT          | WT          |
| TCGA.06.0882 | 30  | Male   | 5.302077729 | 4.639423198 | Gain      | GBM       | IV    | Glioblastoma, IDH-wildtype | LGm6-GBM           | ME                    | 624                 | 20.8                  | 1                         | WT         | non-codel             | Unmethylated         | Gain chr 7 & gain; loss chr 10 | WT          | WT          |
| TCGA.06.1804 | 81  | Female | 3.471889774 | 5.459316854 | Gain      | GBM       | IV    | Glioblastoma, IDH-wildtype | Classic-like       | GBM                   | 408                 | 13.6                  | 1                         | WT         | non-codel             | Methylated           | Gain chr 7 & gain; loss chr 10 | WT          | WT          |
| TCGA.06.2557 | 76  | Male   | 5.489921799 | 4.21347282  | Gain      | GBM       | IV    | Glioblastoma, IDH-wildtype | Classic-like       | ME                    | 33                  | 1.1                   | 1                         | WT         | non-codel             | Unmethylated         | No combined CNA                | WT          | WT          |
| TCGA.06.2558 | 75  | Female | 3.65777718  | 6.454953962 | Gain      | GBM       | IV    | Glioblastoma, IDH-wildtype | Mesenchymal-like   | PN                    | 375                 | 12.5                  | 1                         | WT         | non-codel             | Unmethylated         | Gain chr 7 & gain; loss chr 10 | WT          | WT          |
| TCGA.06.2559 | 83  | Male   | 3.925097452 | 6.779452785 | Gain      | GBM       | IV    | Glioblastoma, IDH-wildtype | Mesenchymal-like   | ME                    | 147                 | 4.9                   | 1                         | WT         | non-codel             | Methylated           | No combined CNA                | WT          | WT          |
| TCGA.06.2561 | 53  | Female | 3.973730653 | 4.711880308 | Gain      | GBM       | IV    | Glioblastoma, IDH-wildtype | Mesenchymal-like   | ME                    | 528                 | 17.6                  | 1                         | WT         | non-codel             | Unmethylated         | Gain chr 7 & gain; loss chr 10 | WT          | WT          |
| TCGA.06.2562 | 81  | Male   | 4.093357346 | 6.591064501 | Gain      | GBM       | IV    | Glioblastoma, IDH-wildtype | Classic-like       | ME                    | 378                 | 12.6                  | 1                         | WT         | non-codel             | Unmethylated         | Gain chr 7 & gain; loss chr 10 | WT          | WT          |
| TCGA.06.2563 | 72  | Female | 4.089091319 | 4.018162337 | Gain      | GBM       | IV    | Glioblastoma, IDH-wildtype | Classic-like       | CL                    | 918                 | 30.6                  | 0                         | WT         | non-codel             | Methylated           | Gain chr 7 & gain; loss chr 10 | WT          | WT          |
| TCGA.06.2564 | 50  | Male   | 4.892629027 | 4.176242975 | Gain      | GBM       | IV    | Glioblastoma, IDH-wildtype | Mesenchymal-like   | CL                    | 180                 | 6.6                   | 0                         | WT         | non-codel             | Unmethylated         | Gain chr 7 & gain; loss chr 10 | WT          | WT          |
| TCGA.06.2565 | 59  | Male   | 3.728475649 | 4.635882058 | diploid   | GBM       | IV    | Glioblastoma, IDH-wildtype | Classic-like       | CL                    | 498                 | 16.6                  | 1                         | WT         | non-codel             | Methylated           | No combined CNA                | WT          | WT          |
| TCGA.06.2567 | 65  | Male   | 4.918977694 | 4.393155317 | Gain      | GBM       | IV    | Glioblastoma, IDH-wildtype | Mesenchymal-like   | ME                    | 132                 | 4.4                   | 1                         | WT         | non-codel             | Methylated           | Gain chr 7 & gain; loss chr 10 | WT          | WT          |
| TCGA.06.2569 | 24  | Female | 1.255742421 | 2.837014778 | NA        | GBM       | IV    | Glioblastoma, IDH-wildtype | LGm6-GBM           | ME                    | 12                  | 0.4                   | 0                         | WT         | non-codel             | Unmethylated         | No combined CNA                | Mutant      | WT          |
| TCGA.06.2570 | 21  | Female | 4.451026435 | 5.523819109 | diploid   | GBM       | IV    | Glioblastoma, IDH-mutant   | G-CIMP-low         | PN                    | 945                 | 31.5                  | 0                         | Mutant     | non-codel             | Unmethylated         | No combined CNA                | Mutant      | WT          |
| TCGA.06.5408 | 54  | Female | 3.635417762 | 6.40087017  | Gain      | GBM       | IV    | Glioblastoma, IDH-wildtype | Mesenchymal-like   | CL                    | 351                 | 11.7                  | 1                         | WT         | non-codel             | Unmethylated         | Gain chr 7 & gain; loss chr 10 | WT          | WT          |
| TCGA.06.5410 | 72  | Female | 5.389621875 | 4.083734275 | Gain      | GBM       | IV    | Glioblastoma, IDH-wildtype | LGm6-GBM           | ME                    | 105                 | 3.5                   | 1                         | WT         | non-codel             | Methylated           | No combined CNA                | WT          | WT          |
| TCGA.06.5411 | 51  | Male   | 3.209094597 | 6.697102403 | Gain      | GBM       | IV    | Glioblastoma, IDH-wildtype | Mesenchymal-like   | NE                    | 249                 | 8.3                   | 1                         | WT         | non-codel             | Unmethylated         | Gain chr 7 & gain; loss chr 10 | WT          | WT          |
| TCGA.06.5412 | 78  | Female | 4.810288852 | 5.412734112 | Gain      | GBM       | IV    | Glioblastoma, IDH-wildtype | Mesenchymal-like   | ME                    | 135                 | 4.5                   | 1                         | WT         | non-codel             | Methylated           | No combined CNA                | WT          | WT          |
| TCGA.06.5413 | 67  | Male   | 3.500598124 | 7.996098949 | Gain      | GBM       | IV    | Glioblastoma, IDH-wildtype | Classic-like       | ME                    | 264                 | 8.8                   | 0                         | WT         | non-codel             | Unmethylated         | Gain chr 7 & gain; loss chr 10 | WT          | WT          |
| TCGA.06.5414 | 61  | Male   | 3.706408998 | 1.780100084 | Gain      | GBM       | IV    | Glioblastoma, IDH-wildtype | Classic-like       | CL                    | 270                 | 9                     | 0                         | WT         | non-codel             | Unmethylated         | Gain chr 7 & gain; loss chr 10 | WT          | WT          |
| TCGA.06.5415 | 60  | Male   | 3.608915667 | 5.094058678 | Gain      | GBM       | IV    | Glioblastoma, IDH-wildtype | Classic-like       | CL                    | 258                 | 8.6                   | 0                         | WT         | non-codel             | Unmethylated         | Gain chr 7 & gain; loss chr 10 | WT          | WT          |
| TCGA.06.5416 | 23  | Female | -1          | 7.644830401 | diploid   | GBM       | IV    | Glioblastoma, NOS          | Classic-like       | PN                    | 201                 | 6.7                   | 0                         | WT         | non-codel             | Unmethylated         | No combined CNA                | WT          | WT          |
| TCGA.06.5417 | 45  | Female | 1.268075023 | 2.109962253 | NA        | GBM       | IV    | Glioblastoma, IDH-mutant   | Classic-like       | CL                    | 153                 | 5.1                   | 0                         | Mutant     | non-codel             | Methylated           | No combined CNA                | Mutant      | WT          |
| TCGA.06.5418 | 75  | Female | 3.74453787  | 5.911418355 | Gain      | GBM       | IV    | Glioblastoma, IDH-wildtype | Mesenchymal-like</ |                       |                     |                       |                           |            |                       |                      |                                |             |             |

|              |    |        |             |             |         |             |     |                                      |                  |    |      |      |    |           |           |              |                          |        |
|--------------|----|--------|-------------|-------------|---------|-------------|-----|--------------------------------------|------------------|----|------|------|----|-----------|-----------|--------------|--------------------------|--------|
| TCGA.16.1045 | 49 | Female | 5.119684025 | 4.88462234  | Gain    | GBM         | IV  | Glioblastoma, IDH-wildtype           | Mesenchymal-like | ME | 870  | 29   | 1  | WT        | non-codel | Methylated   | Gain chr 7 & loss chr 10 | WT     |
| TCGA.19.1390 | 63 | Female | 3.301880253 | 7.369502254 | Gain    | GBM         | IV  | Glioblastoma, IDH-wildtype           | Classic-like     | PN | 762  | 25.4 | 1  | WT        | non-codel | Methylated   | No combined CNA          | WT     |
| TCGA.19.1787 | 48 | Male   | 5.14501301  | 2.361263047 | Gain    | GBM         | IV  | Glioblastoma, NOS                    | Classic-like     | ME | 381  | 12.7 | 1  | non-codel | non-codel | Methylated   | Gain chr 7 & loss chr 10 | WT     |
| TCGA.19.2619 | 55 | Female | 2.560397037 | 5.042215317 | Gain    | GBM         | IV  | Glioblastoma, IDH-wildtype           | Mesenchymal-like | CL | 297  | 9.7  | 0  | WT        | non-codel | Methylated   | Gain chr 7 & loss chr 10 | WT     |
| TCGA.19.2620 | 70 | Male   | 3.271649772 | 4.40834118  | Gain    | GBM         | IV  | Glioblastoma, IDH-wildtype           | Classic-like     | CL | 141  | 4.9  | 1  | WT        | non-codel | Methylated   | No combined CNA          | WT     |
| TCGA.19.2624 | 51 | Male   | 2.074950644 | 7.166912236 | Gain    | GBM         | IV  | Glioblastoma, IDH-wildtype           | Mesenchymal-like | CL | 6    | 0.2  | 1  | WT        | non-codel | Unmethylated | Gain chr 7 & loss chr 10 | WT     |
| TCGA.19.2625 | 76 | Female | 4.355749269 | 5.55995298  | diploid | GBM         | IV  | Glioblastoma, IDH-wildtype           | Mesenchymal-like | ME | 123  | 4.1  | 1  | WT        | non-codel | Unmethylated | No combined CNA          | WT     |
| TCGA.19.2629 | 60 | Male   | 4.987207156 | 2.171270889 | Gain    | GBM         | IV  | Glioblastoma, IDH-mutant             | G-CIMP-low       | ME | 726  | 24.2 | 1  | Mutant    | non-codel | Unmethylated | No combined CNA          | Mutant |
| TCGA.19.4065 | 36 | Male   | 4.176269915 | 6.055451644 | Gain    | GBM         | IV  | Glioblastoma, NOS                    | Classic-like     | ME | 210  | 7.7  | 0  | WT        | non-codel | Unmethylated | Gain chr 7 & loss chr 10 | WT     |
| TCGA.19.5960 | 56 | Male   | 3.129394953 | 4.821051976 | Gain    | GBM         | IV  | Glioblastoma, IDH-wildtype           | Classic-like     | CL | 450  | 15   | 1  | WT        | non-codel | Unmethylated | Gain chr 7 & loss chr 10 | WT     |
| TCGA.26.1442 | 43 | Male   | 2.971111255 | 4.381705597 | Gain    | GBM         | IV  | Glioblastoma, IDH-mutant             | G-CIMP-high      | CL | 939  | 31.3 | 0  | Mutant    | non-codel | Methylated   | No combined CNA          | WT     |
| TCGA.26.5132 | 74 | Male   | 4.042189046 | 5.119908091 | Gain    | GBM         | IV  | Glioblastoma, IDH-wildtype           | Classic-like     | ME | 282  | 9.4  | 0  | WT        | non-codel | Methylated   | Gain chr 7 & loss chr 10 | WT     |
| TCGA.26.5133 | 59 | Male   | 2.911269736 | 2.400674542 | diploid | GBM         | IV  | Glioblastoma, IDH-wildtype           | LGM6-GBM         | ME | 447  | 14.9 | 0  | WT        | non-codel | Unmethylated | No combined CNA          | WT     |
| TCGA.26.5134 | 74 | Male   | 3.891837158 | 5.908073121 | diploid | GBM         | IV  | Glioblastoma, IDH-wildtype           | Mesenchymal-like | ME | 165  | 5.5  | 0  | WT        | non-codel | Unmethylated | No combined CNA          | WT     |
| TCGA.26.5135 | 72 | Female | 4.187569822 | 6.62223782  | Gain    | GBM         | IV  | Glioblastoma, IDH-wildtype           | Mesenchymal-like | ME | 267  | 8.9  | 1  | WT        | non-codel | Methylated   | Gain chr 7 & loss chr 10 | WT     |
| TCGA.26.5136 | 78 | Female | 5.417255065 | 6.310500088 | Gain    | GBM         | IV  | Glioblastoma, IDH-wildtype           | Mesenchymal-like | ME | 570  | 19   | 1  | WT        | non-codel | Methylated   | Gain chr 7 & loss chr 10 | WT     |
| TCGA.26.5139 | 65 | Female | 3.564841513 | 6.175911769 | Gain    | GBM         | IV  | Glioblastoma, IDH-wildtype           | Mesenchymal-like | CL | 48   | 1.6  | 0  | WT        | non-codel | Unmethylated | Gain chr 7 & loss chr 10 | WT     |
| TCGA.27.1830 | 57 | Male   | 3.811645705 | 6.528916637 | Gain    | GBM         | IV  | Glioblastoma, IDH-wildtype           | Mesenchymal-like | ME | 153  | 5.1  | 1  | WT        | non-codel | Unmethylated | Gain chr 7 & loss chr 10 | WT     |
| TCGA.27.1831 | 66 | Male   | 3.860893293 | 4.477377919 | Gain    | GBM         | IV  | Glioblastoma, IDH-wildtype           | Mesenchymal-like | ME | 198  | 6.6  | 1  | WT        | non-codel | Unmethylated | Gain chr 7 & loss chr 10 | WT     |
| TCGA.27.1832 | 59 | Female | 5.005103513 | 7.028342608 | Gain    | GBM         | IV  | Glioblastoma, IDH-wildtype           | Mesenchymal-like | ME | 297  | 9.9  | 1  | WT        | non-codel | Unmethylated | Gain chr 7 & loss chr 10 | WT     |
| TCGA.27.1834 | 56 | Male   | 4.92680122  | 7.761210796 | Gain    | GBM         | IV  | Glioblastoma, IDH-wildtype           | Mesenchymal-like | ME | 1215 | 36.5 | 1  | WT        | non-codel | Methylated   | Gain chr 7 & loss chr 10 | WT     |
| TCGA.27.1835 | 53 | Female | 2.975941948 | 4.526813761 | Gain    | GBM         | IV  | Glioblastoma, IDH-wildtype           | Mesenchymal-like | CL | 639  | 20.3 | 1  | WT        | non-codel | Methylated   | Gain chr 7 & loss chr 10 | WT     |
| TCGA.27.1837 | 36 | Male   | 4.436401735 | 5.237371192 | Gain    | GBM         | IV  | Glioblastoma, IDH-wildtype           | Mesenchymal-like | CL | 420  | 14   | 1  | WT        | non-codel | Methylated   | No combined CNA          | WT     |
| TCGA.27.1839 | 48 | Male   | 4.14434946  | 8.817570750 | Gain    | GBM         | IV  | Glioblastoma, IDH-wildtype           | Mesenchymal-like | ME | 312  | 10.3 | 1  | WT        | non-codel | Unmethylated | Gain chr 7 & loss chr 10 | WT     |
| TCGA.27.2521 | 34 | Male   | 2.418540795 | 3.575529373 | Gain    | GBM         | IV  | Glioblastoma, IDH-mutant             | G-CIMP-high      | PN | 430  | 10.4 | 0  | Mutant    | non-codel | Methylated   | No combined CNA          | Mutant |
| TCGA.27.2523 | 63 | Male   | 3.194228919 | 5.547327707 | Gain    | GBM         | IV  | Glioblastoma, IDH-wildtype           | Classic-like     | CL | 483  | 16.1 | 1  | WT        | non-codel | Methylated   | Gain chr 7 & loss chr 10 | WT     |
| TCGA.27.2524 | 56 | Male   | 4.870206878 | 5.995957048 | Gain    | GBM         | IV  | Glioblastoma, IDH-wildtype           | Mesenchymal-like | ME | 228  | 7.6  | 1  | WT        | non-codel | Unmethylated | Gain chr 7 & loss chr 10 | WT     |
| TCGA.27.2526 | 79 | Female | 4.893046647 | 3.746452514 | Gain    | GBM         | IV  | Glioblastoma, IDH-wildtype           | Mesenchymal-like | CL | 87   | 2.9  | 1  | WT        | non-codel | Unmethylated | No combined CNA          | WT     |
| TCGA.27.2528 | 62 | Male   | 1.265376883 | 10.30281151 | Gain    | GBM         | IV  | Glioblastoma, IDH-wildtype           | Classic-like     | CL | 474  | 15.8 | 1  | WT        | non-codel | Methylated   | No combined CNA          | WT     |
| TCGA.28.1747 | 44 | Male   | 4.98952315  | 4.022962525 | Gain    | GBM         | IV  | Glioblastoma, IDH-wildtype           | Mesenchymal-like | CL | 75   | 2.5  | 1  | WT        | non-codel | Methylated   | No combined CNA          | WT     |
| TCGA.28.1753 | 53 | Male   | 4.141514537 | 5.347467237 | Gain    | GBM         | IV  | Glioblastoma, IDH-wildtype           | Mesenchymal-like | ME | 36   | 1.2  | 0  | WT        | non-codel | Unmethylated | Gain chr 7 & loss chr 10 | WT     |
| TCGA.28.2499 | 59 | Male   | 3.591057019 | 4.151406991 | NA      | GBM         | IV  | Glioblastoma, IDH-wildtype           | Classic-like     | CL | 3    | 3.1  | 0  | WT        | non-codel | Unmethylated | Gain chr 7 & loss chr 10 | WT     |
| TCGA.28.2509 | 77 | Female | 4.04719809  | 6.63659621  | Gain    | GBM         | IV  | Glioblastoma, IDH-wildtype           | Classic-like     | ME | 144  | 4.8  | 0  | WT        | non-codel | Methylated   | Gain chr 7 & loss chr 10 | WT     |
| TCGA.28.2510 |    |        | 3.097593943 | 6.250400753 | Gain    | GBM         | IV  | Glioblastoma, IDH-wildtype           | LGM6-GBM         | NE | 0    | 0    | WT | non-codel | non-codel | Unmethylated | No combined CNA          | WT     |
| TCGA.28.2513 | 69 | Female | 4.641933329 | 5.708347281 | Gain    | GBM         | IV  | Glioblastoma, IDH-wildtype           | Mesenchymal-like | ME | 219  | 7.3  | 0  | WT        | non-codel | Unmethylated | Gain chr 7 & loss chr 10 | WT     |
| TCGA.28.2514 | 45 | Male   | 3.210045919 | 7.185743673 | diploid | GBM         | IV  | Glioblastoma, IDH-wildtype           | Mesenchymal-like | CL | 159  | 5.3  | 0  | WT        | non-codel | Unmethylated | No combined CNA          | WT     |
| TCGA.28.5204 | 72 | Male   | 3.993737756 | 5.479676907 | Gain    | GBM         | IV  | Glioblastoma, IDH-wildtype           | Classic-like     | CL | 447  | 14.9 | 1  | WT        | non-codel | Unmethylated | Gain chr 7 & loss chr 10 | WT     |
| TCGA.28.5207 | 71 | Male   | 3.630200981 | 4.793287263 | Gain    | GBM         | IV  | Glioblastoma, IDH-wildtype           | Mesenchymal-like | CL | 339  | 11.3 | 1  | WT        | non-codel | Unmethylated | Gain chr 7 & loss chr 10 | WT     |
| TCGA.28.5208 | 52 | Male   | 3.984197409 | 3.464825073 | diploid | GBM         | IV  | Glioblastoma, IDH-wildtype           | Classic-like     | CL | 537  | 17.9 | 1  | WT        | non-codel | Methylated   | No combined CNA          | WT     |
| TCGA.28.5209 | 66 | Female | 3.300123725 | 4.74990428  | Gain    | GBM         | IV  | Glioblastoma, IDH-wildtype           | Classic-like     | CL | 75   | 2.5  | 0  | WT        | non-codel | Methylated   | Gain chr 7 & loss chr 10 | WT     |
| TCGA.28.5213 | 72 | Male   | 5.220511828 | 4.652245548 | Gain    | GBM         | IV  | Glioblastoma, IDH-wildtype           | Mesenchymal-like | ME | 939  | 31.3 | 0  | WT        | non-codel | Unmethylated | Gain chr 7 & loss chr 10 | WT     |
| TCGA.28.5215 | 62 | Female | 3.438465858 | 6.614915929 | Gain    | GBM         | IV  | Glioblastoma, IDH-wildtype           | Mesenchymal-like | PN | 330  | 11.1 | 1  | WT        | non-codel | Methylated   | No combined CNA          | WT     |
| TCGA.28.5216 | 52 | Male   | 3.985664364 | 6.87572692  | diploid | GBM         | IV  | Glioblastoma, IDH-wildtype           | Mesenchymal-like | ME | 408  | 13.6 | 0  | WT        | non-codel | Unmethylated | No combined CNA          | WT     |
| TCGA.28.5218 | 63 | Male   | 5.469934803 | 4.689805606 | Gain    | GBM         | IV  | Glioblastoma, IDH-wildtype           | LGM6-GBM         | ME | 156  | 5.2  | 1  | WT        | non-codel | Unmethylated | No combined CNA          | WT     |
| TCGA.28.5220 | 67 | Male   | 4.744198777 | 7.25040248  | Gain    | GBM         | IV  | Glioblastoma, IDH-wildtype           | Mesenchymal-like | CL | 315  | 10.5 | 0  | WT        | non-codel | Unmethylated | Gain chr 7 & loss chr 10 | WT     |
| TCGA.32.1970 | 59 | Male   | 3.778450407 | 4.465426006 | Gain    | GBM         | IV  | Glioblastoma, IDH-wildtype           | Mesenchymal-like | CL | 462  | 15.4 | 1  | WT        | non-codel | Unmethylated | Gain chr 7 & loss chr 10 | WT     |
| TCGA.32.1980 | 72 | Male   | 4.916987707 | 6.277871335 | Gain    | GBM         | IV  | Glioblastoma, IDH-wildtype           | LGM6-GBM         | NE | 16   | 1.2  | 1  | WT        | non-codel | Unmethylated | No combined CNA          | WT     |
| TCGA.32.1982 | 76 | Female | 4.377040434 | 7.067568809 | Gain    | GBM         | IV  | Glioblastoma, IDH-wildtype           | Classic-like     | ME | 341  | 4.7  | 1  | WT        | non-codel | Methylated   | Gain chr 7 & loss chr 10 | WT     |
| TCGA.32.2615 | 62 | Male   | 3.96521171  | 6.066763009 | diploid | GBM         | IV  | Glioblastoma, IDH-wildtype           | Mesenchymal-like | ME | 477  | 15.9 | 1  | WT        | non-codel | Unmethylated | No combined CNA          | WT     |
| TCGA.32.2616 | 48 | Female | 4.520019872 | 6.436701549 | Gain    | GBM         | IV  | Glioblastoma, NOS                    | Classic-like     | ME | 222  | 7.4  | 1  | non-codel | non-codel | Methylated   | No combined CNA          | WT     |
| TCGA.32.2632 | 80 | Male   | 5.292219547 | 4.913775035 | Gain    | GBM         | IV  | Glioblastoma, IDH-wildtype           | Mesenchymal-like | ME | 264  | 8.8  | 1  | WT        | non-codel | Unmethylated | No combined CNA          | WT     |
| TCGA.32.2634 | 82 | Male   | 1.970780946 | 6.043066867 | diploid | GBM         | IV  | Glioblastoma, IDH-wildtype           | Classic-like     | CL | 684  | 22.8 | 0  | WT        | non-codel | Methylated   | No combined CNA          | WT     |
| TCGA.32.2638 | 67 | Male   | 3.665108479 | 4.230694987 | Gain    | GBM         | IV  | Glioblastoma, IDH-wildtype           | Classic-like     | CL | 56   | 25.2 | 0  | WT        | non-codel | Methylated   | Gain chr 7 & loss chr 10 | WT     |
| TCGA.32.4213 | 47 | Female | 5.454722066 | 5.309136161 | diploid | GBM         | IV  | Glioblastoma, IDH-wildtype           | Mesenchymal-like | ME | 597  | 19.9 | 0  | WT        | non-codel | Methylated   | No combined CNA          | WT     |
| TCGA.32.5222 | 66 | Male   | 3.865661521 | 4.021177654 | Gain    | GBM         | IV  | Glioblastoma, IDH-wildtype           | Classic-like     | CL | 576  | 19.2 | 1  | WT        | non-codel | Methylated   | Gain chr 7 & loss chr 10 | WT     |
| TCGA.41.2571 | 89 | Male   | 3.222201767 | 9.177107543 | Gain    | GBM         | IV  | Glioblastoma, IDH-wildtype           | Mesenchymal-like | PN | 249  | 13.8 | 1  | WT        | non-codel | Unmethylated | Gain chr 7 & loss chr 10 | WT     |
| TCGA.41.2572 | 67 | Male   | 4.836343284 | 3.728225294 | Gain    | GBM         | IV  | Glioblastoma, IDH-wildtype           | Classic-like     | CL | 39   | 0.3  | 1  | WT        | non-codel | Unmethylated | Gain chr 7 & loss chr 10 | WT     |
| TCGA.41.3915 | 48 | Male   | 4.881933754 | 7.463212096 | Gain    | GBM         | IV  | Glioblastoma, IDH-wildtype           | Mesenchymal-like | ME | 354  | 11.8 | 1  | WT        | non-codel | Methylated   | Gain chr 7 & loss chr 10 | WT     |
| TCGA.41.4097 | 63 | Female | 5.251927341 | 5.089074365 | diploid | GBM         | IV  | Glioblastoma, IDH-wildtype           | Classic-like     | ME | 6    | 0.2  | 1  | WT        | non-codel | Unmethylated | No combined CNA          | WT     |
| TCGA.41.5651 | 59 | Female | 2.25286976  | 6.821000937 | Gain    | GBM         | IV  | Glioblastoma, IDH-wildtype           | Classic-like     | PN | 453  | 15.1 | 1  | WT        | non-codel | Methylated   | Gain chr 7 & loss chr 10 | WT     |
| TCGA.76.4925 | 76 | Male   | 2.382667253 | 6.991386924 | Gain    | GBM         | IV  | Glioblastoma, IDH-wildtype           | Classic-like     | CL | 144  | 4.8  | 1  | WT        | non-codel | Methylated   | Gain chr 7 & loss chr 10 | WT     |
| TCGA.76.4926 | 68 | Male   | 3.239611894 | 6.201039803 | Gain    | GBM         | IV  | Glioblastoma, IDH-wildtype           | Mesenchymal-like | CL | 135  | 4.5  | 1  | WT        | non-codel | Unmethylated | Gain chr 7 & loss chr 10 | WT     |
| TCGA.76.4927 | 58 | Male   | 4.418426104 | 6.755129267 | NA      | GBM         | IV  | Glioblastoma, IDH-wildtype           | Classic-like     | CL | 528  | 17.6 | 1  | WT        | non-codel | Unmethylated | Gain chr 7 & loss chr 10 | WT     |
| TCGA.76.4928 | 85 | Female | 4.206854175 | 4.909019404 | Gain    | GBM         | IV  | Glioblastoma, IDH-wildtype           | Mesenchymal-like | ME | 93   | 3.1  | 1  | WT        | non-codel | Methylated   | Gain chr 7 & loss chr 10 | WT     |
| TCGA.76.4929 | 76 | Female | 4.284203174 | 8.332625594 | Gain    | GBM         | IV  | Glioblastoma, IDH-wildtype           | Classic-like     | CL | 108  | 3.6  | 1  | WT        | non-codel | Methylated   | Gain chr 7 & loss chr 10 | WT     |
| TCGA.76.4931 | 70 | Female | 3.444203691 | 6.154127444 | Gain    | GBM         | IV  | Glioblastoma, IDH-wildtype           | Mesenchymal-like | CL | 276  | 9.2  | 1  | WT        | non-codel | Unmethylated | Gain chr 7 & loss chr 10 | WT     |
| TCGA.76.4932 | 50 | Female | 4.636804402 | 4.365580566 | NA      | GBM         | IV  | Glioblastoma, IDH-wildtype           | Classic-like     | CL | 1437 | 47.9 | 1  | WT        | non-codel | Methylated   | Gain chr 7 & loss chr 10 | WT     |
| TCGA.CS.4938 | 31 | Female | 3.009329255 | 3.700262145 | Gain    | Astrocytoma | II  | Diffuse astrocytoma, IDH-mutant      | G-CIMP-high      | CL | 141  | 4.7  | 0  | Mutant    | non-codel | Unmethylated | No combined CNA          | Mutant |
| TCGA.CS.4941 | 67 | Male   | 4.931716146 | 7.595150045 | Gain    | Astrocytoma | III | Anaplastic astrocytoma, IDH-wildtype | Mesenchymal-like | CL | 231  | 7.7  | 1  | WT        | non-codel | Methylated   | Gain chr 7 & loss chr 10 | WT     |
| TCGA.CS.4942 | 44 | Female | 4.037118612 | 2.619905955 | Gain    | Astrocytoma | III | Anaplastic astrocytoma, IDH-mutant   | G-CIMP-high      |    |      |      |    |           |           |              |                          |        |

|              |    |        |              |             |         |                  |     |                                         |                  |      |      |       |        |           |              |                 |                             |        |
|--------------|----|--------|--------------|-------------|---------|------------------|-----|-----------------------------------------|------------------|------|------|-------|--------|-----------|--------------|-----------------|-----------------------------|--------|
| TCGA.DB.5273 | 33 | Male   | 4.162347015  | 1.517124486 | diploid | Astrocytoma      | III | Anaplastic astrocytoma, IDH-mutant      | G-CIMP-high      | 2460 | 82   | 0     | Mutant | non-codel | Unmethylated | No combined CNA | Mutant                      |        |
| TCGA.DB.5274 | 37 | Female | 3.651797967  | 3.721339846 | diploid | Oligoastrocytoma | III | Anaplastic oligodendrogloma, IDH-mutant | CodeL            | PN   | 2256 | 75.2  | 0      | Mutant    | codeL        | Methylated      | No combined CNA             | WT     |
| TCGA.DB.5275 | 36 | Male   | 1.938285792  | 3.386921282 | diploid | Oligoastrocytoma | III | Anaplastic astrocytoma, IDH-mutant      | G-CIMP-high      | PN   | 1437 | 47.9  | 0      | Mutant    | non-codel    | Methylated      | No combined CNA             | Mutant |
| TCGA.DB.5276 | 32 | Male   | 3.667358536  | 3.899585651 | diploid | Oligoastrocytoma | III | Anaplastic astrocytoma, IDH-mutant      | G-CIMP-high      | NE   | 2187 | 72.9  | 0      | Mutant    | non-codel    | Methylated      | No combined CNA             | Mutant |
| TCGA.DB.5277 | 34 | Male   | 2.527320608  | 4.84029705  | Gain    | Astrocytoma      | III | Anaplastic astrocytoma, IDH-mutant      | G-CIMP-high      | PN   | 1527 | 50.9  | 1      | Mutant    | non-codel    | Methylated      | No combined CNA             | WT     |
| TCGA.DB.5278 | 17 | Male   | 1.966799585  | 5.498193414 | diploid | Oligodendrogloma | II  | Oligodendrogloma, IDH-mutant and 1p/19  | CodeL            | PN   | 2733 | 91.1  | 0      | Mutant    | codeL        | Methylated      | No combined CNA             | WT     |
| TCGA.DB.5279 | 59 | Male   | 2.145807862  | 3.633861281 | diploid | Oligodendrogloma | II  | Oligodendrogloma, IDH-mutant and 1p/19  | CodeL            | NE   | 1735 | 44.5  | 0      | Mutant    | non-codel    | Methylated      | No combined CNA             | WT     |
| TCGA.DB.5280 | 43 | Male   | 2.61223453   | 4.826248477 | diploid | Oligoastrocytoma | II  | Diffuse astrocytoma, IDH-mutant         | G-CIMP-high      | PN   | 1098 | 36.6  | 0      | Mutant    | non-codel    | Methylated      | No combined CNA             | Mutant |
| TCGA.DB.5281 | 61 | Male   | 2.298365055  | 4.546205921 | Gain    | Oligoastrocytoma | III | Anaplastic astrocytoma, IDH-mutant      | G-CIMP-high      | NE   | 2049 | 78.3  | 0      | Mutant    | non-codel    | Methylated      | No combined CNA             | Mutant |
| TCGA.DB.A4X3 | 33 | Female | 1.859298904  | 4.770129736 | Gain    | Oligoastrocytoma | II  | Diffuse astrocytoma, IDH-mutant         | G-CIMP-high      | PN   | 1382 | 46.4  | 0      | Mutant    | non-codel    | Methylated      | No combined CNA             | WT     |
| TCGA.DB.A4XA | 30 | Male   | 3.040980077  | 3.564475727 | diploid | Oligoastrocytoma | II  | Oligodendrogloma, IDH-mutant and 1p/19  | CodeL            | PN   | 564  | 18.8  | 0      | Mutant    | codeL        | Methylated      | No combined CNA             | WT     |
| TCGA.DB.A4XB | 38 | Male   | 2.086715841  | 4.701698752 | Gain    | Astrocytoma      | III | Anaplastic astrocytoma, IDH-mutant      | G-CIMP-high      | PN   | 906  | 30.2  | 0      | Mutant    | non-codel    | Methylated      | No combined CNA             | WT     |
| TCGA.DB.A4XC | 26 | Male   | 3.138664006  | 4.293738322 | diploid | Oligoastrocytoma | II  | Diffuse astrocytoma, IDH-mutant         | G-CIMP-high      | NE   | 1401 | 46.7  | 0      | Mutant    | non-codel    | Methylated      | No combined CNA             | Mutant |
| TCGA.DB.A4XD | 32 | Male   | 2.263665447  | 3.52883383  | Gain    | Astrocytoma      | III | Anaplastic astrocytoma, IDH-mutant      | G-CIMP-high      | PN   | 1194 | 39.7  | 0      | Mutant    | non-codel    | Methylated      | No combined CNA             | Mutant |
| TCGA.DB.A4XE | 27 | Female | 2.206736984  | 4.312483664 | Gain    | Oligoastrocytoma | III | Anaplastic astrocytoma, IDH-mutant      | G-CIMP-high      | PN   | 1125 | 37.5  | 0      | Mutant    | non-codel    | Methylated      | No combined CNA             | Mutant |
| TCGA.DB.A4XF | 41 | Female | 1.93413903   | 3.893653439 | diploid | Astrocytoma      | III | Anaplastic astrocytoma, IDH-mutant      | G-CIMP-high      | PN   | 1008 | 33.6  | 0      | Mutant    | non-codel    | Methylated      | No combined CNA             | WT     |
| TCGA.DB.A4XG | 34 | Male   | 2.562987243  | 3.844566431 | diploid | Oligodendrogloma | II  | Anaplastic oligodendrogloma, IDH-mutant | CodeL            | PN   | 2190 | 73    | 0      | Mutant    | codeL        | Methylated      | No combined CNA             | WT     |
| TCGA.DB.A4XH | 53 | Female | 1.108290261  | 4.177176327 | diploid | Oligoastrocytoma | II  | Oligodendrogloma, IDH-mutant and 1p/19  | CodeL            | NE   | 948  | 31.6  | 0      | Mutant    | codeL        | Methylated      | No combined CNA             | WT     |
| TCGA.DB.A64L | 67 | Female | 3.068516044  | 5.167173243 | diploid | Oligodendrogloma | II  | Oligodendrogloma, IDH-mutant and 1p/19  | CodeL            | NE   | 726  | 24.2  | 0      | Mutant    | codeL        | Methylated      | No combined CNA             | WT     |
| TCGA.DB.A64O | 59 | Male   | 3.144715338  | 6.437442489 | Gain    | Oligoastrocytoma | II  | Diffuse astrocytoma, IDH-wildtype       | Mesenchymal-like | NE   | 765  | 25.5  | 1      | WT        | non-codel    | Unmethylated    | Gain chr 7 amp; loss chr 10 | WT     |
| TCGA.DB.A64P | 40 | Male   | 2.101347522  | 1.750349241 | diploid | Oligodendrogloma | III | Anaplastic oligodendrogloma, IDH-mutant | CodeL            | PN   | 903  | 30.1  | 0      | Mutant    | codeL        | Methylated      | No combined CNA             | WT     |
| TCGA.DB.A64Q | 31 | Female | 2.202417722  | 3.659365177 | diploid | Oligoastrocytoma | II  | Oligodendrogloma, IDH-mutant and 1p/19  | CodeL            | PN   | 180  | 6     | 0      | Mutant    | codeL        | Methylated      | No combined CNA             | WT     |
| TCGA.DB.A64R | 24 | Female | 1.285698126  | 4.597602681 | diploid | Oligodendrogloma | II  | Oligodendrogloma, IDH-mutant and 1p/19  | CodeL            | PN   | 942  | 31.4  | 0      | Mutant    | codeL        | Methylated      | No combined CNA             | WT     |
| TCGA.DB.A64S | 20 | Female | 2.392061537  | 3.553229739 | diploid | Oligoastrocytoma | II  | Diffuse astrocytoma, IDH-mutant         | G-CIMP-high      | PN   | 834  | 27.4  | 0      | Mutant    | non-codel    | Methylated      | No combined CNA             | Mutant |
| TCGA.DB.A64U | 38 | Female | 2.647471013  | 3.523223197 | diploid | Oligoastrocytoma | II  | Oligodendrogloma, IDH-mutant and 1p/19  | CodeL            | PN   | 824  | 27.8  | 0      | Mutant    | codeL        | Methylated      | No combined CNA             | WT     |
| TCGA.DB.A64V | 54 | Male   | 4.62479107   | 3.720453592 | diploid | Oligodendrogloma | II  | Oligodendrogloma, IDH-mutant and 1p/19  | CodeL            | PN   | 876  | 29.2  | 0      | Mutant    | codeL        | Methylated      | No combined CNA             | WT     |
| TCGA.DB.A64W | 65 | Female | -0.083141235 | 4.991807522 | diploid | Oligoastrocytoma | II  | Anaplastic oligodendrogloma, IDH-mutant | CodeL            | PN   | 432  | 14.4  | 1      | Mutant    | codeL        | Methylated      | No combined CNA             | WT     |
| TCGA.DB.A64X | 56 | Female | 3.099227866  | 4.177256073 | Gain    | Astrocytoma      | III | Anaplastic astrocytoma, IDH-mutant      | G-CIMP-high      | NE   | 555  | 18.5  | 0      | Mutant    | non-codel    | Methylated      | No combined CNA             | WT     |
| TCGA.DB.A75K | 55 | Female | 4.414108465  | 4.251946271 | diploid | Oligoastrocytoma | II  | Anaplastic oligodendrogloma, IDH-mutant | CodeL            | PN   | 363  | 12.1  | 0      | Mutant    | codeL        | Methylated      | No combined CNA             | WT     |
| TCGA.DB.A75L | 36 | Female | 2.032347738  | 4.647095728 | diploid | Astrocytoma      | III | Anaplastic astrocytoma, IDH-mutant      | G-CIMP-high      | NE   | 536  | 11.2  | 0      | Mutant    | non-codel    | Methylated      | No combined CNA             | WT     |
| TCGA.DB.A75M | 47 | Male   | 2.171623176  | 3.497816717 | diploid | Astrocytoma      | II  | Diffuse astrocytoma, IDH-mutant         | G-CIMP-high      | PN   | 337  | 17.9  | 0      | Mutant    | non-codel    | Methylated      | No combined CNA             | Mutant |
| TCGA.DB.A75O | 29 | Male   | 4.810751559  | 3.958285901 | Gain    | Astrocytoma      | III | Anaplastic astrocytoma, IDH-mutant      | G-CIMP-high      | PN   | 921  | 30.7  | 0      | Mutant    | non-codel    | Methylated      | No combined CNA             | WT     |
| TCGA.DB.A75P | 25 | Female | 3.751570837  | 5.983233054 | diploid | Astrocytoma      | II  | Diffuse astrocytoma, IDH-wildtype       | PA-like          | NE   | 486  | 16.2  | 0      | WT        | non-codel    | Unmethylated    | No combined CNA             | WT     |
| TCGA.DH.5140 | 38 | Female | 3.157868334  | 6.179379673 | diploid | Oligoastrocytoma | III | Anaplastic astrocytoma, IDH-wildtype    | PA-like          | PN   | 20   | 2.0   | 1      | WT        | non-codel    | Unmethylated    | No combined CNA             | WT     |
| TCGA.DH.5141 | 32 | Male   | 2.861975209  | 1.767061498 | diploid | Oligodendrogloma | III | Anaplastic oligodendrogloma, IDH-mutant | CodeL            | PN   | 904  | 31.8  | 0      | Mutant    | codeL        | Methylated      | No combined CNA             | WT     |
| TCGA.DH.5142 | 29 | Male   | 4.246400486  | 2.382445921 | diploid | Astrocytoma      | III | Anaplastic astrocytoma, IDH-mutant      | G-CIMP-high      | PN   | 1917 | 63.9  | 0      | Mutant    | non-codel    | Methylated      | No combined CNA             | Mutant |
| TCGA.DH.5143 | 30 | Male   | 3.455340949  | 3.331676527 | diploid | Oligoastrocytoma | III | Anaplastic astrocytoma, IDH-mutant      | G-CIMP-high      | NE   | 1383 | 46.1  | 0      | Mutant    | non-codel    | Methylated      | No combined CNA             | WT     |
| TCGA.DH.5144 | 56 | Female | 1.99474529   | 2.19862879  | Gain    | Oligodendrogloma | III | Anaplastic oligodendrogloma, IDH-mutant | CodeL            | PN   | 240  | 8.0   | 0      | Mutant    | codeL        | Methylated      | No combined CNA             | Mutant |
| TCGA.DH.A669 | 70 | Male   | 3.684448461  | 3.531493752 | Gain    | Oligodendrogloma | III | Anaplastic oligodendrogloma, IDH-mutant | CodeL            | PN   | 906  | 30.2  | 0      | Mutant    | codeL        | Methylated      | No combined CNA             | WT     |
| TCGA.DH.A66B | 52 | Male   | 3.07563531   | 1.86844972  | NA      | Astrocytoma      | III | Anaplastic astrocytoma, IDH-mutant      | G-CIMP-high      | PN   | 1260 | 42    | 0      | Mutant    | non-codel    | Methylated      | No combined CNA             | WT     |
| TCGA.DH.A66D | 43 | Female | 3.885056932  | 4.115091522 | Gain    | Astrocytoma      | III | Anaplastic astrocytoma, IDH-mutant      | G-CIMP-high      | PN   | 834  | 27.8  | 0      | Mutant    | non-codel    | Methylated      | No combined CNA             | Mutant |
| TCGA.DH.A66F | 49 | Male   | 2.627396722  | 2.643879273 | diploid | Oligodendrogloma | II  | Oligodendrogloma, IDH-mutant and 1p/19  | CodeL            | PN   | 516  | 17.2  | 0      | Mutant    | codeL        | Methylated      | No combined CNA             | WT     |
| TCGA.DH.A66G | 49 | Female | 2.812559834  | 4.778207709 | Gain    | Oligodendrogloma | III | Anaplastic astrocytoma, IDH-mutant      | G-CIMP-high      | PN   | 516  | 17.2  | 0      | Mutant    | non-codel    | Methylated      | No combined CNA             | Mutant |
| TCGA.DH.A7U  | 59 | Female | 1.708906234  | 5.623612308 | diploid | Oligodendrogloma | II  | Anaplastic oligodendrogloma, IDH-mutant | CodeL            | PN   | 1626 | 54.2  | 0      | Mutant    | codeL        | Methylated      | No combined CNA             | Mutant |
| TCGA.DH.A7US | 50 | Male   | 2.417542007  | 3.886130642 | diploid | Oligodendrogloma | II  | Oligodendrogloma, IDH-mutant and 1p/19  | CodeL            | PN   | 626  | 23.2  | 0      | Mutant    | codeL        | Methylated      | No combined CNA             | WT     |
| TCGA.DH.A7UT | 30 | Male   | 3.658976908  | 5.726700453 | Gain    | Astrocytoma      | III | Anaplastic astrocytoma, IDH-mutant      | G-CIMP-high      | PN   | 595  | 17.5  | 1      | Mutant    | non-codel    | Methylated      | No combined CNA             | WT     |
| TCGA.DH.A7UV | 43 | Male   | 2.620516033  | 3.44796263  | diploid | Astrocytoma      | III | Anaplastic astrocytoma, IDH-mutant      | G-CIMP-high      | PN   | 411  | 13.7  | 0      | Mutant    | non-codel    | Methylated      | No combined CNA             | WT     |
| TCGA.DH.A7UU | 49 | Male   | 2.952501312  | 3.870966334 | Gain    | Astrocytoma      | III | Anaplastic astrocytoma, IDH-mutant      | G-CIMP-high      | PN   | 558  | 18.6  | 0      | Mutant    | non-codel    | Methylated      | No combined CNA             | Mutant |
| TCGA.DU.5847 | 34 | Female | 4.2982624    | 6.069566843 | diploid | Astrocytoma      | III | Anaplastic astrocytoma, IDH-wildtype    | Mesenchymal-like | ME   | 540  | 14.6  | 0      | WT        | non-codel    | Methylated      | No combined CNA             | WT     |
| TCGA.DU.5849 | 48 | Male   | 1.394898224  | 4.928322419 | Gain    | Oligodendrogloma | II  | Oligodendrogloma, IDH-mutant and 1p/19  | CodeL            | NE   | 438  | 18    | 0      | Mutant    | codeL        | Methylated      | No combined CNA             | WT     |
| TCGA.DU.5951 | 40 | Female | 2.2314918    | 5.125411404 | diploid | Oligoastrocytoma | III | Anaplastic astrocytoma, IDH-mutant      | G-CIMP-high      | PN   | 525  | 17.5  | 0      | Mutant    | non-codel    | Unmethylated    | No combined CNA             | Mutant |
| TCGA.DU.5952 | 61 | Female | 5.095755674  | 5.246225649 | diploid | Oligoastrocytoma | III | Anaplastic astrocytoma, IDH-wildtype    | Mesenchymal-like | CL   | 1974 | 6.7   | 0      | Mutant    | non-codel    | Methylated      | No combined CNA             | Mutant |
| TCGA.DU.5853 | 29 | Male   | 3.102154192  | 3.340747401 | diploid | Oligoastrocytoma | II  | Diffuse astrocytoma, IDH-mutant         | G-CIMP-high      | PN   | 402  | 13.4  | 0      | Mutant    | non-codel    | Methylated      | No combined CNA             | Mutant |
| TCGA.DU.5854 | 57 | Female | 4.393601537  | 4.351790849 | Gain    | Astrocytoma      | III | Anaplastic astrocytoma, IDH-wildtype    | Mesenchymal-like | CL   | 252  | 8.4   | 0      | WT        | non-codel    | Unmethylated    | Gain chr 7 amp; loss chr 10 | WT     |
| TCGA.DU.5855 | 49 | Female | 4.008854364  | 3.788309851 | Gain    | Oligoastrocytoma | III | Anaplastic astrocytoma, IDH-mutant      | G-CIMP-high      | PN   | 204  | 6.8   | 0      | Mutant    | non-codel    | Methylated      | No combined CNA             | Mutant |
| TCGA.DU.5870 | 34 | Female | 1.914908892  | 2.285638949 | diploid | Oligodendrogloma | II  | Oligodendrogloma, IDH-mutant and 1p/19  | CodeL            | PN   | 5469 | 182.3 | 0      | Mutant    | codeL        | Methylated      | No combined CNA             | WT     |
| TCGA.DU.5871 | 37 | Female | 1.69692859   | 3.727117912 | diploid | Oligoastrocytoma | II  | Diffuse astrocytoma, IDH-mutant         | G-CIMP-high      | PN   | 567  | 18.9  | 0      | Mutant    | non-codel    | Methylated      | No combined CNA             | Mutant |
| TCGA.DU.5872 | 43 | Female | 3.023894043  | 4.134878054 | diploid | Oligoastrocytoma | II  | Diffuse astrocytoma, IDH-mutant         | G-CIMP-high      | PN   | 525  | 17.5  | 0      | Mutant    | non-codel    | Methylated      | No combined CNA             | Mutant |
| TCGA.DU.5874 | 62 | Female | 0.96761131   | 2.853556586 | diploid | Oligodendrogloma | II  | Oligodendrogloma, IDH-mutant and 1p/19  | CodeL            | PN   | 456  | 15.2  | 0      | Mutant    | codeL        | Methylated      | No combined CNA             | WT     |
| TCGA.DU.6392 | 35 | Female | 2.983768886  | 6.226701185 | Gain    | Astrocytoma      | III | Anaplastic astrocytoma, IDH-wildtype    | PA-like          | PN   | 6336 | 211.2 | 0      | WT        | non-codel    | Unmethylated    | No combined CNA             | Mutant |
| TCGA.DU.6393 | 66 | Male   | 1.740711733  | 2.89373109  | diploid | Oligodendrogloma | III | Anaplastic oligodendrogloma, IDH-mutant | CodeL            | PN   | 1563 | 52.1  | 1      | Mutant    | codeL        | Methylated      | No combined CNA             | WT     |
| TCGA.DU.6394 | 53 | Male   | 1.386424705  | 2.427284346 | diploid | Oligodendrogloma | III | Anaplastic oligodendrogloma, IDH-mutant | CodeL            | PN   | 672  | 22.4  | 1      | Mutant    | codeL        | Methylated      | No combined CNA             | WT     |
| TCGA.DU.6395 | 31 | Male   | 1.720803782  | 3.743514968 | Gain    | Oligoastrocytoma | II  | Diffuse astrocytoma, IDH-mutant         | G-CIMP-high      | PN   | 1470 | 49    | 1      | Mutant    | non-codel    | Methylated      | No combined CNA             | Mutant |
| TCGA.DU.6396 | 31 | Female | 4.78466251   | 1.40506656  | diploid | Oligoastrocytoma | III | Anaplastic astrocytoma, IDH-mutant      | G-CIMP-high      | PN   | 2356 | 75.2  | 1      | Mutant    | non-codel    | Methylated      | No combined CNA             | Mutant |
| TCGA.DU.6397 | 45 | Male   | 2.43151599   | 1.750992249 | diploid | Oligodendrogloma | III | Anaplastic oligodendrogloma, IDH-mutant | CodeL            | PN   | 1283 | 46.1  | 1      | Mutant    | codeL        | Methylated      | No combined CNA             | WT     |
| TCGA.DU.6399 | 54 | Male   | 4.8562439    | 2.546819298 | Gain    | Oligoastrocytoma | II  | Oligodendrogloma, NOS                   | G-CIMP-high      | PN   | 1974 | 6.7   | 0      | Mutant    | non-codel    | Methylated      | No combined CNA             | Mutant |
| TCGA.DU.6400 | 66 | Female | 2.203921541  | 3.437134504 | Gain    | Oligodendrogloma | II  | Oligodendrogloma, IDH-mutant and 1p/19  | CodeL            | PN   | 36   | 1.2   | 1      | Mutant    | codeL        | Methylated      | No combined CNA             | WT     |
| TCGA.DU.6401 | 31 | Female | 1.068258062  | 3.058901354 | diploid | Oligodendrogloma | II  | Oligodendrogloma, NOS                   | G-CIMP-high      | PN   | 2625 | 87.5  | 1      | Mutant    | non-codel    | Methylated      | No combined CNA             | Mutant |
| TCGA.DU.6402 | 52 | Male   | 4.155619721  | 2.957728912 | Gain    | Astrocytoma      | III | Anaplastic astrocytoma, IDH-wildtype    | Classic-like     | CL   | 210  | 7     | 1      | WT        | non-codel    | Unmethylated    | Gain chr 7 amp; loss chr 10 | WT     |
| TCGA.DU.6403 | 60 | Female | 4.834574705  | 5.458418097 | Gain    | Oligoastrocytoma | III | Anaplastic astrocytoma, IDH-wildtype    | Classic-like     | PN   | 348  | 11.6  | 1      | WT        | non-codel    | Unmethylated    | Gain chr 7 amp; loss chr 10 | WT     |
| TCGA.DU.6404 | 24 | Female | 4.867387478  | 5.654266537 |         |                  |     |                                         |                  |      |      |       |        |           |              |                 |                             |        |



|              |    |        |             |             |         |                   |     |                                          |                  |    |      |       |   |        |           |              |                             |        |
|--------------|----|--------|-------------|-------------|---------|-------------------|-----|------------------------------------------|------------------|----|------|-------|---|--------|-----------|--------------|-----------------------------|--------|
| TCGA.DU.7019 | 39 | Male   | 1.500547137 | 3.26477661  | diploid | Oligoastrocytoma  | III | Anaplastic astrocytoma, IDH-mutant       | G-CIMP-high      |    | 789  | 26.3  | 0 | Mutant | non-codel | Methylated   | No combined CNA             | WT     |
| TCGA.DU.7290 | 45 | Female | 3.348616558 | 8.945797882 | diploid | Astrocytoma       | III | Anaplastic astrocytoma, IDH-wildtype     | Mesenchymal-like | ME | 312  | 10.4  | 1 | WT     | non-codel | Unmethylated | No combined CNA             | WT     |
| TCGA.DU.7292 | 69 | Male   | 2.488052203 | 5.429180747 | Gain    | Astrocytoma       | III | Anaplastic astrocytoma, IDH-wildtype     | Classic-like     | NE | 240  | 8.8   | 1 | WT     | non-codel | Methylated   | No combined CNA             | WT     |
| TCGA.DU.7294 | 53 | Female | 0.590434352 | 2.724933981 | diploid | Oligodendroglioma | II  | Oligodendroglioma, IDH-mutant and 1p/19  | Codel            | PN | 2829 | 94.3  | 0 | Mutant | codel     | Methylated   | No combined CNA             | WT     |
| TCGA.DU.7298 | 38 | Female | 2.523110259 | 3.536413529 | diploid | Astrocytoma       | III | Anaplastic astrocytoma, IDH-mutant       | G-CIMP-high      | PN | 567  | 18.9  | 1 | Mutant | non-codel | Methylated   | No combined CNA             | Mutant |
| TCGA.DU.7299 | 33 | Male   | 1.892546459 | 2.551589842 | diploid | Astrocytoma       | III | Anaplastic astrocytoma, IDH-mutant       | G-CIMP-high      | PN | 1320 | 44    | 1 | Mutant | non-codel | Methylated   | No combined CNA             | WT     |
| TCGA.DU.7300 | 53 | Female | 2.69081934  | 4.367182329 | diploid | Oligodendroglioma | III | Anaplastic oligodendroglioma, IDH-mutant | Codel            | NE | 1860 | 62    | 1 | Mutant | codel     | Methylated   | No combined CNA             | WT     |
| TCGA.DU.7301 | 53 | Male   | 2.895225055 | 2.157852169 | Gain    | Oligodendroglioma | II  | Oligodendroglioma, NOS                   | G-CIMP-high      | PN | 777  | 25.9  | 1 | Mutant | non-codel | Methylated   | No combined CNA             | Mutant |
| TCGA.DU.7302 | 48 | Female | 1.690059451 | 4.141089407 | diploid | Oligodendroglioma | III | Anaplastic oligodendroglioma, IDH-mutant | Codel            | NE | 1809 | 60.3  | 0 | Mutant | codel     | Methylated   | No combined CNA             | WT     |
| TCGA.DU.7304 | 43 | Male   | 3.842861388 | 4.496814113 | diploid | Oligodendroglioma | III | Anaplastic astrocytoma, IDH-mutant       | G-CIMP-high      | NE | 689  | 23.3  | 1 | Mutant | non-codel | Methylated   | No combined CNA             | WT     |
| TCGA.DU.7306 | 67 | Male   | 1.876094513 | 0.574634396 | Gain    | Oligoastrocytoma  | II  | Diffuse astrocytoma, IDH-mutant          | G-CIMP-high      | NE | 1260 | 42    | 0 | Mutant | non-codel | Methylated   | No combined CNA             | Mutant |
| TCGA.DU.7309 | 41 | Female | 2.23526753  | 5.12164955  | Gain    | Oligodendroglioma | II  | Anaplastic oligodendroglioma, NOS        | G-CIMP-high      | NE | 84   | 2.8   | 0 | Mutant | non-codel | Methylated   | No combined CNA             | Mutant |
| TCGA.DU.8158 | 57 | Female | 3.768171089 | 8.871678577 | diploid | Astrocytoma       | III | Anaplastic astrocytoma, IDH-wildtype     | Mesenchymal-like | CL | 153  | 5.1   | 1 | WT     | non-codel | Unmethylated | No combined CNA             | WT     |
| TCGA.DU.8161 | 63 | Female | 4.245077275 | 5.549050919 | Gain    | Oligoastrocytoma  | III | Anaplastic astrocytoma, IDH-wildtype     | Mesenchymal-like | CL | 711  | 23.7  | 1 | WT     | non-codel | Unmethylated | Gain chr 7 amp; loss chr 10 | WT     |
| TCGA.DU.8162 | 61 | Female | 3.161355641 | 5.372457653 | diploid | Oligoastrocytoma  | III | Anaplastic astrocytoma, IDH-wildtype     | Mesenchymal-like | NE | 438  | 14.6  | 1 | WT     | non-codel | Unmethylated | No combined CNA             | WT     |
| TCGA.DU.8163 | 29 | Male   | 3.414338525 | 4.646277884 | Gain    | Oligoastrocytoma  | III | Anaplastic astrocytoma, IDH-mutant       | G-CIMP-high      | PN | 621  | 20.7  | 0 | Mutant | non-codel | Unmethylated | No combined CNA             | Mutant |
| TCGA.DU.8164 | 51 | Male   | 1.44948214  | 3.640019294 | diploid | Oligodendroglioma | II  | Oligodendroglioma, IDH-mutant and 1p/19  | Codel            | PN | 642  | 21.4  | 0 | Mutant | codel     | Methylated   | No combined CNA             | WT     |
| TCGA.DU.8165 | 60 | Female | 4.023769875 | 7.308788688 | Gain    | Oligodendroglioma | III | Anaplastic oligodendroglioma, NOS        | Mesenchymal-like | ME | 573  | 19.1  | 0 | WT     | non-codel | Unmethylated | Gain chr 7 amp; loss chr 10 | WT     |
| TCGA.DU.8166 | 29 | Female | 1.444136957 | 4.176386607 | Gain    | Oligoastrocytoma  | II  | Diffuse astrocytoma, IDH-mutant          | G-CIMP-high      | PN | 510  | 17    | 0 | Mutant | non-codel | Methylated   | No combined CNA             | Mutant |
| TCGA.DU.8167 | 69 | Female | 3.210170636 | 3.998475348 | diploid | Oligoastrocytoma  | II  | Diffuse astrocytoma, IDH-mutant          | G-CIMP-high      | PN | 465  | 15.5  | 0 | Mutant | non-codel | Methylated   | No combined CNA             | WT     |
| TCGA.DU.8168 | 55 | Female | 2.165558254 | 3.090006653 | diploid | Oligodendroglioma | III | Anaplastic oligodendroglioma, IDH-mutant | Codel            | PN | 426  | 14.2  | 0 | Mutant | codel     | Methylated   | No combined CNA             | WT     |
| TCGA.DU.8169 | 33 | Male   | 3.63282657  | 3.347095138 | diploid | Astrocytoma       | III | Anaplastic astrocytoma, IDH-mutant       | G-CIMP-high      | ME | 999  | 33.3  | 0 | Mutant | non-codel | Methylated   | No combined CNA             | Mutant |
| TCGA.DU.8170 | 51 | Male   | 5.252574114 | 4.778213834 | Gain    | Oligoastrocytoma  | II  | Diffuse astrocytoma, IDH-mutant          | G-CIMP-high      | ME | 897  | 29.7  | 0 | Mutant | non-codel | Methylated   | No combined CNA             | Mutant |
| TCGA.DU.8171 | 42 | Male   | 3.751751281 | 4.015399441 | Gain    | Oligodendroglioma | III | Oligodendroglioma, NOS                   | G-CIMP-high      | PN | 951  | 31.9  | 0 | Mutant | non-codel | Methylated   | No combined CNA             | WT     |
| TCGA.DU.8172 | 70 | Male   | 3.191973167 | 8.073360751 | diploid | Oligodendroglioma | III | Anaplastic oligodendroglioma, NOS        | Mesenchymal-like | NE | 732  | 24.4  | 0 | WT     | non-codel | Methylated   | No combined CNA             | WT     |
| TCGA.DU.8173 | 62 | Female | 5.2217943   | 4.126807703 | Gain    | Astrocytoma       | II  | Diffuse astrocytoma, IDH-mutant          | G-CIMP-high      | PN | 786  | 26.2  | 0 | Mutant | non-codel | Methylated   | No combined CNA             | Mutant |
| TCGA.DU.8174 | 33 | Female | 1.84631278  | 4.988093856 | Gain    | Astrocytoma       | III | Anaplastic astrocytoma, IDH-mutant       | G-CIMP-high      | PN | 750  | 25    | 0 | Mutant | non-codel | Methylated   | No combined CNA             | Mutant |
| TCGA.DU.8175 | 46 | Female | 5.396313644 | 4.900746075 | Gain    | Astrocytoma       | III | Anaplastic astrocytoma, IDH-wildtype     | Mesenchymal-like | CL | 1020 | 34    | 1 | WT     | non-codel | Methylated   | Gain chr 7 amp; loss chr 10 | WT     |
| TCGA.DU.8176 | 37 | Female | 1.189603197 | 5.387889806 | diploid | Oligodendroglioma | II  | Oligodendroglioma, IDH-mutant and 1p/19  | Codel            | NE | 768  | 25.6  | 0 | Mutant | codel     | Methylated   | No combined CNA             | WT     |
| TCGA.DU.8177 | 60 | Male   | 1.586164246 | 4.91334901  | diploid | Oligodendroglioma | II  | Oligodendroglioma, IDH-mutant and 1p/19  | Codel            | PN | 648  | 21.6  | 0 | Mutant | codel     | Methylated   | No combined CNA             | WT     |
| TCGA.DU.8178 | 35 | Female | 2.749126609 | 5.620806317 | Gain    | Oligoastrocytoma  | II  | Oligoastrocytoma, IDH-mutant and 1p/19   | Codel            | NE | 2853 | 95.1  | 0 | Mutant | codel     | Methylated   | No combined CNA             | WT     |
| TCGA.DU.8179 | 27 | Female | 3.90446483  | 3.368181655 | diploid | Astrocytoma       | III | Anaplastic astrocytoma, IDH-mutant       | G-CIMP-high      | PN | 630  | 21    | 0 | Mutant | non-codel | Methylated   | No combined CNA             | Mutant |
| TCGA.DU.8180 | 74 | Female | 1.646899949 | 3.249307079 | diploid | Oligodendroglioma | II  | Anaplastic oligodendroglioma, IDH-mutant | Codel            | PN | 669  | 22.3  | 0 | Mutant | codel     | Methylated   | No combined CNA             | WT     |
| TCGA.DU.8181 | 87 | Male   | 1.900490089 | 4.973790339 | Gain    | Oligodendroglioma | II  | Oligodendroglioma, NOS                   | Classic-like     | NE | 342  | 11.4  | 1 | WT     | non-codel | Unmethylated | Gain chr 7 amp; loss chr 10 | WT     |
| TCGA.DU.8182 | 54 | Male   | 3.655683839 | 6.998635557 | Gain    | Oligodendroglioma | III | Anaplastic oligodendroglioma, NOS        | Mesenchymal-like | ME | 804  | 26.8  | 1 | WT     | non-codel | Methylated   | Gain chr 7 amp; loss chr 10 | WT     |
| TCGA.DU.8183 | 30 | Male   | 4.309634598 | 3.668970055 | Gain    | Astrocytoma       | II  | Diffuse astrocytoma, IDH-mutant          | G-CIMP-high      | PN | 616  | 17.2  | 0 | Mutant | non-codel | Methylated   | No combined CNA             | Mutant |
| TCGA.DU.8184 | 51 | Male   | 2.146915848 | 4.015399441 | Gain    | Oligodendroglioma | III | Anaplastic oligodendroglioma, IDH-mutant | Codel            | NE | 539  | 21.3  | 1 | Mutant | codel     | Methylated   | No combined CNA             | WT     |
| TCGA.DU.8185 | 73 | Female | 1.352897454 | 5.398295639 | diploid | Oligodendroglioma | III | Anaplastic oligodendroglioma, IDH-mutant | Codel            | PN | 540  | 18    | 1 | Mutant | non-codel | Methylated   | No combined CNA             | WT     |
| TCGA.DU.8186 | 55 | Male   | 1.010761939 | 4.245191393 | Gain    | Oligoastrocytoma  | III | Anaplastic astrocytoma, IDH-mutant       | G-CIMP-high      | PN | 4170 | 139   | 0 | Mutant | non-codel | Methylated   | No combined CNA             | Mutant |
| TCGA.DU.8187 | 32 | Male   | 3.682348561 | 4.720608811 | Gain    | Oligodendroglioma | II  | Oligodendroglioma, NOS                   | G-CIMP-high      | PN | 2529 | 84.3  | 0 | Mutant | non-codel | Methylated   | No combined CNA             | Mutant |
| TCGA.DU.8188 | 56 | Male   | 3.197503729 | 6.116441697 | diploid | Oligodendroglioma | II  | Oligodendroglioma, NOS                   | PA-like          | PN | 1545 | 51.5  | 0 | WT     | non-codel | Unmethylated | No combined CNA             | WT     |
| TCGA.DU.8189 | 32 | Male   | 3.41362116  | 5.553750617 | diploid | Astrocytoma       | II  | Diffuse astrocytoma, IDH-mutant          | G-CIMP-high      | NE | 1122 | 37.4  | 0 | Mutant | non-codel | Methylated   | No combined CNA             | WT     |
| TCGA.DU.8190 | 52 | Male   | 5.377547192 | 3.84796685  | Gain    | Oligoastrocytoma  | III | Anaplastic astrocytoma, IDH-wildtype     | Mesenchymal-like | CL | 225  | 7.5   | 1 | WT     | non-codel | Unmethylated | Gain chr 7 amp; loss chr 10 | WT     |
| TCGA.DU.8191 | 40 | Male   | 2.434534825 | 6.174188671 | diploid | Oligodendroglioma | II  | Oligodendroglioma, NOS                   | G-CIMP-high      | NE | 1332 | 44.4  | 1 | Mutant | non-codel | Methylated   | No combined CNA             | WT     |
| TCGA.DU.8192 | 32 | Male   | 3.339222918 | 4.54799265  | Gain    | Astrocytoma       | III | Anaplastic astrocytoma, NOS              | Classic-like     | NE | 1167 | 38.9  | 1 | WT     | non-codel | Methylated   | No combined CNA             | WT     |
| TCGA.DU.8193 | 55 | Male   | 4.065141438 | 2.70015115  | Gain    | Astrocytoma       | III | Anaplastic astrocytoma, IDH-wildtype     | Mesenchymal-like | CL | 18   | 0.6   | 0 | WT     | non-codel | Methylated   | Gain chr 7 amp; loss chr 10 | WT     |
| TCGA.E1.5302 | 41 | Male   | 4.208111425 | 2.508834274 | Gain    | Astrocytoma       | III | Anaplastic astrocytoma, IDH-mutant       | G-CIMP-high      | PN | 1503 | 50.1  | 1 | Mutant | non-codel | Methylated   | No combined CNA             | Mutant |
| TCGA.E1.5303 | 38 | Male   | 4.505789328 | 3.045635177 | diploid | Astrocytoma       | III | Anaplastic astrocytoma, IDH-mutant       | G-CIMP-high      | PN | 2025 | 67.5  | 1 | Mutant | non-codel | Methylated   | No combined CNA             | Mutant |
| TCGA.E1.5304 | 42 | Male   | 1.384823459 | 2.889707158 | Gain    | Astrocytoma       | III | Anaplastic astrocytoma, IDH-mutant       | G-CIMP-low       | NE | 1233 | 41    | 1 | Mutant | non-codel | Unmethylated | No combined CNA             | Mutant |
| TCGA.E1.5305 | 34 | Male   | 1.82321946  | 3.027366405 | diploid | Astrocytoma       | III | Anaplastic astrocytoma, IDH-mutant       | G-CIMP-high      | PN | 2400 | 80.1  | 1 | Mutant | non-codel | Methylated   | No combined CNA             | Mutant |
| TCGA.E1.5307 | 62 | Female | 2.401930769 | 3.40603319  | diploid | Astrocytoma       | III | Anaplastic astrocytoma, IDH-mutant       | G-CIMP-high      | PN | 1737 | 57.9  | 1 | Mutant | non-codel | Methylated   | No combined CNA             | Mutant |
| TCGA.E1.5311 | 31 | Male   | 2.072140109 | 4.137946101 | diploid | Oligodendroglioma | III | Anaplastic oligodendroglioma, IDH-mutant | Codel            | PN | 429  | 134.3 | 1 | Mutant | codel     | Methylated   | No combined CNA             | WT     |
| TCGA.E1.5318 | 42 | Female | 1.81077212  | 3.397296424 | diploid | Oligodendroglioma | II  | Oligodendroglioma, IDH-mutant and 1p/19  | Codel            | PN | 2426 | 78.2  | 1 | Mutant | codel     | Methylated   | No combined CNA             | WT     |
| TCGA.E1.5319 | 48 | Female | 1.892546459 | 1.946131952 | diploid | Oligodendroglioma | II  | Oligodendroglioma, IDH-mutant and 1p/19  | Codel            | PN | 2868 | 95.6  | 1 | Mutant | codel     | Methylated   | No combined CNA             | WT     |
| TCGA.E1.5322 | 38 | Female | 2.18551772  | 2.359830367 | Gain    | Oligoastrocytoma  | II  | Diffuse astrocytoma, IDH-mutant          | G-CIMP-high      | PN | 3924 | 130.8 | 1 | Mutant | non-codel | Methylated   | No combined CNA             | Mutant |
| TCGA.E1.1A7D | 57 | Male   | 3.606454073 | 6.531156851 | Gain    | Astrocytoma       | III | Anaplastic astrocytoma, IDH-wildtype     | Mesenchymal-like | CL | 429  | 14.3  | 1 | WT     | non-codel | Unmethylated | Gain chr 7 amp; loss chr 10 | WT     |
| TCGA.E1.1A7E | 32 | Female | 3.098436402 | 3.351472858 | diploid | Astrocytoma       | III | Anaplastic astrocytoma, IDH-mutant       | G-CIMP-low       | ME | 873  | 29.1  | 1 | Mutant | non-codel | Unmethylated | No combined CNA             | Mutant |
| TCGA.E1.1A7H | 47 | Female | 3.670305845 | 4.253437186 | diploid | Astrocytoma       | III | Anaplastic astrocytoma, IDH-mutant       | G-CIMP-high      | PN | 2796 | 93.2  | 1 | Mutant | non-codel | Methylated   | No combined CNA             | Mutant |
| TCGA.E1.1A7Y | 33 | Female | 3.019399468 | 2.899175653 | diploid | Astrocytoma       | III | Anaplastic astrocytoma, IDH-mutant       | G-CIMP-low       | PN | 1086 | 3.6   | 1 | Mutant | non-codel | Methylated   | No combined CNA             | Mutant |
| TCGA.E1.1A7Z | 55 | Male   | 5.361501689 | 3.608974788 | diploid | Astrocytoma       | III | Anaplastic astrocytoma, IDH-wildtype     | Classic-like     | CL | 585  | 19.5  | 1 | WT     | non-codel | Unmethylated | Gain chr 7 amp; loss chr 10 | WT     |
| TCGA.E1.1A7K | 52 | Male   | 5.071192033 | 3.853067474 | diploid | Astrocytoma       | III | Anaplastic astrocytoma, IDH-mutant       | G-CIMP-high      | ME | 486  | 12.4  | 1 | WT     | non-codel | Unmethylated | No combined CNA             | Mutant |
| TCGA.E1.1A7L | 46 | Male   | 5.377092507 | 6.782326224 | Gain    | Astrocytoma       | III | Anaplastic astrocytoma, IDH-wildtype     | Mesenchymal-like | ME | 486  | 12.4  | 1 | WT     | non-codel | Unmethylated | Gain chr 7 amp; loss chr 10 | WT     |
| TCGA.E1.1A7M | 63 | Male   | 3.73433027  | 4.847155089 | Gain    | Astrocytoma       | III | Anaplastic astrocytoma, IDH-wildtype     | Mesenchymal-like | NE | 639  | 21.3  | 1 | WT     | non-codel | Unmethylated | Gain chr 7 amp; loss chr 10 | WT     |
| TCGA.E1.1A7N | 63 | Female | 6.448915814 | 4.551989661 | Gain    | Astrocytoma       | III | Anaplastic astrocytoma, IDH-wildtype     | Mesenchymal-like | ME | 717  | 23.9  | 1 | WT     | non-codel | Methylated   | Gain chr 7 amp; loss chr 10 | WT     |
| TCGA.E1.1A7O | 45 | Male   | 1.381560255 | 4.204679042 | diploid | Oligodendroglioma | III | Anaplastic oligodendroglioma, IDH-mutant | Codel            | PN | 2250 | 75    | 1 | Mutant | codel     | Methylated   | No combined CNA             | WT     |
| TCGA.E1.1A7P | 58 | Female | 4.583987671 | 5.45749058  | diploid | Oligodendroglioma | III | Anaplastic oligodendroglioma, NOS        | Classic-like     | NE | 1557 | 51.9  | 1 | WT     | non-codel | Methylated   | Gain chr 7 amp; loss chr 10 | WT     |
| TCGA.E1.1A7S | 71 | Male   | 0.970780046 | 3.139780528 | diploid | Oligodendroglioma | III | Anaplastic oligodendroglioma, IDH-mutant | Codel            | PN | 459  | 15.3  | 1 | Mutant | codel     | Methylated   | No combined CNA             | WT     |
| TCGA.E1.1A7U | 42 | Male   | 2.3934162   | 4.366560021 | diploid | Oligoastrocytoma  | II  | Anaplastic astrocytoma, IDH-mutant       | G-CIMP-high      | NE | 24   | 0.8   | 0 | Mutant | non-codel | Methylated   | No combined CNA             | WT     |
| TCGA.E1.1A7V | 26 | Female | 1.467696836 | 4.588264894 | diploid | Oligoastrocytoma  | II  | Anaplastic astrocytoma, IDH-mutant       | G-CIMP-low       | PN | 975  | 32.5  | 1 | Mutant | non-codel | Methylated   | No combined CNA             | Mutant |
| TCGA.E1.1A7W | 28 | Male   | 2.212444829 | 4.022207998 | diploid | Oligoastrocytoma  | II  | Diffuse astrocytoma, IDH-mutant          | G-CIMP-high      | PN | 1104 | 36.8  | 1 | Mutant | non-codel | Methylated   | No combined CNA             |        |

|              |    |        |              |             |         |                   |     |                                          |                  |    |      |       |   |        |           |              |                             |        |
|--------------|----|--------|--------------|-------------|---------|-------------------|-----|------------------------------------------|------------------|----|------|-------|---|--------|-----------|--------------|-----------------------------|--------|
| TCGA.FG.7636 | 48 | Male   | 2.785948049  | 4.465700261 | diploid | Astrocytoma       | III | Anaplastic astrocytoma, IDH-mutant       | G-CIMP-high      | PN | 537  | 17.9  | 0 | Mutant | non-codel | Methylated   | No combined CNA             | Mutant |
| TCGA.FG.7637 | 49 | Male   | 0.645148266  | 1.63862995  | NA      | Oligoastrocytoma  | II  | Diffuse astrocytoma, IDH-mutant          | CodeL            | PN | 1203 | 40.1  | 0 | Mutant | non-codel | Methylated   | No combined CNA             | WT     |
| TCGA.FG.7638 | 31 | Female | 2.617651119  | 4.060756448 | diploid | Oligodendroglioma | III | Anaplastic oligodendroglioma, IDH-mutant | CodeL            | NE | 678  | 22.6  | 0 | Mutant | non-codel | Methylated   | No combined CNA             | Mutant |
| TCGA.FG.7641 | 31 | Male   | 1.597698019  | 4.92499886  | diploid | Oligodendroglioma | II  | Oligodendroglioma, IDH-mutant and 1p/19  | CodeL            | NE | 618  | 20.6  | 0 | Mutant | non-codel | Methylated   | No combined CNA             | WT     |
| TCGA.FG.7643 | 49 | Female | 1.765831741  | 5.766436149 | Gain    | Oligoastrocytoma  | II  | Diffuse astrocytoma, IDH-wildtype        | Mesenchymal-like | NE | 603  | 20.1  | 0 | WT     | non-codel | Methylated   | No combined CNA             | WT     |
| TCGA.FG.8181 | 23 | Male   | 2.762221232  | 6.762501635 | diploid | Oligoastrocytoma  | II  | Anaplastic astrocytoma, IDH-wildtype     | PA-like          | NE | 849  | 28.3  | 0 | WT     | non-codel | Unmethylated | No combined CNA             | WT     |
| TCGA.FG.8182 | 35 | Male   | 2.736128588  | 3.539444219 | Gain    | Oligodendroglioma | II  | Oligodendroglioma, NOS                   | G-CIMP-high      | PN | 411  | 13.7  | 0 | Mutant | non-codel | Methylated   | No combined CNA             | Mutant |
| TCGA.FG.8185 | 37 | Male   | 2.947423038  | 2.65558081  | diploid | Astrocytoma       | III | Anaplastic astrocytoma, IDH-mutant       | G-CIMP-high      | PN | 426  | 14.2  | 0 | Mutant | non-codel | Methylated   | No combined CNA             | Mutant |
| TCGA.FG.8186 | 42 | Female | 0.061041705  | 4.053884622 | Gain    | Oligoastrocytoma  | III | Anaplastic oligodendroglioma, IDH-mutant | CodeL            | NE | 480  | 16.6  | 0 | Mutant | non-codel | Methylated   | No combined CNA             | WT     |
| TCGA.FG.8187 | 31 | Female | 2.095451881  | 4.326530158 | diploid | Oligoastrocytoma  | II  | Oligoastrocytoma, IDH-mutant and 1p/19   | CodeL            | NE | 603  | 20.1  | 0 | Mutant | non-codel | Methylated   | No combined CNA             | WT     |
| TCGA.FG.8188 | 41 | Male   | 2.793375711  | 1.846994687 | diploid | Oligoastrocytoma  | II  | Diffuse astrocytoma, IDH-mutant          | G-CIMP-high      | NE | 450  | 15    | 0 | Mutant | non-codel | Methylated   | No combined CNA             | Mutant |
| TCGA.FG.8189 | 33 | Female | 3.332836804  | 6.926744302 | diploid | Oligodendroglioma | II  | Oligodendroglioma, NOS                   | G-CIMP-high      | NE | 675  | 22.5  | 0 | Mutant | non-codel | Methylated   | No combined CNA             | WT     |
| TCGA.FG.8191 | 30 | Male   | 1.915138426  | 3.495886998 | diploid | Oligodendroglioma | III | Anaplastic oligodendroglioma, NOS        | G-CIMP-high      | PN | 978  | 32.6  | 0 | Mutant | non-codel | Unmethylated | No combined CNA             | Mutant |
| TCGA.FG.A4MT | 27 | Female | 1.916667717  | 4.354318154 | diploid | Oligodendroglioma | II  | Oligodendroglioma, NOS                   | G-CIMP-high      | PN | 1149 | 38.3  | 0 | Mutant | non-codel | Unmethylated | No combined CNA             | Mutant |
| TCGA.FG.A4MU | 58 | Male   | 3.253777534  | 5.457019647 | Gain    | Oligoastrocytoma  | III | Anaplastic astrocytoma, IDH-wildtype     | Mesenchymal-like | CL | 321  | 10.7  | 0 | WT     | non-codel | Methylated   | Gain chr 7 amp; loss chr 10 | WT     |
| TCGA.FG.A4MW | 63 | Male   | 3.129085148  | 4.740085653 | Gain    | Oligoastrocytoma  | III | Anaplastic astrocytoma, IDH-wildtype     | Classic-like     | CL | 552  | 18.4  | 1 | WT     | non-codel | Methylated   | Gain chr 7 amp; loss chr 10 | WT     |
| TCGA.FG.A4MX | 47 | Male   | 3.529066294  | 5.535228712 | diploid | Astrocytoma       | II  | Diffuse astrocytoma, IDH-mutant          | G-CIMP-high      | NE | 561  | 18.7  | 0 | Mutant | non-codel | Methylated   | No combined CNA             | Mutant |
| TCGA.FG.A4MY | 44 | Female | 2.176131252  | 3.589260133 | diploid | Oligoastrocytoma  | II  | Diffuse astrocytoma, IDH-mutant          | G-CIMP-high      | NE | 711  | 23.7  | 0 | Mutant | non-codel | Methylated   | No combined CNA             | Mutant |
| TCGA.FG.A60J | 47 | Female | 1.774375932  | 4.079294192 | diploid | Oligoastrocytoma  | II  | Diffuse astrocytoma, IDH-mutant          | G-CIMP-high      | PN | 444  | 14.8  | 0 | Mutant | non-codel | Methylated   | No combined CNA             | WT     |
| TCGA.FG.A60K | 34 | Female | 2.107922163  | 3.503819379 | diploid | Oligoastrocytoma  | II  | Oligodendroglioma, IDH-mutant and 1p/19  | CodeL            | PN | 534  | 17.8  | 0 | Mutant | non-codel | Methylated   | No combined CNA             | WT     |
| TCGA.FG.A60L | 34 | Female | 3.294547234  | 4.056644217 | Gain    | Astrocytoma       | II  | Diffuse astrocytoma, IDH-mutant          | G-CIMP-high      | PN | 645  | 21.5  | 0 | Mutant | non-codel | Methylated   | No combined CNA             | WT     |
| TCGA.FG.A6I2 | 60 | Male   | 3.122225431  | 3.148478616 | diploid | Oligodendroglioma | II  | Oligodendroglioma, IDH-mutant and 1p/19  | CodeL            | PN | 450  | 15    | 0 | Mutant | non-codel | Methylated   | No combined CNA             | WT     |
| TCGA.FG.A6I3 | 44 | Female | 3.332937028  | 4.451277062 | diploid | Oligodendroglioma | II  | Oligodendroglioma, IDH-mutant and 1p/19  | CodeL            | PN | 452  | 16.4  | 0 | Mutant | non-codel | Methylated   | No combined CNA             | WT     |
| TCGA.FG.A6I4 | 38 | Female | 2.513494825  | 3.654392158 | diploid | Astrocytoma       | III | Anaplastic astrocytoma, IDH-mutant       | G-CIMP-low       | ME | 669  | 22.3  | 0 | Mutant | non-codel | Methylated   | No combined CNA             | Mutant |
| TCGA.FG.A70Y | 20 | Female | 3.961197309  | 3.129054243 | diploid | Oligodendroglioma | II  | Oligodendroglioma, NOS                   | G-CIMP-high      | NE | 855  | 28.5  | 0 | Mutant | non-codel | Methylated   | No combined CNA             | Mutant |
| TCGA.FG.A70Z | 53 | Female | 4.105745116  | 4.872158957 | Gain    | Oligoastrocytoma  | III | Anaplastic astrocytoma, IDH-wildtype     | Mesenchymal-like | CL | 324  | 10.8  | 0 | WT     | non-codel | Methylated   | Gain chr 7 amp; loss chr 10 | WT     |
| TCGA.FG.A710 | 50 | Female | 3.82767678   | 4.193038384 | diploid | Oligodendroglioma | II  | Oligodendroglioma, IDH-mutant and 1p/19  | CodeL            | PN | 1101 | 36.7  | 0 | Mutant | non-codel | Methylated   | No combined CNA             | WT     |
| TCGA.FG.A711 | 33 | Female | 2.41267315   | 4.641829223 | Gain    | Oligodendroglioma | II  | Oligodendroglioma, NOS                   | G-CIMP-high      | NE | 1461 | 40.7  | 1 | Mutant | non-codel | Unmethylated | No combined CNA             | Mutant |
| TCGA.FG.A713 | 74 | Female | 2.969141278  | 6.303375276 | diploid | Oligoastrocytoma  | II  | Oligodendroglioma, IDH-mutant and 1p/19  | CodeL            | NE | 612  | 28.4  | 0 | Mutant | non-codel | Methylated   | No combined CNA             | Mutant |
| TCGA.FG.A87N | 37 | Female | 2.469885976  | 4.183232413 | diploid | Astrocytoma       | III | Anaplastic astrocytoma, IDH-mutant       | G-CIMP-low       | NE | 558  | 18.6  | 0 | Mutant | non-codel | Methylated   | No combined CNA             | WT     |
| TCGA.FG.A89Q | 61 | Female | 2.598804923  | 2.255500733 | Gain    | Astrocytoma       | III | Anaplastic astrocytoma, IDH-wildtype     | Classic-like     | CL | 171  | 5.7   | 0 | WT     | non-codel | Methylated   | Gain chr 7 amp; loss chr 10 | WT     |
| TCGA.FN.7833 | 25 | Male   | 3.492712046  | 3.86409698  | diploid | Oligoastrocytoma  | III | Anaplastic astrocytoma, IDH-mutant       | G-CIMP-high      | NE | 825  | 27.5  | 0 | Mutant | non-codel | Methylated   | No combined CNA             | Mutant |
| TCGA.HT.7467 | 54 | Male   | 1.911911216  | 4.841490128 | diploid | Oligodendroglioma | II  | Oligodendroglioma, IDH-mutant and 1p/19  | CodeL            | NE | 3    | 0.1   | 0 | Mutant | non-codel | Methylated   | No combined CNA             | WT     |
| TCGA.HT.7468 | 30 | Male   | 0.837216667  | 2.516090811 | diploid | Oligodendroglioma | III | Anaplastic oligodendroglioma, IDH-mutant | CodeL            | PN | 201  | 6.7   | 0 | Mutant | non-codel | Methylated   | No combined CNA             | WT     |
| TCGA.HT.7469 | 30 | Male   | 2.741553276  | 3.369089533 | diploid | Oligodendroglioma | III | Anaplastic oligodendroglioma, NOS        | PA-like          | CL | 175  | 6.5   | 1 | WT     | non-codel | Methylated   | No combined CNA             | Mutant |
| TCGA.HT.7470 | 37 | Male   | 2.791418187  | 5.049482657 | diploid | Oligodendroglioma | III | Anaplastic oligodendroglioma, NOS        | G-CIMP-high      | NE | 1203 | 40.1  | 1 | Mutant | non-codel | Methylated   | No combined CNA             | Mutant |
| TCGA.HT.7471 | 37 | Female | 2.304503366  | 3.579168077 | diploid | Oligodendroglioma | III | Anaplastic oligodendroglioma, IDH-mutant | CodeL            | PN | 3    | 0.1   | 0 | Mutant | non-codel | Methylated   | No combined CNA             | Mutant |
| TCGA.HT.7472 | 38 | Female | 2.828916102  | 1.950521873 | diploid | Oligodendroglioma | III | Oligodendroglioma, NOS                   | G-CIMP-low       | PN | 0    | 0     | 0 | Mutant | non-codel | Methylated   | No combined CNA             | WT     |
| TCGA.HT.7473 | 28 | Male   | 4.708374874  | 2.997816272 | Gain    | Oligoastrocytoma  | II  | Diffuse astrocytoma, IDH-mutant          | G-CIMP-high      | NE | 495  | 16.5  | 0 | Mutant | non-codel | Unmethylated | No combined CNA             | Mutant |
| TCGA.HT.7474 | 52 | Male   | 2.708739041  | 5.330328927 | diploid | Oligoastrocytoma  | II  | Diffuse astrocytoma, IDH-mutant          | G-CIMP-high      | NE | 114  | 3.8   | 0 | Mutant | non-codel | Methylated   | No combined CNA             | Mutant |
| TCGA.HT.7475 | 67 | Male   | 0.864176238  | 5.192277031 | diploid | Oligoastrocytoma  | III | Anaplastic astrocytoma, IDH-mutant       | G-CIMP-high      | NE | 522  | 17.4  | 0 | Mutant | non-codel | Methylated   | No combined CNA             | Mutant |
| TCGA.HT.7476 | 26 | Male   | 4.558587896  | 4.761136315 | diploid | Astrocytoma       | II  | Diffuse astrocytoma, IDH-mutant          | G-CIMP-high      | NE | 195  | 6.5   | 0 | Mutant | non-codel | Methylated   | No combined CNA             | Mutant |
| TCGA.HT.7477 | 62 | Male   | 2.211697545  | 4.547283241 | Gain    | Astrocytoma       | III | Anaplastic astrocytoma, IDH-mutant       | G-CIMP-high      | PN | 729  | 24.3  | 0 | Mutant | non-codel | Methylated   | No combined CNA             | Mutant |
| TCGA.HT.7478 | 36 | Male   | 3.003854057  | 3.640297002 | diploid | Astrocytoma       | II  | Diffuse astrocytoma, IDH-mutant          | G-CIMP-high      | ME | 192  | 6.3   | 0 | Mutant | non-codel | Unmethylated | No combined CNA             | Mutant |
| TCGA.HT.7479 | 44 | Male   | 3.143475054  | 3.39179521  | diploid | Astrocytoma       | III | Anaplastic astrocytoma, IDH-mutant       | G-CIMP-high      | NE | 1209 | 40.3  | 0 | Mutant | non-codel | Methylated   | No combined CNA             | WT     |
| TCGA.HT.7480 | 33 | Male   | 1.386424705  | 4.024124611 | diploid | Oligodendroglioma | II  | Oligodendroglioma, IDH-mutant and 1p/19  | CodeL            | PN | 2256 | 75.2  | 0 | Mutant | non-codel | Methylated   | No combined CNA             | WT     |
| TCGA.HT.7481 | 39 | Male   | -0.177555361 | 4.133185377 | diploid | Oligodendroglioma | II  | Oligodendroglioma, IDH-mutant and 1p/19  | CodeL            | NE | 2877 | 95.9  | 0 | Mutant | non-codel | Methylated   | No combined CNA             | WT     |
| TCGA.HT.7482 | 18 | Female | 2.798071258  | 2.67737293  | diploid | Oligoastrocytoma  | II  | Diffuse astrocytoma, IDH-mutant          | G-CIMP-high      | PN | 3210 | 107.9 | 0 | Mutant | non-codel | Methylated   | No combined CNA             | Mutant |
| TCGA.HT.7483 | 14 | Male   | 1.208454831  | 3.917489042 | diploid | Oligoastrocytoma  | II  | Diffuse astrocytoma, IDH-mutant          | G-CIMP-high      | PN | 514  | 17.2  | 0 | Mutant | non-codel | Unmethylated | No combined CNA             | Mutant |
| TCGA.HT.7484 | 42 | Male   | 2.665324546  | 1.299420514 | diploid | Astrocytoma       | II  | Diffuse astrocytoma, IDH-mutant          | G-CIMP-high      | NE | 1280 | 4.4   | 0 | Mutant | non-codel | Methylated   | No combined CNA             | Mutant |
| TCGA.HT.7601 | 30 | Female | 3.767934859  | 3.054520753 | diploid | Astrocytoma       | III | Anaplastic astrocytoma, IDH-mutant       | G-CIMP-high      | NE | 150  | 5     | 0 | Mutant | non-codel | Methylated   | No combined CNA             | WT     |
| TCGA.HT.7602 | 21 | Male   | 2.871488844  | 3.506728872 | diploid | Oligodendroglioma | II  | Oligodendroglioma, NOS                   | G-CIMP-high      | NE | 897  | 29.9  | 0 | Mutant | non-codel | Methylated   | No combined CNA             | WT     |
| TCGA.HT.7603 | 29 | Male   | 3.210373278  | 6.015682627 | diploid | Oligodendroglioma | II  | Oligodendroglioma, NOS                   | G-CIMP-high      | NE | 686  | 23.2  | 0 | Mutant | non-codel | Methylated   | No combined CNA             | Mutant |
| TCGA.HT.7604 | 50 | Male   | 1.785843455  | 2.571506928 | Gain    | Astrocytoma       | II  | Diffuse astrocytoma, IDH-mutant          | G-CIMP-high      | PN | 3675 | 122.5 | 0 | Mutant | non-codel | Methylated   | No combined CNA             | Mutant |
| TCGA.HT.7605 | 38 | Male   | 1.976510281  | 5.224727182 | diploid | Oligodendroglioma | II  | Oligodendroglioma, IDH-mutant and 1p/19  | CodeL            | NE | 138  | 4.6   | 0 | Mutant | non-codel | Methylated   | No combined CNA             | WT     |
| TCGA.HT.7606 | 30 | Female | 2.358846331  | 3.756201359 | diploid | Astrocytoma       | II  | Diffuse astrocytoma, IDH-mutant          | G-CIMP-high      | PN | 519  | 17.3  | 0 | Mutant | non-codel | Unmethylated | No combined CNA             | WT     |
| TCGA.HT.7607 | 61 | Female | 2.286023554  | 5.468840685 | diploid | Astrocytoma       | II  | Diffuse astrocytoma, IDH-mutant          | CodeL            | NE | 9    | 0.2   | 1 | Mutant | non-codel | Methylated   | No combined CNA             | WT     |
| TCGA.HT.7608 | 61 | Male   | 1.885105754  | 3.125006307 | diploid | Oligoastrocytoma  | II  | Oligodendroglioma, IDH-mutant and 1p/19  | CodeL            | NE | 663  | 22.1  | 0 | Mutant | non-codel | Methylated   | No combined CNA             | WT     |
| TCGA.HT.7609 | 34 | Male   | 1.040120917  | 1.925847548 | diploid | Oligoastrocytoma  | III | Anaplastic astrocytoma, IDH-mutant       | G-CIMP-high      | PN | 1380 | 46.6  | 0 | Mutant | non-codel | Methylated   | No combined CNA             | WT     |
| TCGA.HT.7610 | 25 | Female | 1.909465911  | 5.039230534 | Gain    | Oligoastrocytoma  | II  | Diffuse astrocytoma, IDH-mutant          | G-CIMP-high      | NE | 1683 | 56.1  | 0 | Mutant | non-codel | Methylated   | No combined CNA             | Mutant |
| TCGA.HT.7611 | 36 | Male   | 2.44993108   | 2.613932346 | diploid | Oligoastrocytoma  | II  | Diffuse astrocytoma, IDH-mutant          | G-CIMP-high      | NE | 1728 | 57.6  | 0 | Mutant | non-codel | Methylated   | No combined CNA             | Mutant |
| TCGA.HT.7616 | 75 | Male   | 3.794374275  | 1.887525271 | diploid | Oligodendroglioma | III | Anaplastic oligodendroglioma, IDH-mutant | CodeL            | ME | 6    | 0.2   | 1 | Mutant | non-codel | Methylated   | No combined CNA             | WT     |
| TCGA.HT.7620 | 40 | Male   | 1.382667253  | 2.494927567 | diploid | Oligodendroglioma | III | Anaplastic oligodendroglioma, IDH-mutant | CodeL            | PN | 429  | 14.3  | 0 | Mutant | non-codel | Methylated   | No combined CNA             | WT     |
| TCGA.HT.7676 | 26 | Male   | 3.548991401  | 2.529596093 | diploid | Oligodendroglioma | II  | Oligodendroglioma, NOS                   | G-CIMP-high      | PN | 6    | 0.2   | 0 | Mutant | non-codel | Unmethylated | No combined CNA             | Mutant |
| TCGA.HT.7677 | 53 | Male   | 1.168834553  | 3.621008001 | diploid | Oligodendroglioma | III | Anaplastic oligodendroglioma, IDH-mutant | CodeL            | PN | 486  | 16.2  | 0 | Mutant | non-codel | Methylated   | No combined CNA             | WT     |
| TCGA.HT.7680 | 29 | Female | 2.832190204  | 4.568916763 | diploid | Astrocytoma       | III | Diffuse astrocytoma, IDH-wildtype        | PA-like          | NE | 24   | 0.8   | 0 | Mutant | non-codel | Unmethylated | No combined CNA             | WT     |
| TCGA.HT.7681 | 29 | Female | 3.087904069  | 4.968754331 | diploid | Oligoastrocytoma  | II  | Oligodendroglioma, IDH-mutant and 1p/19  | CodeL            | NE | 1341 | 44.7  | 0 | Mutant | non-codel | Methylated   | No combined CNA             | WT     |
| TCGA.HT.7684 | 58 | Male   | 3.175285063  | 2.075498403 | diploid | Oligoastrocytoma  | III | Anaplastic astrocytoma, IDH-mutant       | G-CIMP-high      | NE | 180  | 6     | 0 | Mutant | non-codel | Methylated   | No combined CNA             | WT     |
| TCGA.HT.7686 | 29 | Female | 3.847395658  | 2.731748042 | diploid | Astrocytoma       | III | Anaplastic astrocytoma, IDH-mutant       | G-CIMP-high      | NE | 1281 | 42.7  | 0 | Mutant | non-codel | Methylated   | No combined CNA             | Mutant |
| TCGA.HT.7687 | 74 | Male   | 1.738594919  | 5.575039984 | diploid | Oligodendroglioma | II  | Anaplastic oligodendroglioma, IDH-mutant | CodeL            | PN | 3    | 0.1   | 0 | Mutant | non-codel | Methylated   | No combined CNA             | WT     |
| TCGA.HT.7688 | 5  |        |              |             |         |                   |     |                                          |                  |    |      |       |   |        |           |              |                             |        |

|              |    |        |              |             |           |                   |     |                                          |                  |    |      |      |   |        |           |              |                             |        |
|--------------|----|--------|--------------|-------------|-----------|-------------------|-----|------------------------------------------|------------------|----|------|------|---|--------|-----------|--------------|-----------------------------|--------|
| TCGA.HT.7879 | 31 | Male   | 3.338481465  | 3.439370478 | diploid   | Oligoastrocytoma  | III | Anaplastic astrocytoma, IDH-mutant       | G-CIMP-high      | PN | 111  | 3.7  | 0 | Mutant | non-codel | Methylated   | No combined CNA             | Mutant |
| TCGA.HT.7880 | 30 | Male   | 3.180466161  | 5.429666173 | diploid   | Oligoastrocytoma  | II  | Diffuse astrocytoma, IDH-mutant          | G-CIMP-high      | NE | 159  | 5.3  | 0 | Mutant | non-codel | Methylated   | No combined CNA             | Mutant |
| TCGA.HT.7881 | 38 | Male   | 2.190203958  | 5.203368887 | diploid   | Oligodendroglioma | II  | Oligodendroglioma, IDH-mutant and 1p/19  | CodeL            | NE | 1065 | 35.5 | 0 | Mutant | non-codel | Methylated   | No combined CNA             | WT     |
| TCGA.HT.7882 | 66 | Male   | 3.487048947  | 5.223677393 | Gain      | Oligodendroglioma | III | Anaplastic oligodendroglioma, NOS        | Mesenchymal-like | ME | 111  | 3.7  | 1 | WT     | non-codel | Methylated   | No combined CNA             | WT     |
| TCGA.HT.7884 | 44 | Female | 1.932817103  | 4.396460933 | Gain      | Astrocytoma       | II  | Astrocytoma, IDH-mutant                  | G-CIMP-high      | PN | 339  | 11.3 | 0 | Mutant | non-codel | Methylated   | No combined CNA             | Mutant |
| TCGA.HT.7902 | 30 | Female | 2.315160433  | 4.561582756 | diploid   | Oligoastrocytoma  | II  | Diffuse astrocytoma, IDH-mutant          | G-CIMP-high      | NE | 942  | 31.4 | 0 | Mutant | non-codel | Methylated   | No combined CNA             | Mutant |
| TCGA.HT.8010 | 64 | Female | 1.394349504  | 5.545551434 | diploid   | Oligodendroglioma | II  | Oligodendroglioma, IDH-mutant and 1p/19  | CodeL            | NE | 94   | 1.6  | 0 | Mutant | non-codel | Methylated   | No combined CNA             | WT     |
| TCGA.HT.8011 | 55 | Male   | 1.979732709  | 6.199342548 | Gain      | Astrocytoma       | III | Anaplastic astrocytoma, IDH-wildtype     | Mesenchymal-like | NE | 486  | 16.2 | 0 | WT     | non-codel | Unmethylated | Gain chr 7 amp; loss chr 10 | WT     |
| TCGA.HT.8012 | 30 | Female | 2.189824559  | 4.273560647 | diploid   | Oligodendroglioma | II  | Oligodendroglioma, IDH-mutant and 1p/19  | CodeL            | PN | 282  | 9.4  | 0 | Mutant | non-codel | Methylated   | No combined CNA             | WT     |
| TCGA.HT.8013 | 37 | Female | 4.741267422  | 5.529146293 | Gain      | Oligoastrocytoma  | II  | Diffuse astrocytoma, IDH-mutant          | G-CIMP-high      | PN | 1905 | 63.5 | 1 | Mutant | non-codel | Methylated   | No combined CNA             | Mutant |
| TCGA.HT.8015 | 21 | Male   | 4.223878147  | 6.259377954 | diploid   | Astrocytoma       | II  | Diffuse astrocytoma, IDH-wildtype        | PA-like          | NE | 3    | 0.1  | 0 | WT     | non-codel | Unmethylated | No combined CNA             | WT     |
| TCGA.HT.8018 | 40 | Female | 3.611609136  | 5.455623127 | diploid   | Oligoastrocytoma  | II  | Diffuse astrocytoma, IDH-mutant          | G-CIMP-high      | NE | 1137 | 37.9 | 1 | Mutant | non-codel | Methylated   | No combined CNA             | WT     |
| TCGA.HT.8019 | 34 | Female | 3.182310918  | 7.023700026 | diploid   | Oligodendroglioma | III | Anaplastic oligodendroglioma, NOS        | PA-like          | NE | 990  | 33   | 0 | WT     | non-codel | Unmethylated | No combined CNA             | WT     |
| TCGA.HT.8104 | 51 | Female | 3.122059733  | 5.010560554 | Gain      | Astrocytoma       | III | Anaplastic astrocytoma, IDH-wildtype     | Classic-like     | CL | 366  | 12.2 | 0 | WT     | non-codel | Unmethylated | Gain chr 7 amp; loss chr 10 | WT     |
| TCGA.HT.8105 | 54 | Male   | 1.486765851  | 4.546456184 | diploid   | Oligodendroglioma | III | Anaplastic oligodendroglioma, IDH-mutant | CodeL            | PN | 186  | 6.2  | 0 | Mutant | non-codel | Methylated   | No combined CNA             | WT     |
| TCGA.HT.8106 | 53 | Male   | 5.325789346  | 4.057432942 | diploid   | Astrocytoma       | III | Anaplastic astrocytoma, IDH-mutant       | G-CIMP-high      | ME | 3    | 0.1  | 0 | Mutant | non-codel | Methylated   | No combined CNA             | WT     |
| TCGA.HT.8107 | 62 | Male   | 0.913569218  | 6.386914386 | diploid   | Oligodendroglioma | II  | Oligodendroglioma, NOS                   | PA-like          | NE | 15   | 0.5  | 0 | WT     | non-codel | Methylated   | No combined CNA             | WT     |
| TCGA.HT.8108 | 26 | Female | 2.997671777  | 3.042294126 | Gain      | Oligodendroglioma | II  | Oligodendroglioma, NOS                   | G-CIMP-high      | PN | 75   | 2.5  | 0 | Mutant | non-codel | Methylated   | No combined CNA             | Mutant |
| TCGA.HT.8109 | 64 | Male   | 2.915616504  | 4.322822289 | diploid   | Oligodendroglioma | III | Anaplastic oligodendroglioma, IDH-mutant | CodeL            | NE | 168  | 5.6  | 0 | Mutant | non-codel | Methylated   | No combined CNA             | WT     |
| TCGA.HT.8110 | 57 | Male   | 4.851973859  | 7.033594793 | Gain      | Astrocytoma       | III | Anaplastic astrocytoma, IDH-wildtype     | Mesenchymal-like | ME | 414  | 13.8 | 0 | WT     | non-codel | Methylated   | Gain chr 7 amp; loss chr 10 | WT     |
| TCGA.HT.8111 | 32 | Male   | 3.763783355  | 4.122881001 | diploid   | Oligoastrocytoma  | III | Anaplastic astrocytoma, IDH-mutant       | G-CIMP-high      | PN | 6    | 0.2  | 0 | Mutant | non-codel | Methylated   | No combined CNA             | WT     |
| TCGA.HT.8113 | 49 | Female | 2.312316654  | 6.549347277 | diploid   | Oligodendroglioma | II  | Oligodendroglioma, NOS                   | CodeL            | NE | 888  | 29.6 | 0 | Mutant | non-codel | Methylated   | No combined CNA             | WT     |
| TCGA.HT.8114 | 36 | Male   | 4.368272468  | 2.82535825  | Gain      | Oligoastrocytoma  | III | Anaplastic astrocytoma, IDH-mutant       | G-CIMP-high      | NE | 1026 | 34.2 | 0 | Mutant | non-codel | Methylated   | No combined CNA             | Mutant |
| TCGA.HT.8529 | 29 | Female | 3.225894329  | 5.332146389 | NA        | Oligodendroglioma | II  | Oligodendroglioma, NOS                   | PA-like          | NE | 411  | 13.7 | 0 | WT     | non-codel | Unmethylated | Gain chr 7 amp; loss chr 10 | WT     |
| TCGA.HT.8563 | 30 | Female | 4.999702413  | 2.944764761 | diploid   | Astrocytoma       | III | Anaplastic astrocytoma, IDH-mutant       | G-CIMP-high      | NE | 849  | 28.3 | 0 | Mutant | non-codel | Unmethylated | No combined CNA             | Mutant |
| TCGA.HT.8564 | 47 | Male   | 3.235635166  | 5.91179942  | Gain      | Astrocytoma       | III | Anaplastic astrocytoma, IDH-wildtype     | PA-like          | NE | 471  | 15.7 | 0 | WT     | non-codel | Unmethylated | No combined CNA             | WT     |
| TCGA.HT.ADS  | 55 | Female | 5.951042205  | 6.168094423 | Gain      | Astrocytoma       | III | Anaplastic astrocytoma, IDH-wildtype     | Mesenchymal-like | CL | 6    | 0.2  | 0 | WT     | non-codel | Unmethylated | No combined CNA             | WT     |
| TCGA.HT.ADV  | 51 | Female | 1.887525271  | 5.00162212  | diploid   | Oligodendroglioma | II  | Anaplastic oligodendroglioma, IDH-mutant | CodeL            | NE | 780  | 2.6  | 0 | Mutant | non-codel | Methylated   | No combined CNA             | WT     |
| TCGA.HT.A5R5 | 33 | Female | 3.034972791  | 4.915367923 | Gain      | Oligodendroglioma | II  | Oligodendroglioma, NOS                   | G-CIMP-high      | NE | 3    | 0.1  | 0 | Mutant | non-codel | Methylated   | No combined CNA             | Mutant |
| TCGA.HT.A5R7 | 33 | Female | 2.265676925  | 5.600341125 | NA        | Astrocytoma       | III | Anaplastic astrocytoma, IDH-mutant       | G-CIMP-high      | NE | 606  | 20.2 | 0 | Mutant | non-codel | Methylated   | No combined CNA             | Mutant |
| TCGA.HT.A5R9 | 48 | Female | 0.889317778  | 5.010457613 | Gain      | Oligodendroglioma | II  | Anaplastic oligodendroglioma, IDH-mutant | CodeL            | PN | 3    | 0.1  | 0 | Mutant | non-codel | Methylated   | No combined CNA             | WT     |
| TCGA.HT.A5RA | 65 | Female | 3.977783634  | 3.399116393 | Gain      | Astrocytoma       | III | Anaplastic astrocytoma, IDH-wildtype     | Mesenchymal-like | CL | 822  | 27.4 | 0 | WT     | non-codel | Unmethylated | No combined CNA             | WT     |
| TCGA.HT.A5RB | 24 | Male   | 2.644456226  | 4.647809523 | diploid   | Astrocytoma       | III | Diffuse astrocytoma, IDH-mutant          | G-CIMP-high      | PN | 3    | 0.1  | 0 | Mutant | non-codel | Methylated   | No combined CNA             | Mutant |
| TCGA.HT.A5RC | 70 | Female | 3.31314425   | 3.435068474 | Gain      | Astrocytoma       | III | Anaplastic astrocytoma, IDH-wildtype     | Classic-like     | CL | 159  | 5.3  | 1 | WT     | non-codel | Unmethylated | Gain chr 7 amp; loss chr 10 | WT     |
| TCGA.HT.A614 | 47 | Male   | 2.966448925  | 4.348736557 | diploid   | Oligoastrocytoma  | II  | Diffuse astrocytoma, IDH-mutant          | G-CIMP-high      | PN | 81   | 2.7  | 0 | Mutant | non-codel | Methylated   | No combined CNA             | Mutant |
| TCGA.HT.A615 | 38 | Female | 4.323103412  | 3.67226892  | diploid   | Oligodendroglioma | II  | Oligodendroglioma, IDH-mutant and 1p/19  | CodeL            | NE | 507  | 16.9 | 0 | Mutant | non-codel | Methylated   | No combined CNA             | WT     |
| TCGA.HT.A616 | 36 | Female | 2.120517834  | 4.775129577 | Gain      | Astrocytoma       | II  | Diffuse astrocytoma, IDH-mutant          | G-CIMP-high      | NE | 54   | 1.8  | 0 | Mutant | non-codel | Methylated   | No combined CNA             | Mutant |
| TCGA.HT.A617 | 47 | Male   | 4.693348369  | 4.727289797 | Gain      | Oligodendroglioma | II  | Oligodendroglioma, NOS                   | Classic-like     | CL | 483  | 16.1 | 0 | WT     | non-codel | Unmethylated | Gain chr 7 amp; loss chr 10 | WT     |
| TCGA.HT.A618 | 37 | Female | 4.146027898  | 3.488827371 | NA        | Astrocytoma       | III | Anaplastic astrocytoma, IDH-mutant       | G-CIMP-high      | CL | 504  | 16.8 | 0 | Mutant | non-codel | Methylated   | No combined CNA             | Mutant |
| TCGA.HT.A619 | 51 | Female | -0.069908106 | 2.548781844 | Gain      | Oligodendroglioma | II  | Anaplastic oligodendroglioma, IDH-mutant | CodeL            | PN | 642  | 21.4 | 0 | Mutant | non-codel | Methylated   | No combined CNA             | WT     |
| TCGA.HT.A61A | 20 | Female | 4.083715458  | 6.565373296 | NA        | Oligodendroglioma | II  | Oligodendroglioma, NOS                   | G-CIMP-high      | PN | 192  | 6.4  | 0 | Mutant | non-codel | Methylated   | No combined CNA             | WT     |
| TCGA.HT.A61B | 22 | Male   | 4.664869631  | 4.243128274 | diploid   | Astrocytoma       | III | Anaplastic astrocytoma, IDH-mutant       | G-CIMP-high      | NE | 525  | 17.5 | 0 | Mutant | non-codel | Methylated   | No combined CNA             | WT     |
| TCGA.HT.A61C | 66 | Male   | 4.413966352  | 6.530056692 | Gain      | Oligodendroglioma | II  | Anaplastic oligodendroglioma, NOS        | Mesenchymal-like | NE | 728  | 27.6 | 1 | WT     | non-codel | Unmethylated | Gain chr 7 amp; loss chr 10 | WT     |
| TCGA.HT.A74H | 62 | Male   | 4.67827477   | 8.380711269 | Gain      | Astrocytoma       | III | Anaplastic astrocytoma, IDH-wildtype     | Mesenchymal-like | NE | 52   | 1.4  | 0 | WT     | non-codel | Unmethylated | Gain chr 7 amp; loss chr 10 | WT     |
| TCGA.HT.A74J | 33 | Male   | 2.713255902  | 5.838447593 | Gain      | Oligoastrocytoma  | II  | Diffuse astrocytoma, IDH-mutant          | G-CIMP-high      | PN | 315  | 10.5 | 0 | Mutant | non-codel | Unmethylated | No combined CNA             | Mutant |
| TCGA.HT.A74K | 58 | Female | 4.320520781  | 3.724803045 | Gain      | Oligodendroglioma | III | Anaplastic oligodendroglioma, IDH-mutant | CodeL            | PN | 459  | 15.3 | 0 | Mutant | non-codel | Methylated   | No combined CNA             | WT     |
| TCGA.HT.A74L | 22 | Female | 1.541316585  | 2.349761568 | Gain      | Oligoastrocytoma  | II  | Oligodendroglioma, IDH-mutant and 1p/19  | CodeL            | PN | 333  | 11.1 | 0 | Mutant | non-codel | Methylated   | No combined CNA             | WT     |
| TCGA.HT.A74O | 34 | Male   | 5.257365212  | 3.544867523 | Gain      | Astrocytoma       | III | Anaplastic astrocytoma, IDH-mutant       | G-CIMP-high      | PN | 3    | 0.1  | 0 | Mutant | non-codel | Methylated   | No combined CNA             | Mutant |
| TCGA.HW.7486 | 37 | Male   | 2.858378925  | 2.896736847 | diploid   | Oligodendroglioma | II  | Oligodendroglioma, IDH-mutant and 1p/19  | CodeL            | NE | 1698 | 56.6 | 0 | Mutant | non-codel | Methylated   | No combined CNA             | WT     |
| TCGA.HW.7487 | 39 | Male   | -1           | 5.274533772 | diploid   | Oligodendroglioma | II  | Oligodendroglioma, IDH-mutant and 1p/19  | CodeL            | PN | 402  | 13.4 | 0 | Mutant | non-codel | Methylated   | No combined CNA             | WT     |
| TCGA.HW.7489 | 38 | Male   | 1.716112942  | 5.365481414 | diploid   | Oligoastrocytoma  | II  | Diffuse astrocytoma, IDH-mutant          | G-CIMP-high      | NE | 1245 | 41.5 | 1 | Mutant | non-codel | Methylated   | No combined CNA             | Mutant |
| TCGA.HW.7490 | 41 | Male   | 2.857762087  | 2.198337619 | diploid   | Astrocytoma       | II  | Diffuse astrocytoma, IDH-mutant          | G-CIMP-high      | PN | 1368 | 45.6 | 0 | Mutant | non-codel | Methylated   | No combined CNA             | Mutant |
| TCGA.HW.7491 | 35 | Male   | 0.454070583  | 2.39536494  | diploid   | Oligodendroglioma | II  | Oligodendroglioma, IDH-mutant and 1p/19  | CodeL            | PN | 2049 | 68.3 | 0 | Mutant | non-codel | Unmethylated | No combined CNA             | WT     |
| TCGA.HW.7493 | 40 | Female | 2.505179567  | 4.62862197  | diploid   | Astrocytoma       | II  | Diffuse astrocytoma, NOS                 | CodeL            | NE | 2079 | 69.3 | 0 | Mutant | non-codel | Methylated   | No combined CNA             | WT     |
| TCGA.HW.7495 | 45 | Female | 1.983166916  | 4.743995951 | Gain      | Oligodendroglioma | II  | Oligodendroglioma, IDH-mutant and 1p/19  | CodeL            | NE | 1062 | 35.4 | 0 | Mutant | non-codel | Methylated   | No combined CNA             | WT     |
| TCGA.HW.8319 | 34 | Female | 2.206393169  | 4.737984138 | diploid   | Astrocytoma       | III | Anaplastic astrocytoma, IDH-mutant       | G-CIMP-high      | PN | 1194 | 39.8 | 1 | Mutant | non-codel | Unmethylated | No combined CNA             | Mutant |
| TCGA.HW.8320 | 36 | Male   | 2.335997677  | 3.081390762 | diploid   | Astrocytoma       | III | Anaplastic astrocytoma, IDH-mutant       | G-CIMP-high      | PN | 1200 | 40   | 0 | Mutant | non-codel | Methylated   | No combined CNA             | WT     |
| TCGA.HW.8321 | 31 | Male   | 0.556797247  | 3.833740194 | diploid   | Astrocytoma       | III | Anaplastic astrocytoma, IDH-mutant       | G-CIMP-high      | PN | 1275 | 42.5 | 0 | Mutant | non-codel | Methylated   | No combined CNA             | WT     |
| TCGA.HW.8322 | 39 | Male   | 2.001694172  | 5.180744616 | Gain      | Oligodendroglioma | II  | Oligodendroglioma, IDH-mutant and 1p/19  | CodeL            | PN | 186  | 6.2  | 0 | Mutant | non-codel | Methylated   | No combined CNA             | WT     |
| TCGA.HW.A5KJ | 68 | Male   | 0.994072791  | 4.671723626 | Gain      | Oligodendroglioma | III | Anaplastic oligodendroglioma, IDH-mutant | CodeL            | PN | 318  | 10.6 | 0 | Mutant | non-codel | Methylated   | No combined CNA             | WT     |
| TCGA.HW.A5KK | 64 | Male   | 4.871986531  | 7.065150056 | diploid   | Astrocytoma       | III | Anaplastic astrocytoma, IDH-wildtype     | Mesenchymal-like | CL | 384  | 12.8 | 1 | WT     | non-codel | Methylated   | No combined CNA             | WT     |
| TCGA.HW.A5KL | 42 | Female | 2.611361264  | 2.422959548 | diploid   | Astrocytoma       | II  | Diffuse astrocytoma, IDH-mutant          | G-CIMP-high      | PN | 624  | 20.8 | 0 | Mutant | non-codel | Methylated   | No combined CNA             | Mutant |
| TCGA.HW.A5KM | 35 | Male   | 5.922000368  | 1.509493166 | Gain      | Astrocytoma       | II  | Diffuse astrocytoma, IDH-mutant          | G-CIMP-high      | ME | 624  | 20.7 | 0 | Mutant | non-codel | Methylated   | No combined CNA             | WT     |
| TCGA.IK.7675 | 43 | Male   | 2.30591217   | 1.981399911 | diploid   | Oligodendroglioma | II  | Oligodendroglioma, NOS                   | G-CIMP-high      | PN | 179  | 5.9  | 1 | Mutant | non-codel | Methylated   | No combined CNA             | Mutant |
| TCGA.IK.S125 | 62 | Male   | 2.4423251849 | 4.296200214 | diploid   | Oligoastrocytoma  | III | Anaplastic oligodendroglioma, IDH-mutant | CodeL            | NE | 570  | 12.8 | 0 | Mutant | non-codel | Methylated   | No combined CNA             | WT     |
| TCGA.IK.S126 | 26 | Male   | 3.918090413  | 2.791723334 | diploid   | Oligoastrocytoma  | III | Anaplastic oligodendroglioma, IDH-mutant | CodeL            | NE | 432  | 14.4 | 0 | Mutant | non-codel | Methylated   | No combined CNA             | WT     |
| TCGA.KT.A7W1 | 45 | Female | 3.463334726  | 3.493570484 | Gain      | Astrocytoma       | III | Anaplastic astrocytoma, IDH-wildtype     | Classic-like     | CL | 432  | 14.4 | 0 | WT     | non-codel | Methylated   | Gain chr 7 amp; loss chr 10 | WT     |
| TCGA.P5.A5ET | 27 | Male   | 1.521804562  | 4.550703896 | diploid   | Oligodendroglioma | II  | Oligodendroglioma, IDH-mutant and 1p/19  | CodeL            | PN | -9   | -0.3 | 0 | Mutant | non-codel | Methylated   | No combined CNA             | WT     |
| TCGA.P5.A5EU | 35 | Male   | 4.919111216  | 6.862926178 | diploid   | Astrocytoma       | III | Anaplastic astrocytoma, IDH-mutant       | G-CIMP-low       | PN | 0    | 0    | 0 | Mutant | non-codel | Unmethylated | No combined CNA             | Mutant |
| TCGA.P5.A5EV | 39 | Male   | 3.096177502  | 3.866995128 | Gain      | Astrocytoma       | II  | Diffuse astrocytoma, IDH-mutant          | G-CIMP-high      | PN | 6    | 0.2  | 0 | Mutant | non-codel | Methylated   | No combined CNA             | Mutant |
| TCGA.P5.A5EW | 20 | Female | 2.337397118  | 3.185606043 | diploid</ |                   |     |                                          |                  |    |      |      |   |        |           |              |                             |        |

|              |    |        |              |             |         |                  |     |                                         |                  |    |        |           |        |           |              |                 |                             |            |                 |        |
|--------------|----|--------|--------------|-------------|---------|------------------|-----|-----------------------------------------|------------------|----|--------|-----------|--------|-----------|--------------|-----------------|-----------------------------|------------|-----------------|--------|
| TCGA.P5.A737 | 47 | Male   | 2.441536597  | 3.285076651 | diploid | Oligoastrocytoma | II  | Oligodendrogloma, IDH-mutant and 1p/19  | CodeL            | PN | 366    | 12.2      | 0      | Mutant    | codeL        | Methylated      | No combined CNA             | WT         |                 |        |
| TCGA.P5.A77W | 37 | Female | 1.69968488   | 2.77822696  | diploid | Oligoastrocytoma | III | Anaplastic oligodendrogloma, IDH-mutant | CodeL            | PN | 576    | 10.5      | 0      | Mutant    | codeL        | Methylated      | No combined CNA             | WT         |                 |        |
| TCGA.P5.A77X | 55 | Female | 1.746441765  | 5.015452966 | diploid | Oligoastrocytoma | II  | Oligodendrogloma, IDH-mutant and 1p/19  | CodeL            | NE | 1075   | 3.2       | 0      | Mutant    | codeL        | Methylated      | No combined CNA             | WT         |                 |        |
| TCGA.P5.A780 | 44 | Female | 1.857025515  | 3.414133553 | diploid | Astrocytoma      | III | Anaplastic astrocytoma, IDH-mutant      | G-CIMP-high      | PN | 72     | 2.4       | 0      | Mutant    | non-codeL    | Methylated      | No combined CNA             | WT         |                 |        |
| TCGA.P5.A781 | 34 | Female | 2.309496363  | 4.478382962 | diploid | Astrocytoma      | II  | Anaplastic astrocytoma, IDH-mutant      | CodeL            | NE | 132    | 4.4       | 0      | Mutant    | codeL        | Methylated      | No combined CNA             | WT         |                 |        |
| TCGA.QH.A65R | 38 | Female | 0.802234584  | 4.507084215 | diploid | Oligodendrogloma | III | Anaplastic oligodendrogloma, IDH-mutant | CodeL            | PN | 456    | 15.2      | 0      | Mutant    | codeL        | Methylated      | No combined CNA             | WT         |                 |        |
| TCGA.QH.A65S | 32 | Female | 3.079958315  | 2.800910251 | diploid | Oligoastrocytoma | II  | Diffuse astrocytoma, IDH-mutant         | G-CIMP-high      | PN | 75     | 2.5       | 0      | Mutant    | non-codeL    | Methylated      | No combined CNA             | Mutant     |                 |        |
| TCGA.QH.A65V | 43 | Female | 2.932193488  | 4.723045172 | diploid | Oligodendrogloma | II  | Oligodendrogloma, IDH-mutant and 1p/19  | CodeL            | NE | 378    | 12.6      | 0      | Mutant    | codeL        | Methylated      | No combined CNA             | WT         |                 |        |
| TCGA.QH.A65X | 28 | Female | 3.533052459  | 4.031148138 | diploid | Oligoastrocytoma | III | Anaplastic oligodendrogloma, IDH-mutant | CodeL            | PN | 474    | 15.8      | 0      | Mutant    | codeL        | Methylated      | No combined CNA             | WT         |                 |        |
| TCGA.QH.A65Z | 54 | Male   | 0.857423709  | 3.575895763 | diploid | Oligodendrogloma | III | Oligodendrogloma, IDH-mutant and 1p/19  | CodeL            | PN | 378    | 14        | 0      | Mutant    | codeL        | Methylated      | No combined CNA             | WT         |                 |        |
| TCGA.QH.A6CS | 41 | Male   | 3.834761772  | 6.113292611 | Gain    | Astrocytoma      | III | Anaplastic astrocytoma, IDH-wildtype    | PA-like          | 0  | WT     | non-codeL | 0      | WT        | non-codeL    | Unmethylated    | Gain chr 7 amp; loss chr 10 | WT         |                 |        |
| TCGA.QH.A6CU | 52 | Female | 3.671587777  | 4.760806423 | Gain    | Oligodendrogloma | III | Anaplastic oligodendrogloma, IDH-mutant | CodeL            | 0  | Mutant | codeL     | 444    | 14.8      | 0            | Mutant          | codeL                       | Methylated | No combined CNA | WT     |
| TCGA.QH.A6CV | 51 | Male   | 4.81275491   | 6.869318695 | Gain    | Oligoastrocytoma | III | Anaplastic astrocytoma, IDH-wildtype    | Classic-like     | CL | 435    | 14.5      | 0      | WT        | non-codeL    | Unmethylated    | Gain chr 7 amp; loss chr 10 | WT         |                 |        |
| TCGA.QH.A6CW | 43 | Male   | 2.184756353  | 3.280362249 | diploid | Oligoastrocytoma | III | Anaplastic astrocytoma, IDH-mutant      | G-CIMP-high      | PN | 408    | 13.6      | 0      | Mutant    | non-codeL    | Methylated      | No combined CNA             | Mutant     |                 |        |
| TCGA.QH.A6CX | 66 | Male   | 5.066390618  | 4.030636241 | Gain    | Astrocytoma      | II  | Diffuse astrocytoma, IDH-wildtype       | Mesenchymal-like | CL | 66     | 12.2      | 1      | WT        | non-codeL    | Unmethylated    | No combined CNA             | WT         |                 |        |
| TCGA.QH.A6CY | 38 | Male   | 2.272351716  | 4.751447653 | diploid | Oligoastrocytoma | III | Anaplastic oligodendrogloma, IDH-mutant | CodeL            | NE | 366    | 2.2       | 0      | Mutant    | codeL        | Methylated      | No combined CNA             | WT         |                 |        |
| TCGA.QH.A6CZ | 38 | Male   | 2.165333137  | 4.295069109 | diploid | Oligoastrocytoma | II  | Oligodendrogloma, IDH-mutant and 1p/19  | CodeL            | PN | 276    | 9.2       | 0      | Mutant    | codeL        | Methylated      | No combined CNA             | WT         |                 |        |
| TCGA.QH.A6X3 | 27 | Male   | 1.613908779  | 2.965525731 | Gain    | Oligoastrocytoma | II  | Diffuse astrocytoma, IDH-mutant         | G-CIMP-high      | PN | 309    | 10.3      | 0      | Mutant    | non-codeL    | Methylated      | No combined CNA             | Mutant     |                 |        |
| TCGA.QH.A6X4 | 47 | Male   | 3.096801582  | 4.025081964 | diploid | Oligoastrocytoma | III | Anaplastic oligodendrogloma, IDH-mutant | CodeL            | PN | 435    | 14.5      | 0      | Mutant    | codeL        | Methylated      | No combined CNA             | WT         |                 |        |
| TCGA.QH.A6X5 | 58 | Female | 2.265916914  | 2.630754919 | diploid | Oligoastrocytoma | II  | Oligodendrogloma, IDH-mutant and 1p/19  | CodeL            | PN | 489    | 16.3      | 0      | Mutant    | codeL        | Methylated      | No combined CNA             | WT         |                 |        |
| TCGA.QH.A6X8 | 56 | Female | 3.586956629  | 2.653662238 | diploid | Oligodendrogloma | III | Anaplastic oligodendrogloma, IDH-mutant | CodeL            | PN | 501    | 16.7      | 0      | Mutant    | codeL        | Methylated      | No combined CNA             | WT         |                 |        |
| TCGA.QH.A6X9 | 73 | Female | 1.714663152  | 4.144209561 | Gain    | Oligodendrogloma | II  | Oligodendrogloma, NOS                   | G-CIMP-high      | PN | 57     | 1.9       | 0      | Mutant    | non-codeL    | Methylated      | No combined CNA             | Mutant     |                 |        |
| TCGA.QH.A6XA | 23 | Female | 1.857505557  | 3.439898948 | Gain    | Oligoastrocytoma | II  | Diffuse astrocytoma, IDH-mutant         | G-CIMP-high      | PN | 495    | 16.5      | 0      | Mutant    | non-codeL    | Methylated      | No combined CNA             | Mutant     |                 |        |
| TCGA.QH.A6XC | 33 | Male   | 3.392323711  | 5.495202744 | Gain    | Astrocytoma      | III | Anaplastic astrocytoma, IDH-wildtype    | Classic-like     | CL | 330    | 5.7       | 0      | WT        | non-codeL    | Unmethylated    | Gain chr 7 amp; loss chr 10 | WT         |                 |        |
| TCGA.QH.A6XE | 33 | Male   | 2.036905384  | 4.117175767 | diploid | Oligodendrogloma | III | Oligodendrogloma, IDH-mutant and 1p/19  | CodeL            | 0  | Mutant | codeL     | 333    | 11.1      | 0            | Mutant          | codeL                       | Methylated | No combined CNA | WT     |
| TCGA.QH.A870 | 38 | Female | 2.008702008  | 3.175205209 | Gain    | Oligoastrocytoma | III | Anaplastic astrocytoma, IDH-mutant      | G-CIMP-high      | PN | 390    | 13        | 0      | Mutant    | non-codeL    | Methylated      | No combined CNA             | Mutant     |                 |        |
| TCGA.R8.A6MK | 40 | Male   | 2.697240048  | 3.905081284 | diploid | Oligodendrogloma | II  | Oligodendrogloma, IDH-mutant and 1p/19  | CodeL            | 0  | Mutant | codeL     | 2684   | 88.8      | 0            | Mutant          | codeL                       | Methylated | No combined CNA | WT     |
| TCGA.R8.A6ML | 52 | Male   | 0.691891445  | 3.836621006 | diploid | Oligodendrogloma | III | Anaplastic oligodendrogloma, IDH-mutant | CodeL            | PN | 2820   | 94        | 0      | Mutant    | codeL        | Methylated      | No combined CNA             | WT         |                 |        |
| TCGA.R8.A6MO | 53 | Female | 3.831076648  | 2.051928885 | diploid | Oligodendrogloma | II  | Oligodendrogloma, IDH-mutant and 1p/19  | CodeL            | PN | 978    | 32.6      | 0      | Mutant    | codeL        | Methylated      | No combined CNA             | WT         |                 |        |
| TCGA.R8.A6YH | NA | NA     | 2.86985167   | 3.546005424 | diploid | Astrocytoma      | NA  | NA                                      | G-CIMP-high      | PN | 0      | 0         | Mutant | non-codeL | Unmethylated | No combined CNA | Mutant                      |            |                 |        |
| TCGA.R8.A73M | 48 | Female | 1.420886575  | 5.243219692 | diploid | Oligodendrogloma | II  | Oligodendrogloma, IDH-mutant and 1p/19  | CodeL            | PN | 1782   | 59.4      | 0      | Mutant    | codeL        | Methylated      | No combined CNA             | WT         |                 |        |
| TCGA.RY.A83X | 46 | Female | 2.457804391  | 2.984425295 | diploid | Oligodendrogloma | II  | Oligodendrogloma, IDH-mutant and 1p/19  | CodeL            | 0  | Mutant | codeL     | 927    | 30.9      | 0            | Mutant          | codeL                       | Methylated | No combined CNA | WT     |
| TCGA.RY.A83Y | 45 | Male   | 3.142250043  | 3.4668881   | diploid | Oligodendrogloma | II  | Oligodendrogloma, IDH-mutant and 1p/19  | CodeL            | 0  | Mutant | codeL     | 165    | 5.5       | 0            | Mutant          | codeL                       | Methylated | No combined CNA | WT     |
| TCGA.RY.A83Z | 54 | Female | 3.648891056  | 4.309620048 | diploid | Astrocytoma      | III | Anaplastic astrocytoma, IDH-mutant      | G-CIMP-low       | PN | 297    | 9.9       | 0      | Mutant    | non-codeL    | Methylated      | No combined CNA             | Mutant     |                 |        |
| TCGA.RY.A840 | 47 | Male   | 2.34848739   | 1.222186307 | diploid | Oligodendrogloma | III | Anaplastic oligodendrogloma, IDH-mutant | CodeL            | 0  | Mutant | codeL     | 843    | 28.1      | 0            | Mutant          | codeL                       | Methylated | No combined CNA | WT     |
| TCGA.RY.A843 | 30 | Male   | 3.098369023  | 4.440267885 | diploid | Astrocytoma      | III | Anaplastic astrocytoma, IDH-mutant      | G-CIMP-high      | PN | 63     | 2.1       | 0      | Mutant    | non-codeL    | Methylated      | No combined CNA             | WT         |                 |        |
| TCGA.RY.A845 | 40 | Female | 3.072363095  | 3.640158155 | Gain    | Oligoastrocytoma | II  | Diffuse astrocytoma, IDH-mutant         | G-CIMP-high      | PN | 589    | 19.6      | 0      | Mutant    | non-codeL    | Methylated      | No combined CNA             | WT         |                 |        |
| TCGA.RY.A847 | 45 | Male   | 3.892343716  | 4.638923744 | diploid | Oligodendrogloma | II  | Oligodendrogloma, IDH-mutant and 1p/19  | CodeL            | 0  | Mutant | codeL     | 3016   | 98.2      | 1            | Mutant          | non-codeL                   | Methylated | No combined CNA | Mutant |
| TCGA.S9.A6TS | 48 | Female | 3.150137204  | 4.212063451 | NA      | Astrocytoma      | III | Anaplastic astrocytoma, IDH-mutant      | G-CIMP-high      | NE | 1866   | 62.2      | 0      | Mutant    | non-codeL    | Methylated      | No combined CNA             | Mutant     |                 |        |
| TCGA.S9.A8T5 | 38 | Male   | 2.834286474  | 3.50351789  | diploid | Astrocytoma      | II  | Diffuse astrocytoma, IDH-mutant         | G-CIMP-high      | PN | 2613   | 87.1      | 1      | Mutant    | non-codeL    | Methylated      | No combined CNA             | WT         |                 |        |
| TCGA.S9.A8T7 | 50 | Male   | 4.17270352   | 4.169812384 | diploid | Oligoastrocytoma | III | Anaplastic astrocytoma, IDH-mutant      | G-CIMP-high      | ME | 564    | 18.8      | 0      | Mutant    | non-codeL    | Methylated      | No combined CNA             | Mutant     |                 |        |
| TCGA.S9.A8TW | 40 | Male   | -0.012315322 | 2.665279061 | diploid | Oligodendrogloma | III | Anaplastic oligodendrogloma, IDH-mutant | CodeL            | 0  | Mutant | codeL     | 1233   | 41.1      | 0            | Mutant          | codeL                       | Methylated | No combined CNA | WT     |
| TCGA.S9.A8TX | 46 | Male   | 2.065916918  | 3.640447406 | diploid | Oligodendrogloma | III | Anaplastic oligodendrogloma, IDH-mutant | CodeL            | PN | 843    | 28.1      | 0      | Mutant    | codeL        | Methylated      | No combined CNA             | WT         |                 |        |
| TCGA.S9.A8TY | 50 | Male   | 0.392097567  | 4.151412369 | Gain    | Oligodendrogloma | II  | Oligodendrogloma, IDH-mutant and 1p/19  | CodeL            | PN | 1062   | 35.4      | 0      | Mutant    | codeL        | Methylated      | No combined CNA             | WT         |                 |        |
| TCGA.S9.A8TZ | 39 | Female | 2.440890599  | 3.834034709 | diploid | Astrocytoma      | II  | Diffuse astrocytoma, IDH-mutant         | G-CIMP-high      | PN | 1104   | 36.8      | 0      | Mutant    | non-codeL    | Methylated      | No combined CNA             | WT         |                 |        |
| TCGA.S9.A8U0 | 46 | Male   | 4.228987957  | 4.802213901 | Gain    | Astrocytoma      | III | Anaplastic astrocytoma, IDH-wildtype    | Mesenchymal-like | ME | 732    | 24.4      | 1      | WT        | non-codeL    | Unmethylated    | Gain chr 7 amp; loss chr 10 | WT         |                 |        |
| TCGA.S9.A8U1 | 22 | Female | 3.14891784   | 2.468296574 | diploid | Astrocytoma      | II  | Anaplastic astrocytoma, IDH-mutant      | G-CIMP-high      | PN | 774    | 25.8      | 0      | Mutant    | non-codeL    | Methylated      | No combined CNA             | Mutant     |                 |        |
| TCGA.S9.A8U2 | 48 | Female | 2.250749397  | 2.944539894 | diploid | Oligodendrogloma | II  | Oligodendrogloma, IDH-mutant and 1p/19  | CodeL            | PN | 897    | 29.9      | 0      | Mutant    | codeL        | Methylated      | No combined CNA             | WT         |                 |        |
| TCGA.S9.A8U5 | 33 | Male   | 3.670874319  | 3.655981439 | diploid | Astrocytoma      | II  | Diffuse astrocytoma, IDH-mutant         | CodeL            | PN | 978    | 32.6      | 0      | Mutant    | codeL        | Methylated      | No combined CNA             | WT         |                 |        |
| TCGA.S9.A8U6 | 28 | Male   | 3.02185279   | 4.473462236 | diploid | Astrocytoma      | III | Anaplastic astrocytoma, IDH-mutant      | G-CIMP-high      | NE | 1053   | 35.1      | 0      | Mutant    | non-codeL    | Methylated      | No combined CNA             | Mutant     |                 |        |
| TCGA.S9.A8U8 | 24 | Male   | 4.357052253  | 3.469202874 | diploid | Astrocytoma      | II  | Diffuse astrocytoma, IDH-mutant         | G-CIMP-high      | PN | 2946   | 98.2      | 1      | Mutant    | non-codeL    | Methylated      | No combined CNA             | Mutant     |                 |        |
| TCGA.S9.A8U9 | 36 | Male   | 3.197660985  | 4.369170751 | diploid | Astrocytoma      | III | Anaplastic astrocytoma, IDH-mutant      | G-CIMP-high      | PN | 2877   | 95.9      | 0      | Mutant    | non-codeL    | Methylated      | No combined CNA             | WT         |                 |        |
| TCGA.S9.A8UA | 66 | Male   | 3.708893509  | 4.454804486 | diploid | Oligoastrocytoma | III | Anaplastic astrocytoma, IDH-wildtype    | PA-like          | ME | 174    | 5.8       | 1      | WT        | non-codeL    | Unmethylated    | No combined CNA             | Mutant     |                 |        |
| TCGA.S9.A8UB | 52 | Male   | 0.855705557  | 3.683763816 | diploid | Oligodendrogloma | II  | Oligodendrogloma, IDH-mutant and 1p/19  | CodeL            | PN | 3711   | 123.7     | 0      | Mutant    | codeL        | Methylated      | No combined CNA             | WT         |                 |        |
| TCGA.S9.A8VD | 58 | Male   | 2.545671894  | 3.813586254 | diploid | Oligodendrogloma | II  | Anaplastic oligodendrogloma, IDH-mutant | CodeL            | PN | 2256   | 75.2      | 0      | Mutant    | codeL        | Methylated      | No combined CNA             | WT         |                 |        |
| TCGA.S9.A8WE | 34 | Male   | 2.444932049  | 2.972692654 | diploid | Oligodendrogloma | II  | Oligodendrogloma, IDH-mutant and 1p/19  | CodeL            | PN | 4056   | 135.2     | 0      | Mutant    | codeL        | Methylated      | No combined CNA             | WT         |                 |        |
| TCGA.S9.A8WG | 31 | Male   | 3.619154735  | 5.619098964 | diploid | Astrocytoma      | III | Anaplastic astrocytoma, IDH-mutant      | G-CIMP-high      | ME | 2565   | 85.5      | 0      | Mutant    | non-codeL    | Methylated      | No combined CNA             | Mutant     |                 |        |
| TCGA.S9.A8WH | 73 | Female | 1.360027093  | 2.660660049 | diploid | Oligoastrocytoma | II  | Oligodendrogloma, IDH-mutant and 1p/19  | CodeL            | PN | 1158   | 38.6      | 0      | Mutant    | codeL        | Methylated      | No combined CNA             | WT         |                 |        |
| TCGA.S9.A8WI | 56 | Female | 2.224626867  | 6.516330387 | diploid | Oligoastrocytoma | II  | Diffuse astrocytoma, IDH-mutant         | G-CIMP-high      | NE | 2550   | 85        | 0      | Mutant    | non-codeL    | Methylated      | No combined CNA             | WT         |                 |        |
| TCGA.S9.A8WL | 52 | Male   | 2.448742405  | 4.822949339 | diploid | Astrocytoma      | III | Anaplastic astrocytoma, IDH-mutant      | CodeL            | NE | 933    | 31.1      | 0      | Mutant    | codeL        | Methylated      | No combined CNA             | WT         |                 |        |
| TCGA.S9.A8WM | 59 | Female | 3.100960833  | 6.539974556 | Gain    | Astrocytoma      | III | Anaplastic astrocytoma, IDH-wildtype    | Mesenchymal-like | CL | 597    | 19.9      | 0      | WT        | non-codeL    | Unmethylated    | Gain chr 7 amp; loss chr 10 | WT         |                 |        |
| TCGA.S9.A8WN | 38 | Female | 4.456924398  | 2.30873947  | diploid | Astrocytoma      | III | Anaplastic astrocytoma, IDH-mutant      | CodeL            | ME | 774    | 26.5      | 0      | Mutant    | codeL        | Methylated      | No combined CNA             | WT         |                 |        |
| TCGA.S9.A8W0 | 29 | Male   | 1.912611546  | 3.272082927 | Gain    | Astrocytoma      | II  | Diffuse astrocytoma, IDH-mutant         | G-CIMP-high      | PN | 598    | 18.6      | 0      | Mutant    | non-codeL    | Methylated      | No combined CNA             | Mutant     |                 |        |
| TCGA.S9.A8WP | 42 | Male   | 2.682011391  | 3.699651569 | diploid | Oligoastrocytoma | III | Anaplastic oligodendrogloma, IDH-mutant | CodeL            | PN | 558    | 18.6      | 0      | Mutant    | codeL        | Methylated      | No combined CNA             | WT         |                 |        |
| TCGA.S9.A8WQ | 57 | Female | 3.922026542  | 3.38727915  | diploid | Oligoastrocytoma | II  | Diffuse astrocytoma, IDH-mutant         | G-CIMP-high      | PN | 423    | 14.1      | 0      | Mutant    | non-codeL    | Methylated      | No combined CNA             | Mutant     |                 |        |
| TCGA.S9.A8WR | 45 | Female | 1.96494216   | 5.481444293 | Gain    | Oligoastrocytoma | III | Oligodendrogloma, IDH-mutant and 1p/19  | CodeL            | NE | 1063   | 36.1      | 0      | Mutant    | codeL        | Methylated      | No combined CNA             | WT         |                 |        |
| TCGA.S9.A71X | 33 | Female | 3.079241559  | 3.31605883  | diploid | Astrocytoma      | III | Anaplastic astrocytoma, IDH-mutant      | G-CIMP-low       | PN | 237    | 7.9       | 1      | Mutant    | non-codeL    | Unmethylated    | No combined CNA             | Mutant     |                 |        |
| TCGA.S9.A71X | 57 | Male   | 3.525079124  | 4.980500635 | Gain    | Astrocytoma      | III | Anaplastic astrocytoma, IDH-wildtype    | Mesenchymal-like | CL | 807    | 26.9      | 1      | WT        | non-codeL    | Unmethylated    | Gain chr 7 amp; loss chr 10 | WT         |                 |        |
| TCGA.S9.A71Y | 39 | Male   | 3.492840203  | 3.192762292 | diploid | Oligoastrocytoma | III | Anaplastic oligodendrogloma, IDH-mutant | CodeL            | 0  | Mutant | codeL     | 705    | 23.5      | 0            | Mutant          | codeL                       | Methylated | No combined CNA | WT     |
| TCGA.S9.A71Z | 48 | Female | 2.71918344   | 4.717446508 | Gain    | Astrocytoma      | II  | Anaplastic astrocytoma, IDH-mutant      | G-CIMP-high      | NE | 600    | 20        |        |           |              |                 |                             |            |                 |        |

|              |    |        |             |             |         |                   |     |                                          |                  |    |      |      |   |        |         |              |                             |        |
|--------------|----|--------|-------------|-------------|---------|-------------------|-----|------------------------------------------|------------------|----|------|------|---|--------|---------|--------------|-----------------------------|--------|
| TCGA.TM.A7C5 | 30 | Male   | 1.488926268 | 4.556637865 | diploid | Oligoastrocytoma  | II  | Oligodendroglioma, IDH-mutant and 1p/19  | Code             | PN | 1479 | 49.3 | 0 | Mutant | cod     | Methylated   | No combined CNA             | WT     |
| TCGA.TM.A7CA | 44 | Male   | 1.522758841 | 4.064736299 | Gain    | Astrocytoma       | II  | Diffuse astrocytoma, IDH-mutant          | G-CIMP-high      | PN | 1044 | 34.8 | 0 | Mutant | non-cod | Methylated   | No combined CNA             | Mutant |
| TCGA.TM.A7CF | 41 | Female | 3.996054248 | 5.880465018 | diploid | Astrocytoma       | II  | Diffuse astrocytoma, IDH-mutant          | G-CIMP-high      | NE | 1962 | 65.4 | 0 | Mutant | non-cod | Methylated   | No combined CNA             | WT     |
| TCGA.TM.A84B | 40 | Male   | 1.931872127 | 5.262662413 | Gain    | Astrocytoma       | III | Anaplastic astrocytoma, IDH-wildtype     | Mesenchymal-like |    | 747  | 24.9 | 1 | WT     | non-cod | Unmethylated | Gain chr 7 amp; loss chr 10 | WT     |
| TCGA.TM.A84C | 32 | Male   | 2.117960953 | 1.814263291 | diploid | Astrocytoma       | II  | Diffuse astrocytoma, IDH-wildtype        | PA-like          |    | 486  | 16.2 | 1 | WT     | non-cod | Unmethylated | No combined CNA             | WT     |
| TCGA.TM.A84F | 48 | Male   | 5.853950749 | 5.128969712 | diploid | Astrocytoma       | II  | Anaplastic astrocytoma, IDH-mutant       | G-CIMP-high      |    | 1770 | 59   | 0 | Mutant | non-cod | Methylated   | No combined CNA             | WT     |
| TCGA.TM.A84G | 54 | Female | 1.259844931 | 2.784252693 | diploid | Oligodendroglioma | III | Anaplastic oligodendroglioma, IDH-mutant | G-CIMP-high      |    | 1218 | 40.6 | 0 | Mutant | cod     | Methylated   | No combined CNA             | WT     |
| TCGA.TM.A84H | 44 | Female | 0.667301759 | 5.486534186 | Gain    | Oligoastrocytoma  | III | Anaplastic astrocytoma, IDH-mutant       | G-CIMP-high      |    | 912  | 30.4 | 0 | Mutant | non-cod | Methylated   | No combined CNA             | Mutant |
| TCGA.TM.A84I | 30 | Male   | 3.295950434 | 3.896736756 | diploid | Astrocytoma       | III | Anaplastic astrocytoma, IDH-mutant       | G-CIMP-low       |    | 843  | 28.1 | 0 | Mutant | non-cod | Methylated   | No combined CNA             | Mutant |
| TCGA.TM.A84J | 63 | Male   | 2.842978852 | 7.587251992 | diploid | Oligodendroglioma | III | Anaplastic oligodendroglioma, NOS        | PA-like          |    | 726  | 24.2 | 0 | WT     | non-cod | Unmethylated | No combined CNA             | WT     |
| TCGA.TM.A84L | 31 | Male   | 3.649385529 | 3.661521596 | diploid | Oligoastrocytoma  | II  | Diffuse astrocytoma, IDH-mutant          | G-CIMP-high      |    | 1224 | 40.8 | 1 | Mutant | non-cod | Methylated   | No combined CNA             | Mutant |
| TCGA.TM.A84M | 40 | Male   | 1.361038407 | 3.567679295 | Gain    | Oligodendroglioma | III | Anaplastic oligodendroglioma, IDH-mutant | G-CIMP-high      |    | 744  | 24.8 | 0 | Mutant | cod     | Methylated   | No combined CNA             | WT     |
| TCGA.TM.A84O | 61 | Female | 4.296589557 | 3.266711594 | diploid | Oligodendroglioma | III | Anaplastic oligodendroglioma, IDH-mutant | G-CIMP-high      |    | 996  | 33.2 | 1 | Mutant | cod     | Methylated   | No combined CNA             | WT     |
| TCGA.TM.A84Q | 31 | Male   | 2.963344646 | 3.712254599 | diploid | Astrocytoma       | II  | Diffuse astrocytoma, IDH-mutant          | G-CIMP-high      |    | 762  | 25.4 | 0 | Mutant | non-cod | Methylated   | No combined CNA             | Mutant |
| TCGA.TM.A84R | 46 | Male   | 0.767400556 | 6.038554704 | diploid | Oligodendroglioma | II  | Oligodendroglioma, IDH-mutant and 1p/19  | Code             |    | 558  | 18.6 | 0 | Mutant | cod     | Methylated   | No combined CNA             | WT     |
| TCGA.TM.A84S | 36 | Male   | 2.867975514 | 3.282706309 | diploid | Oligodendroglioma | III | Anaplastic oligodendroglioma, IDH-mutant | Code             |    | 447  | 14.9 | 0 | Mutant | cod     | Methylated   | No combined CNA             | WT     |
| TCGA.TM.A84T | 19 | Male   | 3.41945799  | 3.142576814 | diploid | Oligoastrocytoma  | II  | Diffuse astrocytoma, IDH-mutant          | G-CIMP-high      |    | 714  | 23.8 | 0 | Mutant | non-cod | Methylated   | No combined CNA             | Mutant |
| TCGA.TQ.A7RF | 27 | Female | 3.108139687 | 3.306743447 | diploid | Oligodendroglioma | III | Anaplastic oligodendroglioma, NOS        | G-CIMP-high      |    | 642  | 21.4 | 0 | Mutant | non-cod | Unmethylated | No combined CNA             | WT     |
| TCGA.TQ.A7RG | 36 | Male   | 1.303225478 | 2.754395833 | diploid | Oligoastrocytoma  | II  | Oligodendroglioma, IDH-mutant and 1p/19  | Code             | PN | 591  | 19.7 | 0 | Mutant | cod     | Methylated   | No combined CNA             | WT     |
| TCGA.TQ.A7RH | 39 | Male   | 3.380216879 | 4.828174575 | Gain    | Oligoastrocytoma  | II  | Diffuse astrocytoma, IDH-mutant          | G-CIMP-high      |    | 480  | 16   | 0 | Mutant | non-cod | Methylated   | No combined CNA             | Mutant |
| TCGA.TQ.A7RI | 37 | Female | 3.274723846 | 3.160904058 | Gain    | Oligodendroglioma | II  | Oligodendroglioma, IDH-mutant and 1p/19  | Code             | PN | 60   | 2    | 0 | Mutant | cod     | Methylated   | No combined CNA             | WT     |
| TCGA.TQ.A7RJ | 25 | Female | 3.598377117 | 4.029338031 | diploid | Oligoastrocytoma  | II  | Diffuse astrocytoma, IDH-mutant          | G-CIMP-high      |    | 1212 | 40.4 | 0 | Mutant | non-cod | Methylated   | No combined CNA             | Mutant |
| TCGA.TQ.A7RK | 29 | Male   | 2.525693061 | 3.576884882 | diploid | Oligoastrocytoma  | II  | Diffuse astrocytoma, IDH-mutant          | G-CIMP-high      | PN | 1323 | 44.1 | 0 | Mutant | non-cod | Methylated   | No combined CNA             | Mutant |
| TCGA.TQ.A7RM | 41 | Female | 1.341245714 | 3.75084229  | Gain    | Oligoastrocytoma  | III | Anaplastic astrocytoma, IDH-mutant       | G-CIMP-high      | PN | 1101 | 36.7 | 0 | Mutant | non-cod | Methylated   | Gain chr 7 amp; loss chr 10 | WT     |
| TCGA.TQ.A7RN | 32 | Male   | 1.051720116 | 4.217137636 | diploid | Oligodendroglioma | II  | Oligodendroglioma, IDH-mutant and 1p/19  | Code             |    | 1011 | 33.7 | 0 | Mutant | cod     | Methylated   | No combined CNA             | WT     |
| TCGA.TQ.A7RO | 29 | Male   | 2.328094886 | 4.489819066 | diploid | Oligoastrocytoma  | II  | Oligodendroglioma, IDH-mutant and 1p/19  | Code             | PN | 936  | 31.2 | 0 | Mutant | cod     | Methylated   | No combined CNA             | WT     |
| TCGA.TQ.A7RP | 66 | Male   | 3.21549223  | 3.64178877  | Gain    | Oligoastrocytoma  | II  | Diffuse astrocytoma, IDH-wildtype        | Mesenchymal-like | NE | 903  | 30.1 | 0 | WT     | non-cod | Methylated   | No combined CNA             | WT     |
| TCGA.TQ.A7RQ | 38 | Female | 0.854394678 | 4.396604781 | diploid | Oligodendroglioma | II  | Oligodendroglioma, IDH-mutant and 1p/19  | Code             | PN | 783  | 26.1 | 0 | Mutant | cod     | Methylated   | No combined CNA             | WT     |
| TCGA.TQ.A7RR | 38 | Male   | 3.369954977 | 4.389553046 | diploid | Oligoastrocytoma  | II  | Diffuse astrocytoma, IDH-mutant          | G-CIMP-high      | NE | 777  | 25.9 | 0 | Mutant | non-cod | Unmethylated | No combined CNA             | Mutant |
| TCGA.TQ.A7RS | 25 | Female | 1.25960393  | 3.827747904 | diploid | Oligodendroglioma | II  | Oligodendroglioma, IDH-mutant and 1p/19  | Code             | PN | 0    | 0    | 0 | Mutant | cod     | Methylated   | No combined CNA             | WT     |
| TCGA.TQ.A7RT | 51 | Male   | 1.600079412 | 4.073614609 | diploid | Oligodendroglioma | II  | Oligodendroglioma, IDH-mutant and 1p/19  | Code             | PN | 1017 | 33.9 | 0 | Mutant | cod     | Methylated   | No combined CNA             | WT     |
| TCGA.TQ.A7RV | 27 | Male   | 2.547474507 | 4.508105341 | diploid | Astrocytoma       | II  | Diffuse astrocytoma, IDH-mutant          | G-CIMP-high      | PN | 1842 | 61.4 | 0 | Mutant | non-cod | Methylated   | No combined CNA             | Mutant |
| TCGA.TQ.A7RW | 32 | Male   | 3.810833802 | 3.698351849 | diploid | Oligodendroglioma | II  | Oligodendroglioma, NOS                   | G-CIMP-high      | PN | 810  | 27   | 1 | Mutant | non-cod | Methylated   | No combined CNA             | WT     |
| TCGA.TQ.A7RX | 42 | Female | 2.290542363 | 4.925187674 | diploid | Oligodendroglioma | II  | Oligodendroglioma, NOS                   | G-CIMP-high      |    | 942  | 31.4 | 1 | Mutant | non-cod | Methylated   | No combined CNA             | WT     |
| TCGA.VM.A8C8 | 50 | Female | 3.221521389 | 3.451211112 | diploid | Oligodendroglioma | II  | Oligodendroglioma, NOS                   | G-CIMP-high      |    | 1290 | 43   | 0 | Mutant | non-cod | Unmethylated | No combined CNA             | Mutant |
| TCGA.VM.A8C9 | 37 | Female | 5.868965737 | 5.189875942 | diploid | Astrocytoma       | II  | Diffuse astrocytoma, IDH-wildtype        | PA-like          |    | 1296 | 43.2 | 0 | WT     | non-cod | Unmethylated | No combined CNA             | WT     |
| TCGA.VM.A8CA | 54 | Male   | 3.789499737 | 5.016350225 | diploid | Oligodendroglioma | II  | Oligodendroglioma, NOS                   | Code             |    | 405  | 13.5 | 0 | Mutant | non-cod | Methylated   | No combined CNA             | WT     |
| TCGA.VM.A8CB | 33 | Male   | 1.263627908 | 4.43594419  | diploid | Oligodendroglioma | III | Anaplastic oligodendroglioma, IDH-mutant | Code             |    | 3    | 0.1  | 0 | Mutant | cod     | Methylated   | No combined CNA             | WT     |
| TCGA.VM.A8CC | 58 | Male   | 4.349160013 | 4.03725921  | diploid | Astrocytoma       | III | Anaplastic astrocytoma, IDH-wildtype     | Mesenchymal-like |    | 237  | 7.9  | 1 | WT     | non-cod | Unmethylated | No combined CNA             | WT     |
| TCGA.VM.A8CD | 25 | Male   | 1.723427501 | 3.870197012 | diploid | Oligodendroglioma | II  | Oligodendroglioma, IDH-mutant and 1p/19  | Code             |    | 1176 | 39.2 | 0 | Mutant | cod     | Methylated   | No combined CNA             | WT     |
| TCGA.VM.A8CF | 44 | Female | 6.436340099 | 4.553102417 | diploid | Astrocytoma       | III | Anaplastic astrocytoma, IDH-mutant       | G-CIMP-high      |    | 600  | 20   | 0 | Mutant | non-cod | Methylated   | No combined CNA             | Mutant |
| TCGA.VM.A8CH | 24 | Female | 3.5627675   | 3.3950628   | diploid | Astrocytoma       | II  | Diffuse astrocytoma, IDH-mutant          | G-CIMP-high      |    | 705  | 23.5 | 0 | Mutant | non-cod | Unmethylated | No combined CNA             | Mutant |
| TCGA.VV.A829 | 44 | Male   | 2.894507369 | 2.781779346 | diploid | Oligoastrocytoma  | III | Anaplastic oligodendroglioma, IDH-mutant | Code             |    | 1110 | 37   | 0 | Mutant | cod     | Methylated   | No combined CNA             | WT     |
| TCGA.VV.A82M | 36 | Female | 2.847275379 | 3.191941593 | diploid | Astrocytoma       | II  | Anaplastic astrocytoma, IDH-mutant       | G-CIMP-high      |    | 480  | 16   | 0 | Mutant | non-cod | Methylated   | No combined CNA             | WT     |
| TCGA.VV.A7QS | 35 | Female | 1.279174108 | 3.329683339 | Gain    | Oligodendroglioma | III | Anaplastic oligodendroglioma, IDH-mutant | Code             |    | 243  | 23.2 | 0 | Mutant | cod     | Methylated   | No combined CNA             | WT     |
| TCGA.VV.A8FI | 66 | Male   | 4.707397788 | 4.316283342 | Gain    | Astrocytoma       | III | Anaplastic astrocytoma, IDH-wildtype     | Classic-like     |    | 696  | 8.1  | 1 | WT     | non-cod | Unmethylated | Gain chr 7 amp; loss chr 10 | WT     |
| TCGA.W9.A837 | 47 | Male   | 0.677801374 | 4.736518289 | diploid | Oligodendroglioma | II  | Oligodendroglioma, IDH-mutant and 1p/19  | Code             |    | 1533 | 51.1 | 0 | Mutant | cod     | Methylated   | No combined CNA             | WT     |
| TCGA.WH.A86K | 65 | Male   | 2.2347159   | 2.772751358 | diploid | Astrocytoma       | II  | Diffuse astrocytoma, IDH-mutant          | G-CIMP-high      |    | 399  | 13.3 | 0 | Mutant | non-cod | Methylated   | No combined CNA             | WT     |
| TCGA.WY.A858 | 32 | Female | 3.949646983 | 3.147420677 | diploid | Astrocytoma       | III | Anaplastic astrocytoma, IDH-mutant       | G-CIMP-high      |    | 1320 | 44   | 0 | Mutant | non-cod | Methylated   | No combined CNA             | Mutant |
| TCGA.WY.A859 | 34 | Female | 3.3492945   | 5.851609137 | diploid | Astrocytoma       | II  | Diffuse astrocytoma, IDH-mutant          | G-CIMP-high      |    | 1197 | 39.9 | 0 | Mutant | non-cod | Methylated   | No combined CNA             | WT     |
| TCGA.WY.A85A | 20 | Male   | 2.772751358 | 4.138544184 | diploid | Astrocytoma       | II  | Diffuse astrocytoma, IDH-mutant          | G-CIMP-high      |    | 1302 | 43.4 | 0 | Mutant | non-cod | Methylated   | No combined CNA             | Mutant |
| TCGA.WY.A85B | 24 | Male   | 3.493561644 | 3.85581142  | diploid | Astrocytoma       | II  | Diffuse astrocytoma, IDH-mutant          | G-CIMP-high      |    | 1374 | 45.8 | 0 | Mutant | non-cod | Methylated   | No combined CNA             | Mutant |
| TCGA.WY.A85C | 26 | Male   | 2.197425095 | 3.266861484 | diploid | Astrocytoma       | II  | Diffuse astrocytoma, IDH-mutant          | G-CIMP-high      |    | 1407 | 46.9 | 0 | Mutant | non-cod | Methylated   | No combined CNA             | WT     |
| TCGA.WY.A85D | 60 | Male   | 3.30287467  | 3.538451252 | diploid | Oligoastrocytoma  | II  | Diffuse astrocytoma, IDH-mutant          | G-CIMP-high      |    | 1131 | 37.7 | 0 | Mutant | non-cod | Unmethylated | No combined CNA             | Mutant |
| TCGA.WY.A85E | 48 | Female | 1.9644356   | 4.99796871  | Gain    | Oligoastrocytoma  | II  | Diffuse astrocytoma, IDH-mutant          | G-CIMP-high      |    | 624  | 20.8 | 0 | Mutant | non-cod | Methylated   | No combined CNA             | Mutant |

Table S3: Univariate and multivariable Cox regression analyses of factors associated with overall survival in glioma patients(n=610)

| Variable               | Univariate analysis |       | Multivariable analysis |       |
|------------------------|---------------------|-------|------------------------|-------|
|                        | HR (95% CI)         | P     | HR (95% CI)            | P     |
| Age                    | 5.57(4.11 to 7.55)  | <0.01 | 1.724(1.23 to 2.42)    | <0.01 |
| Gender                 | 0.96(0.72 to 1.27)  | 0.78  | \                      | \     |
| Grade                  | 5.01(3.97 to 6.31)  | <0.01 | 4.67(1.23 to 2.42)     | <0.01 |
| Histology              | 1.91(1.64 to 2.23)  | <0.01 | \                      | \     |
| Integrated diagnosis   | 1.47(1.37 to 1.57)  | <0.01 | 0.81(0.66 to 0.98)     | <0.05 |
| Subtype                | 1.61(1.48 to 1.72)  | <0.01 | \                      | \     |
| IDH.status             | 0.08(0.06 to 0.11)  | <0.01 | 0.19(0.13 to 0.30)     | <0.01 |
| Chr.1p/19q.codeletion  | 0.23(0.15 to 0.37)  | <0.01 | \                      | \     |
| MGMT.promoter.status   | 0.28(0.21 to 0.37)  | <0.01 | \                      | \     |
| Chr.7.gain/Chr.10.loss | 8.42(6.10 to 11.62) | <0.01 | \                      | \     |
| ATRX.status            | 0.45(0.33 to 0.63)  | <0.01 | \                      | \     |
| ATG9B expression       | 2.34(1.75 to 3.13)  | <0.01 | \                      | \     |
| ATG9B CNV              | 3.50(2.61 to 4.70)  | <0.01 | \                      | \     |

Table S4: the clinicopathologic information of patients whose samples were used in Figure S6.

| Sample ID | Pathology ID | Diagnosis                    | Grade |
|-----------|--------------|------------------------------|-------|
| II-1      | B201614427   | Astrocytoma                  | II    |
| II-2      | B201612108   | Astrocytoma                  | II    |
| II-3      | B201617117   | Oligodendroglioma            | II    |
| III-1     | B201612262   | Anaplastic astrocytoma       | III   |
| III-2     | B201612197   | Anaplastic oligodendroglioma | III   |
| III-3     | B201700698   | Anaplastic oligoastrocytoma  | III   |
| III-4     | B201610023   | Anaplastic astrocytoma       | III   |
| IV-1      | B201616230   | Glioblastoma                 | IV    |
| IV-2      | B201510156   | Glioblastoma                 | IV    |
| IV-3      | B201701054   | Glioblastoma                 | IV    |
| IV-4      | B201612296   | Glioblastoma                 | IV    |
| IV-5      | B201611388   | Glioblastoma                 | IV    |

Table S5: the primers of indicated genes

| Gene Name | Forward Primer        | Reverse Primer           |
|-----------|-----------------------|--------------------------|
| ASCL2     | GCAGGAGAAACAGGGCCTAC  | GCTGAGGGAAGTCTTGGAGC     |
| ATG9B     | CCCCTCATACAAGAAGCTCCC | TGCAGGTTGAGCCTGTGTTG     |
| NES       | CTGCTACCCTTGAGACACCTG | GGGCTCTGATCTCTGCATCTAC   |
| PROM1     | AGTCGGAAACTGGCAGATAGC | GGTAGTGTTGTACTIONGGCCAAT |
| GAPDH     | GGAGCGAGATCCCTCCAAAAT | GGCTGTTGTCATACTTCTCATGG  |

Table S6: Primary antibodies information list

| Primary antibodies | Company                   | Cat.NO     | Isotype | Application | Dilution Ratio |
|--------------------|---------------------------|------------|---------|-------------|----------------|
| ASCL2              | Millipore                 | #MAB4418   | Mouse   | CHIP        | 1:200          |
| ASCL2              | R&D systems               | AF6539     | sheep   | WB/IHC/IF   | 1:500/1:200/   |
| ATG7               | Santa Cruz                | Sc-33211   | Rabbit  | WB          | 1:200          |
| ATG9B              | Novus Biologicals         | NBP1-77169 | Rabbit  | IHC/WB      | 1:200/1:1000   |
| PROMI              | CST                       | #86781     | Rabbit  | WB          | 1:1000         |
| PROMI              | Millipore                 | MAB4399-1  | Mouse   | IF          | 1:200          |
| ACTB               | Beyotime<br>Biotechnology | AF0003     | Mouse   | WB          | 1:1000         |
| LC3                | MBL                       | M186-3     | Mouse   | WB          | 1:1000         |
| LC3                | MBL                       | M152-3     | Mouse   | IF          | 1:100          |
| Nestin             | Abcam                     | ab22035    | Mouse   | WB/IF       | 1:1000/1:200   |
| P62                | MBL                       | PM045      | Rabbit  | WB          | 1:1000         |
| BECN1              | MBL                       | PD017      | Rabbit  | WB          | 1:1000         |
| Ki-67              | ZSGB-BIO                  | ZM-0166    | Rabbit  | IHC         | 1:1            |

Table S7: Second antibodies information list

| second antibodies                                    | Company                   | Cat.NO    | Application | Dilution Ratio |
|------------------------------------------------------|---------------------------|-----------|-------------|----------------|
| sheep IgG Horseradish peroxidase-conjugated Antibody | R&D systems               | HAF016    | WB/IHC      | 1:500/1:100    |
| Anti-sheep IgG-NL637                                 | R&D systems               | NL011     | IF          | 1:1            |
| Anti-sheep IgG-NL493                                 | R&D systems               | NL012     | IF          | 1:1            |
| Anti-mouse IgG, HRP-linked Antibody                  | CST                       | #7076     | WB          | 1: 1000        |
| Anti-rabbit IgG, HRP-linked Antibody                 | CST                       | #7074     | WB          | 1: 1000        |
| IRDYR®800CW Goat anti-rabbit                         | LI-COR®                   | 926-32211 | WB          | 1:10000        |
| IRDYR®800CW Goat anti-mouse                          | LI-COR®                   | 926-32211 | WB          | 1:10000        |
| Anti-mouse IgG, Alexa Fluor 555-linked Antibody      | Beyotime<br>Biotechnology | A0460     | IF          | 1:500          |
| Anti-rabbit IgG, Alexa Fluor 555-linked Antibody     | Beyotime<br>Biotechnology | A0453     | IF          | 1:500          |
| Anti-mouse IgG, Alexa Fluor 488-linked Antibody      | Beyotime<br>Biotechnology | A0428     | IF          | 1:500          |
| Anti-rabbit IgG, Alexa Fluor 488-linked Antibody     | Beyotime<br>Biotechnology | A0423     | IF          | 1:500          |

Table S8: the clinicopathologic information of primary glioma cells.

| ID   | Diagnosis    | Age | Sex    | IDH1/2   | 1p/19q codeletion |
|------|--------------|-----|--------|----------|-------------------|
| GBM1 | Glioblastoma | 37  | Female | Wildtype | NO                |
| GBM2 | Glioblastoma | 21  | Male   | Wildtype | NO                |
| GBM3 | Glioblastoma | 68  | Male   | Wildtype | NO                |

|      |              |    |        |          |    |
|------|--------------|----|--------|----------|----|
| GBM4 | Glioblastoma | 62 | Female | Wildtype | NO |
| GBM5 | Glioblastoma | 33 | Male   | Wildtype | NO |
| GBM6 | Glioblastoma | 55 | Male   | Wildtype | NO |
| GBM7 | Glioblastoma | 36 | Male   | Wildtype | NO |
| GBM8 | Glioblastoma | 72 | Female | Wildtype | NO |

Table S9: the primer of 3 predicted binding region of ATG9B

| Binding Site | Name     | Forward Primer    | Reverse Primer     |
|--------------|----------|-------------------|--------------------|
| -370—-365    | pATG9B-1 | AAGCCATCCTCCACCT  | AAAGAACAGCAGCCAAA  |
| -1060—-1055  | pATG9B-2 | TGGTGAAACCCCATCTC | TGGCACAATCTCGGCTC  |
| -1721—-1716  | pATG9B-3 | GCCTCCAGTGAACAATC | AAAGCCATTACTGAGATA |
